# Supplementary material for: Causal Associations between Dietary Habits and Chronic Pain: A Two-Sample Mendelian Randomization Study
Source: MDPI journal article supplement (doi:10.3390/nu15173709), 2023-08-24
Supplement: s1 [file s1]

# **Causal Associations Between Dietary Habits and Chronic Pain: A Two-Sample Mendelian Randomization Study**

Ren Zhou, Lei Zhang, Yu Sun, Jia Yan\*, and Hong Jiang\*

Department of Anesthesiology, The Ninth People's Hospital of Shanghai, Jiao Tong University

School of Medicine, Shanghai, 200011, PR China

**\* Corresponding author**

Hong Jiang

The Ninth People's Hospital of Shanghai, Jiao Tong University School of

Medicine No. 639 Zhizaoju Road, Shanghai, 200011, PR China.

Email: [jianghongjiuyuan@163.com](mailto:jianghongjiuyuan@163.com)

Jia Yan

The Ninth People's Hospital of Shanghai, Jiao Tong University School of

Medicine No. 639 Zhizaoju Road, Shanghai, 200011, PR China.

Email: [mzkyanj@163.com](mailto:mzkyanj@163.com)

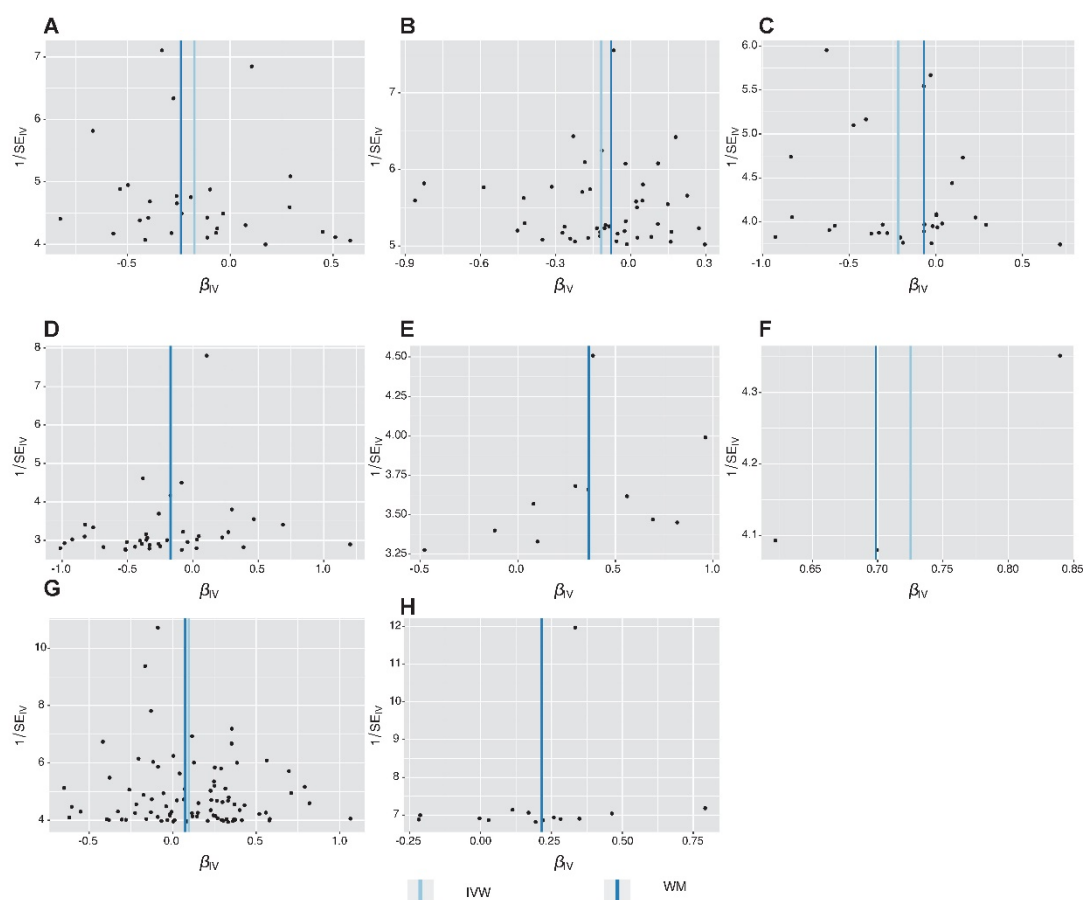

**Figure S1:** The figure displays the results of funnel plots in Mendelian randomization (MR). Funnel plot shows the estimates of precision ( $1/SE$ ) and Wald ratios for each SNP. A: Funnel plot for cereal intake and multisite chronic pain; B: Funnel plot for cheese intake and multisite chronic pain; C: Funnel plot for dried fruits intake and multisite chronic pain; D: Funnel plot for fresh fruits intake and multisite chronic pain; E: Funnel plot for pork intake and multisite chronic pain; F: Funnel plot for poultry intake and multisite chronic pain; G: Funnel plot for salt added in food and multisite chronic pain; H: Funnel plot for alcohol intake frequency and multisite chronic pain. IVW, inverse-variance-weighted; WM, weight median.

## Tables

Table S1 shown summary of 20 dietary habits questionnaire

Table S2-S5 shown the details of SNPs select.

Table S6-S8 shown the association between dietary habits and headache, chronic knee pain and chronic hip pain measured by IVW method.

Table S9-S14 shown the association between dietary habits and chronic pain measured by weight median method.

Table S15-S20 shown the association between dietary habits and chronic pain measured by weight median method.

Table S21-S26 shown the results of Heterogeneity, Pleiotropy, and directionality test.

Table S1 Summary of 20 dietary habits questionnaire

| Trait                   | Category                 | Question                                                                                                                                                                                                                                                                                    | Options                                                                                                                                       |
|-------------------------|--------------------------|---------------------------------------------------------------------------------------------------------------------------------------------------------------------------------------------------------------------------------------------------------------------------------------------|-----------------------------------------------------------------------------------------------------------------------------------------------|
| Beef intake             | Categorical (single)     | How often do you eat beef? (Do not count processed meats)                                                                                                                                                                                                                                   | Options: never, less than once a week, once a week, 2-4 times a week, 5-6 times a week, once or more daily, do not know, prefer not to answer |
| Bread intake            | Integer, slices/week     | How many slices of bread do you eat each WEEK?<br>For other types of bread:<br>- one bread roll = 2 slices<br>- one pitta bread = 2 slices                                                                                                                                                  | -                                                                                                                                             |
| Cereal intake           | Integer, bowls/week      | How many bowls of cereal do you eat a WEEK?                                                                                                                                                                                                                                                 | -                                                                                                                                             |
| Cheese intake           | Categorical (single)     | How often do you eat cheese? (Include cheese in pizzas, quiches, cheese sauce etc)                                                                                                                                                                                                          | Options: never, less than once a week, once a week, 2-4 times a week, 5-6 times a week, once or more daily, do not know, prefer not to answer |
| Coffee intake           | Integer, cups/day        | How many cups of coffee do you drink each DAY? (Include decaffeinated coffee)                                                                                                                                                                                                               | -                                                                                                                                             |
| Cooked vegetable intake | Integer, tablespoons/day | On average how many heaped tablespoons of COOKED vegetables would you eat per DAY? (Do not include potatoes; put '0' if you do not eat any)                                                                                                                                                 | -                                                                                                                                             |
| Dried fruit intake      | Integer, pieces/day      | About how many pieces of DRIED fruit would you eat per DAY? (Count one prune, one dried apricot, 10 raisins as one piece; put '0' if you do not eat any)                                                                                                                                    | -                                                                                                                                             |
| Fresh fruit intake      | Integer, pieces/day      | About how many pieces of FRESH fruit would you eat per DAY? (Count one apple, one banana, 10 grapes etc as one piece; put '0' if you do not eat any)                                                                                                                                        | -                                                                                                                                             |
| Lamb/mutton intake      | Categorical (single)     | How often do you eat lamb/mutton? (Do not count processed meats)                                                                                                                                                                                                                            | Options: never, less than once a week, once a week, 2-4 times a week, 5-6 times a week, once or more daily, do not know, prefer not to answer |
| Oily fish intake        | Categorical (single)     | How often do you eat oily fish? (e.g. sardines, salmon, mackerel, herring)<br>Oily fish include: Salmon Anchovies, Trout Swordfish, Mackerel Bloater, Herring Cacha, Sardines Carp, Pilchards Hilsa, Kipper Jack fish, Eel Katla, Whitebait Orange roughy, Tuna (fresh only) Pangas, Sprats | Options: never, less than once a week, once a week, 2-4 times a week, 5-6 times a week, once or more daily, do not know, prefer not to answer |
| Non-oily fish intake    | Categorical (single)     | How often do you eat other types of fish? (e.g. cod, tinned tuna, haddock)                                                                                                                                                                                                                  | Options: never, less than once a week, once a week, 2-4 times a week, 5-6 times a week, once or more daily, do not know, prefer not to answer |
| Pork intake             | Categorical (single)     | How often do you eat pork? (Do not count processed meats such as bacon or ham)                                                                                                                                                                                                              | Options: never, less than once a week, once a week, 2-4 times a week, 5-6 times a week, once or more daily, do not know, prefer not to answer |
| Poultry intake          | Categorical (single)     | How often do you eat chicken, turkey or other poultry? (Do not count processed meats)                                                                                                                                                                                                       | Options: never, less than once a week, once a week, 2-4 times a week, 5-6 times a week, once or more daily, do not know, prefer not to answer |

|                              |                          |                                                                                                                                                                 |                                                                                                                                                                   |
|------------------------------|--------------------------|-----------------------------------------------------------------------------------------------------------------------------------------------------------------|-------------------------------------------------------------------------------------------------------------------------------------------------------------------|
| Processed meat intake        | Categorical (single)     | How often do you eat processed meats (such as bacon, ham, sausages, meat pies, kebabs, burgers, chicken nuggets)?                                               | Options: never, less than once a week, once a week, 2-4 times a week, 5-6 times a week, once or more daily, do not know, prefer not to answer                     |
| Salad / raw vegetable intake | Integer, tablespoons/day | On average how many heaped tablespoons of SALAD or RAW vegetables would you eat per DAY? (Include lettuce, tomato in sandwiches; put '0' if you do not eat any) | -                                                                                                                                                                 |
| Salt added to food           | Categorical (single)     | Do you add salt to your food? (Do not include salt used in cooking)                                                                                             | Options: never/ rarely, sometimes, usually, always, prefer not to answer                                                                                          |
| Water intake                 | Integer, glasses/day     | How many glasses of water do you drink each DAY?                                                                                                                | -                                                                                                                                                                 |
| Hot drink temperature        | Categorical (single)     | How do you like your hot drinks? (Such as coffee or tea)                                                                                                        | Options: very hot, hot, warm, do not drink hot drinks, prefer not to answer                                                                                       |
| Tea intake                   | Integer, cups/day        | How many cups of tea do you drink each DAY? (Include black and green tea)                                                                                       | -                                                                                                                                                                 |
| Alcohol intake frequency     | Categorical (single)     | About how often do you drink alcohol?                                                                                                                           | Options: daily or almost daily, three or four times a week, once or twice a week, one to three times a month, special occasions only, never, prefer not to answer |

---

Table S2:SNPs significantly correlated with dietary habits ( $P < 5 \times 10^{-8}$ ) and independence from each other ( $r^2 < 0.001$ ) within a clumping distance of 10,000 kb.

| exposure      | SNP            | samplesiz<br>e.exposure | beta.expos<br>ure | se.exposur<br>e | pval.expos<br>ure | effect_allele.<br>exposure | other_allele.<br>exposure | eaf.exposure | F_value  |             |
|---------------|----------------|-------------------------|-------------------|-----------------|-------------------|----------------------------|---------------------------|--------------|----------|-------------|
| Beef intake   | id:ukb-b-2862  | rs11165829              | 461053            | -0.0102         | 0.001779          | 9.80E-09                   | G                         | C            | 0.35997  | 32.88727317 |
| Beef intake   | id:ukb-b-2862  | rs1105388               | 461053            | -0.01138        | 0.001876          | 1.30E-09                   | T                         | C            | 0.300147 | 36.78231107 |
| Beef intake   | id:ukb-b-2862  | rs10789340              | 461053            | -0.01378        | 0.001769          | 6.80E-15                   | G                         | A            | 0.626712 | 60.65227778 |
| Beef intake   | id:ukb-b-2862  | rs1470610               | 461053            | -0.01222        | 0.002158          | 1.50E-08                   | C                         | G            | 0.196185 | 32.05033591 |
| Beef intake   | id:ukb-b-2862  | rs62169335              | 461053            | -0.00969        | 0.001735          | 2.40E-08                   | T                         | C            | 0.543241 | 31.16017894 |
| Beef intake   | id:ukb-b-2862  | rs4676964               | 461053            | 0.013353        | 0.001724          | 9.60E-15                   | T                         | C            | 0.510605 | 59.96685299 |
| Beef intake   | id:ukb-b-2862  | rs62396185              | 461053            | -0.01484        | 0.001951          | 2.80E-14                   | C                         | G            | 0.260057 | 57.89211388 |
| Beef intake   | id:ukb-b-2862  | rs7791463               | 461053            | 0.009548        | 0.001711          | 2.40E-08                   | A                         | G            | 0.534781 | 31.15691847 |
| Beef intake   | id:ukb-b-2862  | rs79809011              | 461053            | -0.02806        | 0.005085          | 3.40E-08                   | A                         | G            | 0.029465 | 30.45106577 |
| Beef intake   | id:ukb-b-2862  | rs9407624               | 461053            | -0.01376        | 0.001716          | 1.10E-15                   | A                         | T            | 0.488187 | 64.33126461 |
| Beef intake   | id:ukb-b-2862  | rs10959890              | 461053            | -0.01267        | 0.002096          | 1.50E-09                   | C                         | T            | 0.212297 | 36.51212522 |
| Beef intake   | id:ukb-b-2862  | rs12247907              | 461053            | 0.009841        | 0.001711          | 8.90E-09                   | C                         | G            | 0.485752 | 33.0688003  |
| Beef intake   | id:ukb-b-2862  | rs1421085               | 461053            | -0.01212        | 0.001743          | 3.50E-12                   | C                         | T            | 0.403433 | 48.39152861 |
| Beef intake   | id:ukb-b-2862  | rs784251                | 461053            | -0.01034        | 0.001717          | 1.70E-09                   | T                         | C            | 0.477649 | 36.27765374 |
| Beef intake   | id:ukb-b-2862  | rs429358                | 461053            | -0.01485        | 0.002368          | 3.60E-10                   | C                         | T            | 0.154226 | 39.31868769 |
| Beef intake   | id:ukb-b-2862  | rs11878917              | 461053            | 0.015019        | 0.002748          | 4.60E-08                   | A                         | G            | 0.109688 | 29.87711671 |
| Beef intake   | id:ukb-b-2862  | rs132901                | 461053            | 0.013925        | 0.002093          | 2.90E-11                   | T                         | C            | 0.787662 | 44.27111051 |
| Bread intake  | id:ukb-b-11348 | rs9662365               | 452236            | 0.012166        | 0.001989          | 9.60E-10                   | T                         | C            | 0.499481 | 37.40601951 |
| Bread intake  | id:ukb-b-11348 | rs13023099              | 452236            | -0.01147        | 0.002023          | 1.40E-08                   | A                         | C            | 0.571784 | 32.15521872 |
| Bread intake  | id:ukb-b-11348 | rs6754311               | 452236            | 0.014135        | 0.002247          | 3.10E-10                   | C                         | T            | 0.264485 | 39.58860057 |
| Bread intake  | id:ukb-b-11348 | rs4665972               | 452236            | -0.01424        | 0.002043          | 3.20E-12                   | C                         | T            | 0.604541 | 48.53963829 |
| Bread intake  | id:ukb-b-11348 | rs75287965              | 452236            | -0.02475        | 0.004097          | 1.50E-09                   | A                         | G            | 0.062933 | 36.47836298 |
| Bread intake  | id:ukb-b-11348 | rs13016665              | 452236            | 0.014754        | 0.002028          | 3.50E-13                   | A                         | C            | 0.423235 | 52.9155126  |
| Bread intake  | id:ukb-b-11348 | rs1492988               | 452236            | 0.011545        | 0.002035          | 1.40E-08                   | G                         | C            | 0.599095 | 32.16824424 |
| Bread intake  | id:ukb-b-11348 | rs9832088               | 452236            | 0.014729        | 0.001989          | 1.30E-13                   | A                         | T            | 0.521617 | 54.83556556 |
| Bread intake  | id:ukb-b-11348 | rs9881332               | 452236            | 0.01137         | 0.002022          | 1.90E-08                   | G                         | C            | 0.581804 | 31.62463015 |
| Bread intake  | id:ukb-b-11348 | rs1994315               | 452236            | -0.01682        | 0.002144          | 4.30E-15                   | C                         | T            | 0.685162 | 61.5490717  |
| Bread intake  | id:ukb-b-11348 | rs73802707              | 452236            | -0.01593        | 0.002762          | 8.00E-09                   | T                         | C            | 0.153694 | 33.2715066  |
| Bread intake  | id:ukb-b-11348 | rs2068650               | 452236            | -0.01394        | 0.001999          | 3.10E-12                   | C                         | A            | 0.472074 | 48.60146191 |
| Bread intake  | id:ukb-b-11348 | rs17083079              | 452236            | 0.030114        | 0.004679          | 1.20E-10                   | A                         | G            | 0.047423 | 41.41469758 |
| Bread intake  | id:ukb-b-11348 | rs2517678               | 452236            | 0.013233        | 0.002086          | 2.20E-10                   | T                         | C            | 0.368395 | 40.24355561 |
| Bread intake  | id:ukb-b-11348 | rs596878                | 452236            | -0.01174        | 0.002011          | 5.30E-09                   | C                         | A            | 0.449595 | 34.08568053 |
| Bread intake  | id:ukb-b-11348 | rs79436018              | 452236            | -0.01761        | 0.003116          | 1.60E-08                   | C                         | T            | 0.116276 | 31.94700686 |
| Bread intake  | id:ukb-b-11348 | rs7802468               | 452236            | -0.02335        | 0.002056          | 6.90E-30                   | T                         | C            | 0.371501 | 128.9749813 |
| Bread intake  | id:ukb-b-11348 | rs10761661              | 452236            | -0.01149        | 0.002005          | 1.00E-08                   | T                         | C            | 0.45322  | 32.81776663 |
| Bread intake  | id:ukb-b-11348 | rs55745436              | 452236            | 0.013425        | 0.002343          | 1.00E-08                   | T                         | C            | 0.237279 | 32.83891785 |
| Bread intake  | id:ukb-b-11348 | rs1940033               | 452236            | -0.01108        | 0.002028          | 4.70E-08                   | T                         | C            | 0.592727 | 29.831911   |
| Bread intake  | id:ukb-b-11348 | rs11183201              | 452236            | -0.01673        | 0.001996          | 5.30E-17                   | C                         | T            | 0.507856 | 70.23026857 |
| Bread intake  | id:ukb-b-11348 | rs6580721               | 452236            | 0.017205        | 0.002544          | 1.30E-11                   | G                         | A            | 0.188665 | 45.7539713  |
| Bread intake  | id:ukb-b-11348 | rs11060853              | 452236            | -0.01279        | 0.002021          | 2.50E-10                   | G                         | A            | 0.411804 | 40.04943754 |
| Bread intake  | id:ukb-b-11348 | rs9564268               | 452236            | -0.01216        | 0.002049          | 3.00E-09                   | C                         | T            | 0.615619 | 35.21198027 |
| Bread intake  | id:ukb-b-11348 | rs9529024               | 452236            | -0.01292        | 0.002068          | 4.20E-10                   | T                         | A            | 0.370396 | 39.01657363 |
| Bread intake  | id:ukb-b-11348 | rs11628639              | 452236            | -0.0135         | 0.002322          | 6.20E-09                   | C                         | T            | 0.243333 | 33.76945832 |
| Bread intake  | id:ukb-b-11348 | rs9323989               | 452236            | -0.01161        | 0.002055          | 1.60E-08                   | C                         | T            | 0.379169 | 31.92741773 |
| Bread intake  | id:ukb-b-11348 | rs28406095              | 452236            | -0.01095        | 0.002             | 4.40E-08                   | A                         | G            | 0.461729 | 29.96655416 |
| Bread intake  | id:ukb-b-11348 | rs4984685               | 452236            | 0.013585        | 0.002481          | 4.40E-08                   | A                         | G            | 0.201006 | 29.98602382 |
| Bread intake  | id:ukb-b-11348 | rs62091167              | 452236            | -0.01384        | 0.002425          | 1.20E-08                   | C                         | A            | 0.215931 | 32.56520365 |
| Bread intake  | id:ukb-b-11348 | rs656817                | 452236            | -0.01269        | 0.002109          | 1.80E-09                   | G                         | A            | 0.334442 | 36.18547597 |
| Bread intake  | id:ukb-b-11348 | rs7276867               | 452236            | 0.011348        | 0.002003          | 1.50E-08                   | C                         | G            | 0.541677 | 32.09791005 |
| Cereal intake | id:ukb-b-15926 | rs10857964              | 441640            | 0.014087        | 0.002205          | 1.70E-10                   | C                         | T            | 0.205117 | 40.80158275 |
| Cereal intake | id:ukb-b-15926 | rs12354267              | 441640            | 0.011647        | 0.001933          | 1.70E-09                   | C                         | T            | 0.309145 | 36.31459321 |
| Cereal intake | id:ukb-b-15926 | rs112780312             | 441640            | -0.01215        | 0.002019          | 1.80E-09                   | A                         | G            | 0.274969 | 36.20773852 |
| Cereal intake | id:ukb-b-15926 | rs184643                | 441640            | -0.01217        | 0.001805          | 1.60E-11                   | A                         | G            | 0.56672  | 45.43770193 |
| Cereal intake | id:ukb-b-15926 | rs6545770               | 441640            | -0.01373        | 0.00206           | 2.70E-11                   | T                         | A            | 0.748101 | 44.39225873 |
| Cereal intake | id:ukb-b-15926 | rs4988235               | 441640            | 0.0114          | 0.002012          | 1.50E-08                   | A                         | G            | 0.736893 | 32.09052108 |
| Cereal intake | id:ukb-b-15926 | rs67723420              | 441640            | 0.010525        | 0.001847          | 1.20E-08                   | A                         | T            | 0.376335 | 32.48564794 |
| Cereal intake | id:ukb-b-15926 | rs7619139               | 441640            | -0.01695        | 0.001815          | 9.70E-21                   | A                         | T            | 0.588533 | 87.22524031 |
| Cereal intake | id:ukb-b-15926 | rs9846396               | 441640            | 0.011967        | 0.0018            | 3.00E-11                   | T                         | C            | 0.441556 | 44.18806933 |
| Cereal intake | id:ukb-b-15926 | rs11097340              | 441640            | -0.01153        | 0.001815          | 2.10E-10                   | T                         | C            | 0.399592 | 40.37910276 |
| Cereal intake | id:ukb-b-15926 | rs3115230               | 441640            | -0.01148        | 0.002071          | 3.00E-08                   | A                         | C            | 0.752001 | 30.70680772 |
| Cereal intake | id:ukb-b-15926 | rs11940694              | 441640            | -0.01266        | 0.001834          | 5.00E-12                   | G                         | A            | 0.604068 | 47.67251045 |
| Cereal intake | id:ukb-b-15926 | rs10057775              | 441640            | 0.020029        | 0.002894          | 4.50E-12                   | C                         | T            | 0.893563 | 47.90717053 |
| Cereal intake | id:ukb-b-15926 | rs79642906              | 441640            | -0.01816        | 0.003228          | 1.90E-08                   | A                         | G            | 0.083314 | 31.64036363 |
| Cereal intake | id:ukb-b-15926 | rs1853931               | 441640            | -0.01134        | 0.00181           | 3.80E-10                   | A                         | G            | 0.531294 | 39.22312969 |
| Cereal intake | id:ukb-b-15926 | rs6918737               | 441640            | 0.013733        | 0.00211           | 7.60E-11                   | A                         | T            | 0.234488 | 42.36752626 |
| Cereal intake | id:ukb-b-15926 | rs2817377               | 441640            | 0.009901        | 0.001789          | 3.10E-08                   | A                         | G            | 0.537948 | 30.61703973 |
| Cereal intake | id:ukb-b-15926 | rs2504706               | 441640            | 0.018179        | 0.002102          | 5.30E-18                   | C                         | T            | 0.234682 | 74.77077467 |
| Cereal intake | id:ukb-b-15926 | rs9374896               | 441640            | 0.017527        | 0.001792          | 1.30E-22                   | T                         | C            | 0.466274 | 95.69385416 |
| Cereal intake | id:ukb-b-15926 | rs4410790               | 441640            | -0.01091        | 0.001847          | 3.40E-09                   | C                         | T            | 0.630668 | 34.91982764 |
| Cereal intake | id:ukb-b-15926 | rs62442924              | 441640            | 0.012731        | 0.002257          | 1.70E-08                   | T                         | C            | 0.194276 | 31.81415996 |
| Cereal intake | id:ukb-b-15926 | rs13234131              | 441640            | 0.017012        | 0.00266           | 1.60E-10                   | G                         | A            | 0.128369 | 40.8946836  |
| Cereal intake | id:ukb-b-15926 | rs9987289               | 441640            | 0.017868        | 0.003095          | 7.80E-09                   | G                         | A            | 0.908767 | 33.33572591 |
| Cereal intake | id:ukb-b-15926 | rs4739095               | 441640            | -0.01287        | 0.002105          | 9.90E-10                   | A                         | G            | 0.765732 | 37.34745298 |
| Cereal intake | id:ukb-b-15926 | rs2927238               | 441640            | 0.010247        | 0.001829          | 2.10E-08                   | G                         | T            | 0.613181 | 31.39197665 |
| Cereal intake | id:ukb-b-15926 | rs2799849               | 441640            | -0.01233        | 0.001906          | 9.80E-11                   | T                         | C            | 0.678123 | 41.85293497 |
| Cereal intake | id:ukb-b-15926 | rs7040561               | 441640            | -0.01627        | 0.00252           | 1.10E-10                   | A                         | T            | 0.850635 | 41.67609777 |
| Cereal intake | id:ukb-b-15926 | rs491711                | 441640            | 0.011689        | 0.001934          | 1.50E-09                   | C                         | A            | 0.311975 | 36.53905705 |
| Cereal intake | id:ukb-b-15926 | rs2450126               | 441640            | -0.0149         | 0.002457          | 1.30E-09                   | G                         | A            | 0.156746 | 36.79447185 |
| Cereal intake | id:ukb-b-15926 | rs10837531              | 441640            | 0.010784        | 0.001797          | 2.00E-09                   | G                         | C            | 0.455002 | 36.01589606 |
| Cereal intake | id:ukb-b-15926 | rs11038810              | 441640            | 0.011134        | 0.001863          | 2.30E-09                   | G                         | A            | 0.644091 | 35.70948423 |

|                                 |             |        |          |          |          |   |   |          |              |
|---------------------------------|-------------|--------|----------|----------|----------|---|---|----------|--------------|
| Cereal intake    id:ukb-b-15926 | rs627185    | 441640 | -0.01083 | 0.001791 | 1.50E-09 | G | C | 0.544427 | 36.55387994  |
| Cereal intake    id:ukb-b-15926 | rs2472297   | 441640 | -0.01585 | 0.002022 | 4.50E-15 | T | C | 0.261458 | 61.46701454  |
| Cereal intake    id:ukb-b-15926 | rs1104608   | 441640 | 0.010863 | 0.001818 | 2.30E-09 | C | G | 0.426239 | 35.68604246  |
| Cereal intake    id:ukb-b-15926 | rs68136852  | 441640 | -0.01412 | 0.002478 | 1.20E-08 | A | C | 0.152389 | 32.46638078  |
| Cereal intake    id:ukb-b-15926 | rs3859193   | 441640 | -0.01033 | 0.001799 | 9.50E-09 | A | T | 0.470074 | 32.93551018  |
| Cereal intake    id:ukb-b-15926 | rs8097544   | 441640 | -0.02464 | 0.002541 | 3.20E-22 | G | A | 0.145206 | 94.00088012  |
| Cereal intake    id:ukb-b-15926 | rs4797242   | 441640 | 0.011431 | 0.001949 | 4.50E-09 | A | C | 0.297207 | 34.4040042   |
| Cereal intake    id:ukb-b-15926 | rs11670024  | 441640 | 0.016011 | 0.002799 | 1.10E-08 | G | A | 0.115508 | 32.711199107 |
| Cereal intake    id:ukb-b-15926 | rs6510177   | 441640 | -0.01304 | 0.002287 | 1.20E-08 | C | T | 0.805589 | 32.47501065  |
| Cereal intake    id:ukb-b-15926 | rs78854891  | 441640 | 0.022141 | 0.003633 | 1.10E-09 | C | T | 0.065728 | 37.13974364  |
| Cereal intake    id:ukb-b-15926 | rs56131196  | 441640 | 0.018002 | 0.002277 | 2.70E-15 | A | G | 0.188724 | 62.51062288  |
| Cereal intake    id:ukb-b-15926 | rs838133    | 441640 | -0.02065 | 0.001843 | 3.90E-29 | G | A | 0.549201 | 125.5181256  |
| Cheese intake    id:ukb-b-1489  | rs78876700  | 451486 | 0.018097 | 0.003279 | 3.40E-08 | A | G | 0.137431 | 30.46726708  |
| Cheese intake    id:ukb-b-1489  | rs531358    | 451486 | 0.013167 | 0.002337 | 1.80E-08 | T | C | 0.649768 | 31.73325704  |
| Cheese intake    id:ukb-b-1489  | rs2802530   | 451486 | 0.018627 | 0.003397 | 4.20E-08 | A | G | 0.876502 | 30.06532171  |
| Cheese intake    id:ukb-b-1489  | rs6685323   | 451486 | -0.01319 | 0.002416 | 4.80E-08 | T | C | 0.309293 | 29.80110002  |
| Cheese intake    id:ukb-b-1489  | rs2339928   | 451486 | 0.014858 | 0.002445 | 1.20E-09 | A | G | 0.704069 | 36.92943     |
| Cheese intake    id:ukb-b-1489  | rs12475594  | 451486 | 0.016007 | 0.002925 | 4.40E-08 | G | A | 0.178459 | 29.94545924  |
| Cheese intake    id:ukb-b-1489  | rs504675    | 451486 | 0.027442 | 0.002342 | 1.00E-31 | T | C | 0.352634 | 137.3150591  |
| Cheese intake    id:ukb-b-1489  | rs72970243  | 451486 | 0.022201 | 0.003402 | 6.70E-11 | A | G | 0.12044  | 42.59583927  |
| Cheese intake    id:ukb-b-1489  | rs1514755   | 451486 | 0.016375 | 0.002617 | 3.90E-10 | G | A | 0.239596 | 39.16629721  |
| Cheese intake    id:ukb-b-1489  | rs79184944  | 451486 | 0.019602 | 0.003285 | 2.40E-09 | A | T | 0.134346 | 35.61494018  |
| Cheese intake    id:ukb-b-1489  | rs4296548   | 451486 | 0.013025 | 0.002288 | 1.20E-08 | G | T | 0.609594 | 32.4102374   |
| Cheese intake    id:ukb-b-1489  | rs62245792  | 451486 | -0.01793 | 0.003163 | 1.40E-08 | A | T | 0.150049 | 32.14505017  |
| Cheese intake    id:ukb-b-1489  | rs77742462  | 451486 | -0.04747 | 0.008278 | 9.80E-09 | G | A | 0.020525 | 32.8794745   |
| Cheese intake    id:ukb-b-1489  | rs2352974   | 451486 | -0.0145  | 0.002243 | 1.00E-10 | T | C | 0.48979  | 41.78180193  |
| Cheese intake    id:ukb-b-1489  | rs6774906   | 451486 | 0.031629 | 0.005673 | 2.50E-08 | C | A | 0.040653 | 31.08955626  |
| Cheese intake    id:ukb-b-1489  | rs4681981   | 451486 | -0.01244 | 0.002241 | 2.90E-08 | A | C | 0.469086 | 30.78954762  |
| Cheese intake    id:ukb-b-1489  | rs4860341   | 451486 | 0.024365 | 0.004352 | 2.20E-08 | C | T | 0.928742 | 31.35147611  |
| Cheese intake    id:ukb-b-1489  | rs73096946  | 451486 | -0.02059 | 0.003067 | 1.90E-11 | C | T | 0.157396 | 45.08646211  |
| Cheese intake    id:ukb-b-1489  | rs13107325  | 451486 | -0.02916 | 0.004253 | 7.00E-12 | T | C | 0.074693 | 47.02524538  |
| Cheese intake    id:ukb-b-1489  | rs10938397  | 451486 | -0.01271 | 0.002258 | 1.80E-08 | G | A | 0.434462 | 31.68352763  |
| Cheese intake    id:ukb-b-1489  | rs4692708   | 451486 | 0.01473  | 0.002589 | 1.30E-08 | C | A | 0.252659 | 32.36802342  |
| Cheese intake    id:ukb-b-1489  | rs26579     | 451486 | -0.0128  | 0.002294 | 2.40E-08 | C | G | 0.586217 | 31.12994736  |
| Cheese intake    id:ukb-b-1489  | rs6873324   | 451486 | -0.01248 | 0.002271 | 3.90E-08 | C | A | 0.425802 | 30.18988844  |
| Cheese intake    id:ukb-b-1489  | rs9504123   | 451486 | 0.014171 | 0.002504 | 1.50E-08 | C | A | 0.274743 | 32.02970398  |
| Cheese intake    id:ukb-b-1489  | rs975303    | 451486 | 0.021276 | 0.002907 | 2.50E-13 | G | A | 0.181313 | 53.56443861  |
| Cheese intake    id:ukb-b-1489  | rs1931805   | 451486 | 0.012636 | 0.002236 | 1.60E-08 | C | T | 0.500062 | 31.93972844  |
| Cheese intake    id:ukb-b-1489  | rs113367286 | 451486 | 0.01518  | 0.0025   | 1.30E-09 | T | C | 0.278467 | 36.87215126  |
| Cheese intake    id:ukb-b-1489  | rs34198643  | 451486 | -0.0167  | 0.002679 | 4.50E-10 | T | C | 0.224165 | 38.87448361  |
| Cheese intake    id:ukb-b-1489  | rs12672200  | 451486 | -0.01376 | 0.002395 | 9.00E-09 | A | G | 0.325794 | 33.03695536  |
| Cheese intake    id:ukb-b-1489  | rs9649582   | 451486 | -0.01462 | 0.002412 | 1.40E-09 | T | A | 0.317256 | 36.73731282  |
| Cheese intake    id:ukb-b-1489  | rs7012814   | 451486 | -0.01852 | 0.002254 | 2.10E-16 | A | G | 0.473966 | 67.48969346  |
| Cheese intake    id:ukb-b-1489  | rs7386207   | 451486 | -0.0125  | 0.002269 | 3.60E-08 | T | C | 0.563517 | 30.33015659  |
| Cheese intake    id:ukb-b-1489  | rs13257887  | 451486 | 0.016181 | 0.002562 | 2.70E-10 | C | T | 0.358942 | 39.89231082  |
| Cheese intake    id:ukb-b-1489  | rs3911016   | 451486 | 0.021357 | 0.00344  | 5.30E-10 | G | T | 0.120938 | 38.54792995  |
| Cheese intake    id:ukb-b-1489  | rs4503172   | 451486 | 0.01296  | 0.002293 | 1.60E-08 | T | C | 0.608301 | 31.94295465  |
| Cheese intake    id:ukb-b-1489  | rs1806771   | 451486 | -0.02215 | 0.004035 | 4.10E-08 | G | T | 0.087876 | 30.12527134  |
| Cheese intake    id:ukb-b-1489  | rs73335955  | 451486 | 0.027773 | 0.004978 | 2.40E-08 | C | T | 0.05334  | 31.12299753  |
| Cheese intake    id:ukb-b-1489  | rs10896050  | 451486 | -0.01847 | 0.002834 | 7.20E-11 | T | G | 0.193171 | 42.46138221  |
| Cheese intake    id:ukb-b-1489  | rs67238148  | 451486 | 0.016543 | 0.002714 | 1.10E-09 | T | G | 0.217471 | 37.14641847  |
| Cheese intake    id:ukb-b-1489  | rs7936836   | 451486 | 0.015903 | 0.002273 | 2.60E-12 | A | C | 0.417538 | 48.96218478  |
| Cheese intake    id:ukb-b-1489  | rs73024305  | 451486 | 0.032537 | 0.004927 | 4.00E-11 | C | G | 0.054789 | 43.60799977  |
| Cheese intake    id:ukb-b-1489  | rs12786959  | 451486 | -0.01607 | 0.002282 | 1.20E-08 | T | A | 0.196267 | 32.88144616  |
| Cheese intake    id:ukb-b-1489  | rs524468    | 451486 | -0.01424 | 0.002552 | 2.40E-08 | G | A | 0.260633 | 31.15440566  |
| Cheese intake    id:ukb-b-1489  | rs1024853   | 451486 | -0.01286 | 0.002262 | 1.30E-08 | G | C | 0.437902 | 32.32697644  |
| Cheese intake    id:ukb-b-1489  | rs7298331   | 451486 | -0.01318 | 0.002306 | 1.10E-08 | C | A | 0.604531 | 32.64583963  |
| Cheese intake    id:ukb-b-1489  | rs12296440  | 451486 | 0.018794 | 0.00298  | 2.80E-10 | A | G | 0.169681 | 39.77945989  |
| Cheese intake    id:ukb-b-1489  | rs61953351  | 451486 | 0.014593 | 0.00258  | 1.50E-08 | T | G | 0.250366 | 31.99448498  |
| Cheese intake    id:ukb-b-1489  | rs1073242   | 451486 | 0.015728 | 0.002292 | 6.70E-12 | A | G | 0.553825 | 47.10690108  |
| Cheese intake    id:ukb-b-1489  | rs11620149  | 451486 | -0.01767 | 0.003209 | 3.60E-08 | C | T | 0.143308 | 30.34521272  |
| Cheese intake    id:ukb-b-1489  | rs17115145  | 451486 | -0.01288 | 0.00229  | 1.80E-08 | T | C | 0.401282 | 31.64959297  |
| Cheese intake    id:ukb-b-1489  | rs35270670  | 451486 | 0.016379 | 0.00271  | 1.50E-09 | G | A | 0.217962 | 36.53766027  |
| Cheese intake    id:ukb-b-1489  | rs4776970   | 451486 | 0.015409 | 0.002327 | 3.50E-11 | T | A | 0.357982 | 43.85391064  |
| Cheese intake    id:ukb-b-1489  | rs12447542  | 451486 | 0.019748 | 0.003407 | 6.80E-09 | A | G | 0.12558  | 33.59614718  |
| Cheese intake    id:ukb-b-1489  | rs61734410  | 451486 | 0.016654 | 0.002623 | 2.20E-10 | T | C | 0.255213 | 40.31903066  |
| Cheese intake    id:ukb-b-1489  | rs62034322  | 451486 | -0.01394 | 0.0023   | 1.40E-09 | A | G | 0.379848 | 36.71489677  |
| Cheese intake    id:ukb-b-1489  | rs71386942  | 451486 | 0.014455 | 0.002522 | 9.90E-09 | A | C | 0.268947 | 32.85132137  |
| Cheese intake    id:ukb-b-1489  | rs11649653  | 451486 | 0.013849 | 0.002292 | 1.50E-09 | G | C | 0.38208  | 36.51688563  |
| Cheese intake    id:ukb-b-1489  | rs919109    | 451486 | 0.019938 | 0.003243 | 7.90E-10 | C | G | 0.138752 | 37.79203953  |
| Cheese intake    id:ukb-b-1489  | rs2854175   | 451486 | 0.016994 | 0.002569 | 3.70E-11 | A | C | 0.257474 | 43.77166659  |
| Cheese intake    id:ukb-b-1489  | rs12951057  | 451486 | -0.02116 | 0.003044 | 3.60E-12 | G | C | 0.165627 | 48.30966088  |
| Cheese intake    id:ukb-b-1489  | rs2960578   | 451486 | 0.017028 | 0.002236 | 2.60E-14 | G | T | 0.496281 | 57.99855775  |
| Cheese intake    id:ukb-b-1489  | rs1434511   | 451486 | 0.012965 | 0.002259 | 9.50E-09 | T | C | 0.455286 | 32.94646557  |
| Cheese intake    id:ukb-b-1489  | rs1291145   | 451486 | -0.02025 | 0.00241  | 4.40E-17 | C | T | 0.685848 | 70.58311508  |
| Cheese intake    id:ukb-b-1489  | rs6126641   | 451486 | 0.013226 | 0.002395 | 3.30E-08 | A | G | 0.336196 | 30.49825667  |
| Cheese intake    id:ukb-b-1489  | rs62236533  | 451486 | 0.024762 | 0.003647 | 1.10E-11 | A | G | 0.108791 | 46.105349    |
| Coffee intake    id:ukb-b-5237  | rs516636    | 428860 | 0.011677 | 0.001984 | 4.00E-09 | A | C | 0.208913 | 34.6316937   |
| Coffee intake    id:ukb-b-5237  | rs4615895   | 428860 | 0.012203 | 0.00185  | 4.20E-11 | A | G | 0.740926 | 43.51967545  |
| Coffee intake    id:ukb-b-5237  | rs13387939  | 428860 | 0.016556 | 0.002139 | 9.80E-15 | A | C | 0.828363 | 59.92957774  |
| Coffee intake    id:ukb-b-5237  | rs780093    | 428860 | 0.013294 | 0.001657 | 1.00E-15 | C | T | 0.615839 | 64.36649682  |
| Coffee intake    id:ukb-b-5237  | rs12989746  | 428860 | 0.01035  | 0.001864 | 2.80E-08 | T | G | 0.249928 | 30.8214992   |
| Coffee intake    id:ukb-b-5237  | rs1527961   | 428860 | -0.01334 | 0.002366 | 1.70E-08 | C | T | 0.1349   | 31.80819827  |
| Coffee intake    id:ukb-b-5237  | rs2597805   | 428860 | 0.009855 | 0.001756 | 2.00E-08 | T | C | 0.682463 | 31.48851904  |
| Coffee intake    id:ukb-b-5237  | rs2189234   | 428860 | 0.009987 | 0.001661 | 1.80E-09 | G | T | 0.617795 | 36.17198243  |
| Coffee intake    id:ukb-b-5237  | rs13163336  | 428860 | 0.014947 | 0.00221  | 1.30E-11 | A | C | 0.15761  | 45.74203614  |
| Coffee intake    id:ukb-b-5237  | rs12514566  | 428860 | -0.0114  | 0.001706 | 2.40E-11 | A | G | 0.337107 | 44.65106059  |

|                                          |             |        |           |          |           |   |   |          |             |
|------------------------------------------|-------------|--------|-----------|----------|-----------|---|---|----------|-------------|
| Coffee intake    id:ukb-b-5237           | rs2465037   | 428860 | -0.01063  | 0.001707 | 4.80E-10  | A | C | 0.343017 | 38.77212562 |
| Coffee intake    id:ukb-b-5237           | rs1338549   | 428860 | -0.00945  | 0.001622 | 5.60E-09  | G | T | 0.533932 | 33.96098155 |
| Coffee intake    id:ukb-b-5237           | rs9398171   | 428860 | 0.010858  | 0.00178  | 1.10E-09  | T | C | 0.71064  | 37.21003427 |
| Coffee intake    id:ukb-b-5237           | rs73075167  | 428860 | -0.01606  | 0.002444 | 5.00E-11  | T | A | 0.12918  | 43.19132446 |
| Coffee intake    id:ukb-b-5237           | rs7811609   | 428860 | 0.009139  | 0.001665 | 4.00E-08  | T | C | 0.374746 | 30.13711083 |
| Coffee intake    id:ukb-b-5237           | rs1057868   | 428860 | 0.019951  | 0.001785 | 5.40E-29  | T | C | 0.284986 | 124.9009737 |
| Coffee intake    id:ukb-b-5237           | rs4410790   | 428860 | 0.039072  | 0.001673 | 1.20E-120 | C | T | 0.632141 | 545.5087317 |
| Coffee intake    id:ukb-b-5237           | rs34060476  | 428860 | 0.018429  | 0.00237  | 7.50E-15  | G | A | 0.133855 | 60.44986565 |
| Coffee intake    id:ukb-b-5237           | rs6469262   | 428860 | -0.00915  | 0.001629 | 1.90E-08  | C | T | 0.564966 | 31.57592028 |
| Coffee intake    id:ukb-b-5237           | rs78267637  | 428860 | -0.02543  | 0.004317 | 3.90E-09  | G | C | 0.038115 | 34.69533367 |
| Coffee intake    id:ukb-b-5237           | rs442355    | 428860 | -0.01114  | 0.001854 | 1.90E-09  | C | G | 0.254435 | 36.09561078 |
| Coffee intake    id:ukb-b-5237           | rs10119174  | 428860 | -0.0094   | 0.001642 | 1.00E-08  | C | G | 0.571035 | 32.77393185 |
| Coffee intake    id:ukb-b-5237           | rs117810762 | 428860 | 0.035909  | 0.006179 | 6.20E-09  | A | G | 0.017881 | 33.77546389 |
| Coffee intake    id:ukb-b-5237           | rs61928609  | 428860 | -0.01473  | 0.002175 | 1.30E-11  | C | A | 0.835328 | 45.85352204 |
| Coffee intake    id:ukb-b-5237           | rs2472297   | 428860 | 0.046471  | 0.001827 | 1.10E-142 | T | C | 0.262883 | 646.7349474 |
| Coffee intake    id:ukb-b-5237           | rs117968677 | 428860 | -0.03103  | 0.005516 | 1.90E-08  | A | G | 0.024207 | 31.6454053  |
| Coffee intake    id:ukb-b-5237           | rs8056750   | 428860 | 0.010533  | 0.001737 | 1.30E-09  | T | C | 0.359129 | 36.77640515 |
| Coffee intake    id:ukb-b-5237           | rs1421085   | 428860 | 0.018543  | 0.001644 | 1.70E-29  | C | T | 0.40357  | 127.159102  |
| Coffee intake    id:ukb-b-5237           | rs62064918  | 428860 | -0.01031  | 0.001879 | 4.10E-08  | T | C | 0.244545 | 30.10111407 |
| Coffee intake    id:ukb-b-5237           | rs57918684  | 428860 | 0.012886  | 0.002238 | 8.60E-09  | A | G | 0.154747 | 33.14121451 |
| Coffee intake    id:ukb-b-5237           | rs7224815   | 428860 | -0.01086  | 0.001642 | 3.70E-11  | T | A | 0.407832 | 43.76534713 |
| Coffee intake    id:ukb-b-5237           | rs630194    | 428860 | -0.01135  | 0.001699 | 2.30E-11  | C | T | 0.343374 | 44.67841767 |
| Coffee intake    id:ukb-b-5237           | rs1942965   | 428860 | -0.0089   | 0.001619 | 3.80E-08  | C | T | 0.504585 | 30.23610867 |
| Coffee intake    id:ukb-b-5237           | rs476828    | 428860 | 0.017346  | 0.001895 | 5.60E-20  | C | T | 0.237409 | 83.75065094 |
| Coffee intake    id:ukb-b-5237           | rs56113850  | 428860 | 0.012667  | 0.001634 | 8.90E-15  | C | T | 0.578109 | 60.12891602 |
| Coffee intake    id:ukb-b-5237           | rs75347775  | 428860 | 0.01045   | 0.001879 | 2.70E-08  | A | G | 0.244531 | 30.93296233 |
| Coffee intake    id:ukb-b-5237           | rs6063085   | 428860 | 0.010411  | 0.001669 | 4.50E-10  | C | A | 0.373473 | 38.8991375  |
| Coffee intake    id:ukb-b-5237           | rs6062682   | 428860 | 0.01037   | 0.001639 | 2.50E-10  | T | C | 0.464546 | 40.0221679  |
| Coffee intake    id:ukb-b-5237           | rs13054099  | 428860 | -0.01078  | 0.001836 | 4.30E-09  | C | T | 0.261004 | 34.46045604 |
| Coffee intake    id:ukb-b-5237           | rs17842490  | 428860 | -0.04517  | 0.006808 | 3.30E-11  | G | A | 0.014248 | 44.01160013 |
| Cooked vegetable intake    id:ukb-b-8089 | rs2252508   | 448651 | 0.009102  | 0.001562 | 5.70E-09  | A | A | 0.480256 | 33.94095089 |
| Cooked vegetable intake    id:ukb-b-8089 | rs2102738   | 448651 | -0.01216  | 0.002083 | 5.30E-09  | C | A | 0.172403 | 34.06615436 |
| Cooked vegetable intake    id:ukb-b-8089 | rs4851029   | 448651 | 0.010174  | 0.001564 | 7.80E-11  | G | T | 0.526969 | 42.30740555 |
| Cooked vegetable intake    id:ukb-b-8089 | rs12629972  | 448651 | 0.0118    | 0.001591 | 1.20E-13  | C | T | 0.588311 | 55.01758267 |
| Cooked vegetable intake    id:ukb-b-8089 | rs28450747  | 448651 | -0.01016  | 0.001855 | 4.30E-08  | A | G | 0.23257  | 30.01057162 |
| Cooked vegetable intake    id:ukb-b-8089 | rs1816263   | 448651 | 0.009581  | 0.001741 | 3.70E-08  | C | T | 0.280188 | 30.29902797 |
| Cooked vegetable intake    id:ukb-b-8089 | rs2844672   | 448651 | -0.00964  | 0.001609 | 2.10E-09  | A | G | 0.624125 | 35.90141171 |
| Cooked vegetable intake    id:ukb-b-8089 | rs12550717  | 448651 | 0.009187  | 0.001619 | 1.40E-08  | A | G | 0.372413 | 32.20362875 |
| Cooked vegetable intake    id:ukb-b-8089 | rs10156602  | 448651 | 0.011006  | 0.001637 | 1.80E-11  | G | A | 0.361369 | 45.21206197 |
| Cooked vegetable intake    id:ukb-b-8089 | rs11138705  | 448651 | -0.010372 | 0.00183  | 1.40E-08  | C | G | 0.757204 | 32.11899728 |
| Cooked vegetable intake    id:ukb-b-8089 | rs2052063   | 448651 | -0.00946  | 0.001568 | 1.60E-09  | T | C | 0.515902 | 36.38448857 |
| Cooked vegetable intake    id:ukb-b-8089 | rs349062    | 448651 | -0.0089   | 0.001598 | 2.50E-08  | C | G | 0.39275  | 31.06003887 |
| Cooked vegetable intake    id:ukb-b-8089 | rs28711392  | 448651 | -0.01075  | 0.001632 | 4.60E-11  | C | T | 0.367132 | 43.34500363 |
| Cooked vegetable intake    id:ukb-b-8089 | rs10161952  | 448651 | -0.00958  | 0.001686 | 1.30E-08  | C | A | 0.31274  | 32.28898664 |
| Cooked vegetable intake    id:ukb-b-8089 | rs1421085   | 448651 | 0.010332  | 0.001591 | 8.30E-11  | C | T | 0.40346  | 42.1935412  |
| Cooked vegetable intake    id:ukb-b-8089 | rs838133    | 448651 | 0.011688  | 0.001615 | 4.50E-13  | G | A | 0.549575 | 52.39638412 |
| Cooked vegetable intake    id:ukb-b-8089 | rs34155012  | 448651 | 0.010558  | 0.001922 | 3.90E-08  | T | C | 0.227386 | 30.17541854 |
| Dried fruit intake    id:ukb-b-16576     | rs261809    | 421764 | -0.00963  | 0.001679 | 9.80E-09  | G | A | 0.540636 | 32.88612836 |
| Dried fruit intake    id:ukb-b-16576     | rs11586016  | 421764 | 0.009878  | 0.00173  | 1.10E-08  | C | G | 0.371004 | 32.59049647 |
| Dried fruit intake    id:ukb-b-16576     | rs12137234  | 421764 | 0.010205  | 0.001837 | 2.80E-08  | T | C | 0.303772 | 30.84666355 |
| Dried fruit intake    id:ukb-b-16576     | rs72720396  | 421764 | 0.011427  | 0.001985 | 8.70E-09  | G | A | 0.229157 | 33.1227234  |
| Dried fruit intake    id:ukb-b-16576     | rs11811826  | 421764 | 0.013218  | 0.002006 | 4.40E-11  | A | T | 0.224231 | 43.42532711 |
| Dried fruit intake    id:ukb-b-16576     | rs3101339   | 421764 | 0.01426   | 0.001705 | 6.20E-17  | C | A | 0.603285 | 69.90778136 |
| Dried fruit intake    id:ukb-b-16576     | rs75641275  | 421764 | -0.01416  | 0.002385 | 2.90E-09  | C | A | 0.143372 | 35.25039016 |
| Dried fruit intake    id:ukb-b-16576     | rs7582086   | 421764 | -0.00963  | 0.001674 | 8.80E-09  | T | G | 0.468273 | 33.08863044 |
| Dried fruit intake    id:ukb-b-16576     | rs7599488   | 421764 | -0.01042  | 0.001687 | 6.70E-10  | T | C | 0.426408 | 38.10416437 |
| Dried fruit intake    id:ukb-b-16576     | rs4149513   | 421764 | 0.01173   | 0.001671 | 2.20E-12  | A | G | 0.493537 | 49.25387744 |
| Dried fruit intake    id:ukb-b-16576     | rs17184707  | 421764 | -0.01144  | 0.00204  | 2.10E-08  | T | C | 0.212811 | 31.4340695  |
| Dried fruit intake    id:ukb-b-16576     | rs4269101   | 421764 | -0.01381  | 0.001859 | 1.10E-13  | G | T | 0.718948 | 55.17269195 |
| Dried fruit intake    id:ukb-b-16576     | rs11720884  | 421764 | 0.01118   | 0.001936 | 7.60E-09  | G | A | 0.250137 | 33.3623011  |
| Dried fruit intake    id:ukb-b-16576     | rs57499472  | 421764 | 0.009912  | 0.001719 | 8.10E-09  | C | T | 0.404131 | 33.26248192 |
| Dried fruit intake    id:ukb-b-16576     | rs10026792  | 421764 | 0.010847  | 0.001842 | 3.90E-09  | A | G | 0.290404 | 34.6623926  |
| Dried fruit intake    id:ukb-b-16576     | rs1648404   | 421764 | 0.009416  | 0.001674 | 1.80E-08  | T | C | 0.476112 | 31.65486917 |
| Dried fruit intake    id:ukb-b-16576     | rs746868    | 421764 | -0.01291  | 0.001715 | 5.20E-14  | G | C | 0.614662 | 56.65843301 |
| Dried fruit intake    id:ukb-b-16576     | rs9385269   | 421764 | 0.012067  | 0.001682 | 7.20E-13  | T | C | 0.524565 | 51.48207338 |
| Dried fruit intake    id:ukb-b-16576     | rs2328887   | 421764 | 0.018948  | 0.002776 | 8.80E-12  | C | T | 0.899467 | 46.58811024 |
| Dried fruit intake    id:ukb-b-16576     | rs2533273   | 421764 | -0.00988  | 0.001677 | 3.90E-09  | A | C | 0.48453  | 34.6797068  |
| Dried fruit intake    id:ukb-b-16576     | rs7808471   | 421764 | -0.01154  | 0.001786 | 1.10E-10  | C | T | 0.322136 | 41.71989351 |
| Dried fruit intake    id:ukb-b-16576     | rs11772627  | 421764 | 0.018334  | 0.002171 | 3.00E-17  | C | G | 0.18202  | 71.31638696 |
| Dried fruit intake    id:ukb-b-16576     | rs7829800   | 421764 | -0.01045  | 0.001787 | 5.10E-09  | G | A | 0.671041 | 34.16898975 |
| Dried fruit intake    id:ukb-b-16576     | rs10740991  | 421764 | 0.016739  | 0.001857 | 2.00E-19  | C | G | 0.717606 | 81.23296683 |
| Dried fruit intake    id:ukb-b-16576     | rs7916868   | 421764 | 0.009607  | 0.001672 | 9.10E-09  | T | A | 0.503499 | 33.03022654 |
| Dried fruit intake    id:ukb-b-16576     | rs893856    | 421764 | -0.01336  | 0.002349 | 1.30E-08  | A | G | 0.148988 | 32.34646694 |
| Dried fruit intake    id:ukb-b-16576     | rs10896126  | 421764 | -0.01501  | 0.001819 | 1.60E-16  | G | A | 0.303582 | 68.0686904  |
| Dried fruit intake    id:ukb-b-16576     | rs11037497  | 421764 | 0.01044   | 0.001684 | 5.70E-10  | C | G | 0.446175 | 38.41200163 |
| Dried fruit intake    id:ukb-b-16576     | rs1622515   | 421764 | 0.009917  | 0.001671 | 2.90E-09  | G | A | 0.484704 | 35.23253812 |
| Dried fruit intake    id:ukb-b-16576     | rs3764002   | 421764 | 0.013122  | 0.001901 | 5.10E-12  | T | C | 0.261416 | 47.6529239  |
| Dried fruit intake    id:ukb-b-16576     | rs4140799   | 421764 | 0.009457  | 0.001678 | 1.80E-08  | A | G | 0.531856 | 31.7430057  |
| Dried fruit intake    id:ukb-b-16576     | rs34162196  | 421764 | -0.02236  | 0.002772 | 7.10E-16  | T | C | 0.101001 | 65.09778077 |
| Dried fruit intake    id:ukb-b-16576     | rs10129747  | 421764 | 0.009359  | 0.001681 | 2.60E-08  | G | A | 0.530254 | 30.98781751 |
| Dried fruit intake    id:ukb-b-16576     | rs1797235   | 421764 | -0.01002  | 0.001742 | 8.90E-09  | C | G | 0.374623 | 33.07627952 |
| Dried fruit intake    id:ukb-b-16576     | rs11632215  | 421764 | -0.01414  | 0.002584 | 4.40E-08  | C | A | 0.120179 | 29.96285118 |
| Dried fruit intake    id:ukb-b-16576     | rs862227    | 421764 | -0.00916  | 0.001672 | 4.30E-08  | G | A | 0.458327 | 30.03012213 |
| Dried fruit intake    id:ukb-b-16576     | rs1582322   | 421764 | 0.009943  | 0.001716 | 6.80E-09  | G | A | 0.604805 | 33.58824381 |
| Dried fruit intake    id:ukb-b-16576     | rs62084586  | 421764 | 0.013395  | 0.002262 | 3.20E-09  | C | T | 0.165729 | 35.07309892 |
| Dried fruit intake    id:ukb-b-16576     | rs8081370   | 421764 | -0.01667  | 0.002938 | 1.40E-08  | T | C | 0.910232 | 32.18142153 |
| Dried fruit intake    id:ukb-b-16576     | rs4800488   | 421764 | 0.011984  | 0.001672 | 7.70E-13  | A | C | 0.489858 | 51.36788358 |

|                                      |             |        |          |          |          |   |   |          |             |
|--------------------------------------|-------------|--------|----------|----------|----------|---|---|----------|-------------|
| Dried fruit intake    id:ukb-b-16576 | rs17175518  | 421764 | 0.011496 | 0.001975 | 5.90E-09 | A | C | 0.232775 | 33.87761691 |
| Dried fruit intake    id:ukb-b-16576 | rs11152349  | 421764 | 0.009912 | 0.001818 | 4.90E-08 | A | G | 0.302856 | 29.73987255 |
| Dried fruit intake    id:ukb-b-16576 | rs429358    | 421764 | 0.019945 | 0.002314 | 6.70E-18 | C | T | 0.154208 | 74.31256412 |
| Fresh fruit intake    id:ukb-b-3881  | rs2790688   | 446462 | 0.011447 | 0.001696 | 1.50E-11 | T | C | 0.154068 | 45.54437451 |
| Fresh fruit intake    id:ukb-b-3881  | rs559734    | 446462 | 0.007768 | 0.001361 | 1.10E-08 | C | G | 0.711817 | 32.58736969 |
| Fresh fruit intake    id:ukb-b-3881  | rs12044599  | 446462 | 0.009421 | 0.001503 | 3.70E-10 | G | A | 0.21008  | 39.27152797 |
| Fresh fruit intake    id:ukb-b-3881  | rs7554485   | 446462 | -0.00801 | 0.001254 | 1.70E-10 | C | T | 0.611539 | 40.79323752 |
| Fresh fruit intake    id:ukb-b-3881  | rs1620977   | 446462 | -0.01317 | 0.001378 | 1.10E-21 | G | A | 0.730517 | 91.45257352 |
| Fresh fruit intake    id:ukb-b-3881  | rs2867113   | 446462 | -0.01386 | 0.00196  | 1.50E-12 | A | G | 0.130942 | 49.99667651 |
| Fresh fruit intake    id:ukb-b-3881  | rs17049185  | 446462 | 0.00804  | 0.00139  | 7.30E-09 | T | G | 0.267872 | 33.44435024 |
| Fresh fruit intake    id:ukb-b-3881  | rs11896330  | 446462 | -0.00845 | 0.001274 | 3.40E-11 | A | G | 0.632839 | 43.91942955 |
| Fresh fruit intake    id:ukb-b-3881  | rs72974263  | 446462 | 0.007387 | 0.001312 | 1.80E-08 | T | C | 0.318282 | 31.67901755 |
| Fresh fruit intake    id:ukb-b-3881  | rs817223    | 446462 | -0.00727 | 0.001223 | 2.80E-09 | C | T | 0.481314 | 35.30441703 |
| Fresh fruit intake    id:ukb-b-3881  | rs4953150   | 446462 | -0.00844 | 0.001293 | 6.60E-11 | T | C | 0.344088 | 42.62079328 |
| Fresh fruit intake    id:ukb-b-3881  | rs10192394  | 446462 | -0.00766 | 0.001229 | 4.50E-10 | T | C | 0.528785 | 38.87538231 |
| Fresh fruit intake    id:ukb-b-3881  | rs1375566   | 446462 | -0.00783 | 0.001266 | 6.10E-10 | A | G | 0.627412 | 38.2895062  |
| Fresh fruit intake    id:ukb-b-3881  | rs13072255  | 446462 | 0.00898  | 0.001224 | 2.10E-13 | C | A | 0.493966 | 53.86675793 |
| Fresh fruit intake    id:ukb-b-3881  | rs1356292   | 446462 | 0.009175 | 0.001553 | 3.50E-09 | T | C | 0.807546 | 34.89052938 |
| Fresh fruit intake    id:ukb-b-3881  | rs12641371  | 446462 | 0.007913 | 0.001234 | 1.40E-10 | T | C | 0.433148 | 41.14755406 |
| Fresh fruit intake    id:ukb-b-3881  | rs10064431  | 446462 | -0.00757 | 0.001224 | 6.00E-10 | C | T | 0.522495 | 38.31130962 |
| Fresh fruit intake    id:ukb-b-3881  | rs149449    | 446462 | 0.007289 | 0.001221 | 2.40E-09 | A | G | 0.489167 | 35.65565571 |
| Fresh fruit intake    id:ukb-b-3881  | rs2143081   | 446462 | 0.008321 | 0.001229 | 1.30E-11 | A | G | 0.539822 | 45.84402103 |
| Fresh fruit intake    id:ukb-b-3881  | rs586346    | 446462 | -0.00692 | 0.001266 | 4.50E-08 | C | T | 0.635353 | 29.900247   |
| Fresh fruit intake    id:ukb-b-3881  | rs994270    | 446462 | 0.013259 | 0.001444 | 4.20E-20 | G | C | 0.235126 | 84.31805282 |
| Fresh fruit intake    id:ukb-b-3881  | rs329274    | 446462 | 0.006818 | 0.001228 | 2.80E-08 | G | A | 0.485636 | 30.82219272 |
| Fresh fruit intake    id:ukb-b-3881  | rs10271924  | 446462 | -0.00705 | 0.001256 | 2.00E-08 | T | C | 0.492595 | 31.48147035 |
| Fresh fruit intake    id:ukb-b-3881  | rs10249294  | 446462 | 0.019564 | 0.001263 | 4.10E-54 | A | G | 0.372973 | 239.9397296 |
| Fresh fruit intake    id:ukb-b-3881  | rs12536253  | 446462 | -0.00816 | 0.001416 | 8.30E-09 | C | G | 0.24901  | 33.20467771 |
| Fresh fruit intake    id:ukb-b-3881  | rs7818437   | 446462 | -0.00805 | 0.001453 | 3.00E-08 | C | T | 0.235903 | 30.70109476 |
| Fresh fruit intake    id:ukb-b-3881  | rs1866823   | 446462 | 0.007431 | 0.001241 | 2.10E-09 | A | G | 0.544469 | 35.87619883 |
| Fresh fruit intake    id:ukb-b-3881  | rs6475724   | 446462 | 0.007722 | 0.001374 | 1.90E-08 | T | C | 0.727296 | 31.57959681 |
| Fresh fruit intake    id:ukb-b-3881  | rs7869969   | 446462 | 0.007567 | 0.001299 | 5.70E-09 | G | A | 0.330836 | 33.92702255 |
| Fresh fruit intake    id:ukb-b-3881  | rs4302893   | 446462 | 0.007389 | 0.0013   | 1.30E-08 | A | G | 0.334189 | 32.3227321  |
| Fresh fruit intake    id:ukb-b-3881  | rs2093654   | 446462 | 0.007129 | 0.001259 | 1.50E-08 | G | A | 0.388133 | 32.07771602 |
| Fresh fruit intake    id:ukb-b-3881  | rs11248509  | 446462 | 0.00733  | 0.001268 | 7.40E-09 | T | A | 0.371237 | 33.41416379 |
| Fresh fruit intake    id:ukb-b-3881  | rs9919429   | 446462 | -0.00672 | 0.001223 | 3.80E-08 | G | A | 0.486008 | 30.22594293 |
| Fresh fruit intake    id:ukb-b-3881  | rs10828266  | 446462 | 0.012364 | 0.001357 | 8.10E-20 | G | A | 0.715634 | 83.02290993 |
| Fresh fruit intake    id:ukb-b-3881  | rs12780952  | 446462 | 0.007475 | 0.001354 | 3.40E-08 | A | G | 0.286382 | 30.4919584  |
| Fresh fruit intake    id:ukb-b-3881  | rs10840126  | 446462 | -0.00772 | 0.001286 | 1.90E-09 | G | A | 0.376121 | 36.02781772 |
| Fresh fruit intake    id:ukb-b-3881  | rs10838724  | 446462 | 0.009011 | 0.001283 | 2.10E-12 | T | G | 0.367992 | 49.34428076 |
| Fresh fruit intake    id:ukb-b-3881  | rs11032362  | 446462 | 0.012393 | 0.001213 | 5.30E-09 | A | G | 0.090976 | 34.06327143 |
| Fresh fruit intake    id:ukb-b-3881  | rs60452247  | 446462 | 0.00797  | 0.001269 | 3.40E-10 | A | G | 0.363079 | 39.42217772 |
| Fresh fruit intake    id:ukb-b-3881  | rs7982441   | 446462 | -0.00841 | 0.001376 | 9.80E-10 | C | T | 0.731883 | 37.37086732 |
| Fresh fruit intake    id:ukb-b-3881  | rs9517948   | 446462 | 0.006953 | 0.001233 | 1.70E-08 | T | C | 0.451352 | 31.80743346 |
| Fresh fruit intake    id:ukb-b-3881  | rs12885598  | 446462 | 0.007515 | 0.001247 | 1.70E-09 | A | G | 0.596671 | 36.30087134 |
| Fresh fruit intake    id:ukb-b-3881  | rs34162196  | 446462 | -0.01814 | 0.00203  | 4.00E-19 | T | C | 0.1008   | 79.88997008 |
| Fresh fruit intake    id:ukb-b-3881  | rs28479795  | 446462 | 0.011232 | 0.001473 | 2.50E-14 | T | C | 0.221473 | 58.11313644 |
| Fresh fruit intake    id:ukb-b-3881  | rs62051554  | 446462 | 0.011612 | 0.001981 | 4.60E-09 | A | G | 0.108545 | 34.34326853 |
| Fresh fruit intake    id:ukb-b-3881  | rs8622227   | 446462 | -0.01015 | 0.001224 | 1.10E-16 | G | A | 0.457858 | 68.70250671 |
| Fresh fruit intake    id:ukb-b-3881  | rs1051547   | 446462 | -0.00758 | 0.001242 | 1.10E-09 | C | T | 0.561537 | 37.22384605 |
| Fresh fruit intake    id:ukb-b-3881  | rs139042899 | 446462 | 0.035995 | 0.006081 | 3.20E-09 | C | A | 0.013469 | 35.03690849 |
| Fresh fruit intake    id:ukb-b-3881  | rs2048522   | 446462 | 0.009563 | 0.001248 | 1.80E-14 | T | A | 0.434968 | 58.73751713 |
| Fresh fruit intake    id:ukb-b-3881  | rs73455661  | 446462 | 0.010294 | 0.001362 | 4.10E-14 | G | A | 0.279338 | 57.10441675 |
| Fresh fruit intake    id:ukb-b-3881  | rs8095324   | 446462 | -0.00695 | 0.001249 | 2.70E-08 | G | A | 0.404041 | 30.9271624  |
| Fresh fruit intake    id:ukb-b-3881  | rs11085749  | 446462 | -0.00773 | 0.001255 | 7.10E-10 | A | G | 0.387076 | 37.98711232 |
| Fresh fruit intake    id:ukb-b-3881  | rs2302593   | 446462 | 0.008528 | 0.001223 | 3.10E-12 | G | C | 0.486625 | 48.62081118 |
| Fresh fruit intake    id:ukb-b-3881  | rs739320    | 446462 | -0.009   | 0.001277 | 1.90E-12 | C | T | 0.60575  | 49.63512973 |
| Fresh fruit intake    id:ukb-b-3881  | rs78537042  | 446462 | -0.01193 | 0.002184 | 4.80E-08 | A | C | 0.086801 | 29.80916441 |
| Lamb/mutton intake    id:ukb-b-14179 | rs7550173   | 460006 | -0.00912 | 0.001502 | 1.30E-09 | T | A | 0.610281 | 36.88458002 |
| Lamb/mutton intake    id:ukb-b-14179 | rs660880    | 460006 | -0.00903 | 0.001464 | 6.80E-10 | A | G | 0.51281  | 38.06426421 |
| Lamb/mutton intake    id:ukb-b-14179 | rs56394517  | 460006 | -0.01377 | 0.002491 | 3.20E-08 | G | A | 0.09584  | 30.57354321 |
| Lamb/mutton intake    id:ukb-b-14179 | rs139237013 | 460006 | 0.018899 | 0.00314  | 1.80E-09 | A | G | 0.057668 | 36.22383231 |
| Lamb/mutton intake    id:ukb-b-14179 | rs2222760   | 460006 | -0.00909 | 0.001637 | 2.80E-08 | A | G | 0.28089  | 30.84381164 |
| Lamb/mutton intake    id:ukb-b-14179 | rs62106258  | 460006 | 0.02163  | 0.003402 | 2.00E-10 | C | T | 0.048562 | 40.4369077  |
| Lamb/mutton intake    id:ukb-b-14179 | rs2678900   | 460006 | 0.010084 | 0.001481 | 9.90E-12 | G | T | 0.427924 | 46.35307872 |
| Lamb/mutton intake    id:ukb-b-14179 | rs2140714   | 460006 | -0.00852 | 0.001476 | 7.70E-09 | G | C | 0.557738 | 33.34108908 |
| Lamb/mutton intake    id:ukb-b-14179 | rs12634740  | 460006 | -0.01009 | 0.001697 | 2.80E-09 | G | T | 0.252078 | 35.3238662  |
| Lamb/mutton intake    id:ukb-b-14179 | rs6829572   | 460006 | 0.008401 | 0.001474 | 1.20E-08 | A | G | 0.456717 | 32.48116867 |
| Lamb/mutton intake    id:ukb-b-14179 | rs16891982  | 460006 | -0.02427 | 0.004364 | 2.70E-08 | G | C | 0.972143 | 30.91921278 |
| Lamb/mutton intake    id:ukb-b-14179 | rs11743441  | 460006 | -0.00884 | 0.001486 | 2.70E-09 | T | G | 0.574343 | 35.4081582  |
| Lamb/mutton intake    id:ukb-b-14179 | rs7447465   | 460006 | 0.009582 | 0.001506 | 2.00E-10 | C | T | 0.619449 | 40.47399311 |
| Lamb/mutton intake    id:ukb-b-14179 | rs62398404  | 460006 | 0.012915 | 0.002194 | 4.00E-09 | T | C | 0.127211 | 34.64173075 |
| Lamb/mutton intake    id:ukb-b-14179 | rs994270    | 460006 | 0.00982  | 0.001729 | 1.40E-08 | G | C | 0.234851 | 32.24173634 |
| Lamb/mutton intake    id:ukb-b-14179 | rs35797675  | 460006 | -0.01085 | 0.001793 | 1.40E-09 | G | T | 0.215928 | 36.60067834 |
| Lamb/mutton intake    id:ukb-b-14179 | rs4272399   | 460006 | -0.00924 | 0.001576 | 4.50E-09 | A | C | 0.321491 | 34.40571043 |
| Lamb/mutton intake    id:ukb-b-14179 | rs276453    | 460006 | -0.01424 | 0.001467 | 2.90E-22 | C | A | 0.488356 | 94.15438988 |
| Lamb/mutton intake    id:ukb-b-14179 | rs1556147   | 460006 | 0.009101 | 0.001559 | 5.30E-09 | T | A | 0.671626 | 34.07775792 |
| Lamb/mutton intake    id:ukb-b-14179 | rs673696    | 460006 | 0.015821 | 0.002682 | 3.70E-09 | T | C | 0.080995 | 34.79576423 |
| Lamb/mutton intake    id:ukb-b-14179 | rs4489752   | 460006 | 0.013811 | 0.001976 | 2.80E-12 | T | G | 0.836007 | 48.85825051 |
| Lamb/mutton intake    id:ukb-b-14179 | rs6581296   | 460006 | 0.01002  | 0.001824 | 4.00E-08 | G | C | 0.794714 | 30.16615614 |
| Lamb/mutton intake    id:ukb-b-14179 | rs3105056   | 460006 | -0.01162 | 0.001649 | 1.80E-12 | C | T | 0.732738 | 49.71869219 |
| Lamb/mutton intake    id:ukb-b-14179 | rs1958801   | 460006 | -0.00894 | 0.001617 | 3.20E-08 | G | A | 0.287998 | 30.57536372 |
| Lamb/mutton intake    id:ukb-b-14179 | rs55813438  | 460006 | -0.01142 | 0.001735 | 4.70E-11 | A | G | 0.763165 | 43.3000708  |
| Lamb/mutton intake    id:ukb-b-14179 | rs2726033   | 460006 | -0.00949 | 0.00148  | 1.50E-10 | G | A | 0.422384 | 41.09066335 |
| Lamb/mutton intake    id:ukb-b-14179 | rs3964074   | 460006 | -0.00814 | 0.001472 | 3.20E-08 | C | T | 0.547043 | 30.58063405 |
| Lamb/mutton intake    id:ukb-b-14179 | rs2926119   | 460006 | 0.008111 | 0.001482 | 4.40E-08 | A | C | 0.569417 | 29.96387466 |
| Lamb/mutton intake    id:ukb-b-14179 | rs429358    | 460006 | -0.0182  | 0.002027 | 2.70E-19 | C | T | 0.154171 | 80.61155081 |

|                                        |             |        |          |          |          |   |   |          |             |
|----------------------------------------|-------------|--------|----------|----------|----------|---|---|----------|-------------|
| Lamb/mutton intake    id:ukb-b-14179   | rs17270057  | 460006 | 0.012653 | 0.002309 | 4.30E-08 | C | T | 0.113347 | 30.03108543 |
| Lamb/mutton intake    id:ukb-b-14179   | rs136548    | 460006 | 0.009532 | 0.001512 | 2.90E-10 | T | C | 0.376668 | 39.73257881 |
| Lamb/mutton intake    id:ukb-b-14179   | rs11090045  | 460006 | -0.01068 | 0.001607 | 3.00E-11 | A | G | 0.307145 | 44.15968432 |
| Non-oily fish intake    id:ukb-b-17627 | rs16822430  | 460880 | 0.011634 | 0.00192  | 1.40E-09 | C | T | 0.23321  | 36.72008016 |
| Non-oily fish intake    id:ukb-b-17627 | rs1260326   | 460880 | -0.00955 | 0.001655 | 7.90E-09 | C | T | 0.604249 | 33.31004524 |
| Non-oily fish intake    id:ukb-b-17627 | rs11680516  | 460880 | 0.012284 | 0.002028 | 1.40E-09 | C | T | 0.202388 | 36.68036582 |
| Non-oily fish intake    id:ukb-b-17627 | rs3799077   | 460880 | -0.01073 | 0.001758 | 1.00E-09 | G | T | 0.309993 | 37.30026154 |
| Non-oily fish intake    id:ukb-b-17627 | rs4318925   | 460880 | -0.01504 | 0.002121 | 1.30E-12 | T | C | 0.177245 | 50.28105253 |
| Non-oily fish intake    id:ukb-b-17627 | rs6957745   | 460880 | -0.01218 | 0.002023 | 1.80E-09 | C | T | 0.202978 | 36.23310369 |
| Non-oily fish intake    id:ukb-b-17627 | rs17317920  | 460880 | 0.00906  | 0.001631 | 2.80E-08 | G | A | 0.479238 | 30.85103737 |
| Non-oily fish intake    id:ukb-b-17627 | rs35287743  | 460880 | -0.01774 | 0.002552 | 3.60E-12 | T | G | 0.11583  | 48.30599625 |
| Non-oily fish intake    id:ukb-b-17627 | rs7148387   | 460880 | -0.00931 | 0.00165  | 1.70E-08 | G | A | 0.590715 | 31.80433145 |
| Non-oily fish intake    id:ukb-b-17627 | rs56094641  | 460880 | 0.012588 | 0.001651 | 2.50E-14 | G | A | 0.404619 | 58.12229223 |
| Non-oily fish intake    id:ukb-b-17627 | rs838133    | 460880 | 0.016184 | 0.001676 | 4.70E-22 | G | A | 0.549409 | 93.21679306 |
| Oily fish intake    id:ukb-b-2209      | rs973526    | 460443 | -0.01151 | 0.00193  | 2.50E-09 | T | C | 0.513307 | 35.56154676 |
| Oily fish intake    id:ukb-b-2209      | rs45501495  | 460443 | 0.01568  | 0.002257 | 3.70E-12 | T | C | 0.236013 | 48.26091912 |
| Oily fish intake    id:ukb-b-2209      | rs55930451  | 460443 | -0.01705 | 0.003076 | 2.90E-08 | T | C | 0.108001 | 30.74453656 |
| Oily fish intake    id:ukb-b-2209      | rs55985303  | 460443 | 0.012974 | 0.002236 | 6.60E-09 | A | G | 0.241079 | 33.65669436 |
| Oily fish intake    id:ukb-b-2209      | rs17050031  | 460443 | -0.01205 | 0.001921 | 3.50E-10 | T | C | 0.4801   | 39.35476772 |
| Oily fish intake    id:ukb-b-2209      | rs275160    | 460443 | 0.012119 | 0.002101 | 8.00E-09 | C | T | 0.700597 | 33.27236476 |
| Oily fish intake    id:ukb-b-2209      | rs13070166  | 460443 | 0.014211 | 0.002278 | 4.40E-10 | A | T | 0.228586 | 38.91072627 |
| Oily fish intake    id:ukb-b-2209      | rs114497213 | 460443 | 0.027323 | 0.004236 | 1.10E-10 | T | G | 0.05481  | 41.60243148 |
| Oily fish intake    id:ukb-b-2209      | rs10513136  | 460443 | -0.02332 | 0.003863 | 1.60E-09 | A | G | 0.065424 | 36.45114017 |
| Oily fish intake    id:ukb-b-2209      | rs1876245   | 460443 | 0.015116 | 0.001931 | 5.00E-15 | C | T | 0.431482 | 61.26631478 |
| Oily fish intake    id:ukb-b-2209      | rs10510554  | 460443 | 0.011045 | 0.001936 | 1.20E-08 | C | T | 0.569277 | 32.53327454 |
| Oily fish intake    id:ukb-b-2209      | rs905575    | 460443 | 0.013882 | 0.002519 | 3.60E-08 | G | C | 0.82397  | 30.36785772 |
| Oily fish intake    id:ukb-b-2209      | rs9841174   | 460443 | 0.014778 | 0.00198  | 8.50E-14 | C | T | 0.373913 | 55.69255701 |
| Oily fish intake    id:ukb-b-2209      | rs1201289   | 460443 | -0.01073 | 0.00196  | 4.40E-08 | G | T | 0.394525 | 29.96577668 |
| Oily fish intake    id:ukb-b-2209      | rs7683782   | 460443 | 0.014478 | 0.002574 | 1.90E-08 | G | C | 0.833405 | 31.63540776 |
| Oily fish intake    id:ukb-b-2209      | rs10076975  | 460443 | 0.011239 | 0.001967 | 1.10E-08 | C | T | 0.381413 | 32.64293677 |
| Oily fish intake    id:ukb-b-2209      | rs10061973  | 460443 | -0.01085 | 0.001916 | 1.50E-08 | T | G | 0.5139   | 32.08083262 |
| Oily fish intake    id:ukb-b-2209      | rs16891727  | 460443 | -0.02372 | 0.00284  | 6.80E-17 | A | C | 0.129814 | 69.74043288 |
| Oily fish intake    id:ukb-b-2209      | rs34555420  | 460443 | -0.02377 | 0.003219 | 1.50E-13 | T | G | 0.097821 | 54.51388329 |
| Oily fish intake    id:ukb-b-2209      | rs12663865  | 460443 | 0.012772 | 0.002232 | 1.10E-08 | A | G | 0.758185 | 32.73238742 |
| Oily fish intake    id:ukb-b-2209      | rs4869859   | 460443 | 0.01401  | 0.001922 | 3.10E-13 | C | T | 0.449939 | 53.12824506 |
| Oily fish intake    id:ukb-b-2209      | rs11767283  | 460443 | 0.017674 | 0.002319 | 2.50E-14 | G | A | 0.221709 | 58.06074287 |
| Oily fish intake    id:ukb-b-2209      | rs6465487   | 460443 | -0.01235 | 0.001956 | 2.70E-10 | G | A | 0.399814 | 39.87658965 |
| Oily fish intake    id:ukb-b-2209      | rs11986122  | 460443 | 0.014817 | 0.001949 | 2.90E-14 | G | C | 0.422568 | 57.17687487 |
| Oily fish intake    id:ukb-b-2209      | rs790564    | 460443 | 0.014691 | 0.002148 | 7.90E-12 | C | A | 0.722952 | 46.78945758 |
| Oily fish intake    id:ukb-b-2209      | rs552234    | 460443 | -0.01165 | 0.001913 | 1.10E-09 | A | G | 0.495449 | 37.08907567 |
| Oily fish intake    id:ukb-b-2209      | rs9886779   | 460443 | -0.01072 | 0.001929 | 2.70E-08 | A | T | 0.439213 | 30.8942254  |
| Oily fish intake    id:ukb-b-2209      | rs10828250  | 460443 | -0.02015 | 0.002073 | 2.60E-22 | G | C | 0.309332 | 94.40954499 |
| Oily fish intake    id:ukb-b-2209      | rs703987    | 460443 | 0.011122 | 0.001974 | 1.70E-08 | C | G | 0.615005 | 31.75580212 |
| Oily fish intake    id:ukb-b-2209      | rs61882686  | 460443 | 0.019756 | 0.003425 | 8.00E-09 | A | C | 0.085234 | 23.36273802 |
| Oily fish intake    id:ukb-b-2209      | rs4278546   | 460443 | 0.012556 | 0.001938 | 9.30E-11 | G | A | 0.441085 | 41.96948001 |
| Oily fish intake    id:ukb-b-2209      | rs2374424   | 460443 | -0.01144 | 0.001956 | 4.90E-09 | G | A | 0.601525 | 34.22593037 |
| Oily fish intake    id:ukb-b-2209      | rs510161    | 460443 | -0.0113  | 0.002066 | 4.50E-08 | G | C | 0.31037  | 29.91009679 |
| Oily fish intake    id:ukb-b-2209      | rs631490    | 460443 | -0.01514 | 0.002103 | 6.00E-13 | C | G | 0.709106 | 51.85084921 |
| Oily fish intake    id:ukb-b-2209      | rs303817    | 460443 | 0.01358  | 0.00221  | 8.00E-10 | G | A | 0.751146 | 37.76992884 |
| Oily fish intake    id:ukb-b-2209      | rs35287743  | 460443 | -0.02822 | 0.003011 | 7.00E-21 | T | G | 0.115869 | 87.85758202 |
| Oily fish intake    id:ukb-b-2209      | rs9597870   | 460443 | -0.01274 | 0.00223  | 1.10E-08 | G | T | 0.245844 | 32.05006017 |
| Oily fish intake    id:ukb-b-2209      | rs3124402   | 460443 | -0.022   | 0.002157 | 1.90E-24 | G | A | 0.733261 | 104.0872851 |
| Oily fish intake    id:ukb-b-2209      | rs12855717  | 460443 | -0.01223 | 0.001923 | 2.00E-10 | T | C | 0.526774 | 40.45694357 |
| Oily fish intake    id:ukb-b-2209      | rs1361016   | 460443 | 0.014957 | 0.002653 | 1.70E-08 | G | T | 0.844853 | 31.7843574  |
| Oily fish intake    id:ukb-b-2209      | rs9301837   | 460443 | -0.01574 | 0.00273  | 8.10E-09 | A | C | 0.143273 | 33.2426395  |
| Oily fish intake    id:ukb-b-2209      | rs4982738   | 460443 | 0.010861 | 0.001969 | 3.50E-08 | A | G | 0.582899 | 30.4139906  |
| Oily fish intake    id:ukb-b-2209      | rs12896749  | 460443 | -0.01096 | 0.001966 | 2.50E-08 | C | G | 0.384721 | 31.09911448 |
| Oily fish intake    id:ukb-b-2209      | rs1951286   | 460443 | -0.01458 | 0.001999 | 3.00E-13 | G | T | 0.644911 | 53.19581795 |
| Oily fish intake    id:ukb-b-2209      | rs28533540  | 460443 | 0.014642 | 0.001925 | 2.80E-14 | A | G | 0.534203 | 57.86880877 |
| Oily fish intake    id:ukb-b-2209      | rs1421085   | 460443 | 0.018481 | 0.001949 | 2.50E-21 | C | T | 0.40341  | 89.94279752 |
| Oily fish intake    id:ukb-b-2209      | rs11859365  | 460443 | 0.022567 | 0.002197 | 9.40E-25 | C | A | 0.253765 | 105.5277608 |
| Oily fish intake    id:ukb-b-2209      | rs9889161   | 460443 | -0.01332 | 0.002002 | 2.80E-11 | T | G | 0.357929 | 44.28980638 |
| Oily fish intake    id:ukb-b-2209      | rs28623270  | 460443 | -0.01783 | 0.002737 | 7.30E-11 | T | A | 0.14872  | 42.43688656 |
| Oily fish intake    id:ukb-b-2209      | rs2952140   | 460443 | -0.01068 | 0.001915 | 2.50E-08 | T | C | 0.482607 | 31.0867504  |
| Oily fish intake    id:ukb-b-2209      | rs4510068   | 460443 | -0.01301 | 0.001971 | 4.00E-11 | T | G | 0.402798 | 43.60078526 |
| Oily fish intake    id:ukb-b-2209      | rs7243428   | 460443 | -0.01298 | 0.002292 | 1.50E-08 | G | A | 0.224648 | 32.06030201 |
| Oily fish intake    id:ukb-b-2209      | rs9958909   | 460443 | 0.015762 | 0.002778 | 1.40E-08 | G | T | 0.139718 | 32.18944523 |
| Oily fish intake    id:ukb-b-2209      | rs59355765  | 460443 | -0.01625 | 0.00261  | 4.70E-10 | T | C | 0.160079 | 38.78434474 |
| Oily fish intake    id:ukb-b-2209      | rs4002471   | 460443 | -0.01924 | 0.001924 | 1.50E-23 | T | C | 0.547362 | 99.99896072 |
| Oily fish intake    id:ukb-b-2209      | rs7254235   | 460443 | -0.01063 | 0.00194  | 4.30E-08 | G | A | 0.577254 | 30.02216639 |
| Oily fish intake    id:ukb-b-2209      | rs75887709  | 460443 | -0.01591 | 0.002815 | 1.60E-08 | G | A | 0.13588  | 31.95052732 |
| Oily fish intake    id:ukb-b-2209      | rs12983532  | 460443 | -0.01339 | 0.002233 | 2.00E-09 | T | C | 0.251137 | 35.94371149 |
| Oily fish intake    id:ukb-b-2209      | rs6033437   | 460443 | 0.012468 | 0.00221  | 1.70E-08 | A | C | 0.257329 | 31.83613518 |
| Oily fish intake    id:ukb-b-2209      | rs6059844   | 460443 | 0.011    | 0.001915 | 9.20E-09 | G | A | 0.495121 | 33.01246762 |
| Oily fish intake    id:ukb-b-2209      | rs6089753   | 460443 | -0.01154 | 0.001918 | 1.80E-09 | T | C | 0.530967 | 36.19793605 |
| Oily fish intake    id:ukb-b-2209      | rs2827161   | 460443 | 0.010711 | 0.001937 | 3.20E-08 | G | T | 0.422842 | 30.57370271 |
| Oily fish intake    id:ukb-b-2209      | rs9606833   | 460443 | 0.016986 | 0.002231 | 2.70E-14 | C | T | 0.243593 | 57.97132923 |
| Pork intake    id:ukb-b-5640           | rs11211124  | 460162 | -0.00995 | 0.001754 | 1.40E-08 | C | T | 0.230603 | 32.19479408 |
| Pork intake    id:ukb-b-5640           | rs9973426   | 460162 | 0.011085 | 0.001937 | 1.00E-08 | G | A | 0.176598 | 32.75573161 |
| Pork intake    id:ukb-b-5640           | rs7641973   | 460162 | 0.008446 | 0.001541 | 4.20E-08 | A | G | 0.353362 | 30.04202564 |
| Pork intake    id:ukb-b-5640           | rs254152    | 460162 | -0.01043 | 0.001742 | 2.20E-09 | G | C | 0.23498  | 35.81825003 |
| Pork intake    id:ukb-b-5640           | rs9379832   | 460162 | -0.01147 | 0.001706 | 1.80E-11 | G | A | 0.255452 | 45.200144   |
| Pork intake    id:ukb-b-5640           | rs10972033  | 460162 | 0.008976 | 0.001479 | 1.30E-09 | T | G | 0.45643  | 36.85322886 |
| Pork intake    id:ukb-b-5640           | rs1355171   | 460162 | -0.01098 | 0.001477 | 1.00E-13 | A | C | 0.488844 | 55.29639177 |
| Pork intake    id:ukb-b-5640           | rs34161520  | 460162 | 0.011592 | 0.002021 | 9.60E-09 | G | C | 0.160381 | 32.91156654 |
| Pork intake    id:ukb-b-5640           | rs2387807   | 460162 | -0.01508 | 0.002748 | 4.10E-08 | T | C | 0.077893 | 30.12431625 |
| Pork intake    id:ukb-b-5640           | rs4146837   | 460162 | 0.008792 | 0.001494 | 4.00E-09 | T | C | 0.455561 | 34.61523839 |

|                                               |            |        |          |          |          |   |   |          |             |
|-----------------------------------------------|------------|--------|----------|----------|----------|---|---|----------|-------------|
| Pork intake    id:ukb-b-5640                  | rs3964074  | 460162 | -0.00895 | 0.001483 | 1.60E-09 | C | T | 0.546932 | 36.40632524 |
| Pork intake    id:ukb-b-5640                  | rs36124222 | 460162 | 0.008409 | 0.001501 | 2.10E-08 | C | T | 0.433239 | 31.39509867 |
| Pork intake    id:ukb-b-5640                  | rs12721051 | 460162 | -0.01236 | 0.001887 | 5.60E-11 | G | C | 0.188393 | 42.94470595 |
| Pork intake    id:ukb-b-5640                  | rs838133   | 460162 | 0.010894 | 0.001525 | 9.00E-13 | G | A | 0.549354 | 51.0408865  |
| Poultry intake    id:ukb-b-8006               | rs9997448  | 461900 | -0.01046 | 0.001883 | 2.70E-08 | T | C | 0.369236 | 30.88872486 |
| Poultry intake    id:ukb-b-8006               | rs7829800  | 461900 | 0.011458 | 0.001943 | 3.70E-09 | G | A | 0.670759 | 34.78147808 |
| Poultry intake    id:ukb-b-8006               | rs7046351  | 461900 | 0.011075 | 0.001817 | 1.10E-09 | A | T | 0.509739 | 37.13120108 |
| Poultry intake    id:ukb-b-8006               | rs1051730  | 461900 | -0.01088 | 0.001929 | 1.70E-08 | A | G | 0.331381 | 31.77633978 |
| Poultry intake    id:ukb-b-8006               | rs9923768  | 461900 | 0.010512 | 0.001859 | 1.60E-08 | A | G | 0.59853  | 31.97727011 |
| Poultry intake    id:ukb-b-8006               | rs2565017  | 461900 | 0.010952 | 0.001882 | 5.90E-09 | A | G | 0.372697 | 33.85768114 |
| Poultry intake    id:ukb-b-8006               | rs2965200  | 461900 | -0.01042 | 0.001901 | 4.20E-08 | A | G | 0.640011 | 30.04667768 |
| Poultry intake    id:ukb-b-8006               | rs2426440  | 461900 | 0.011218 | 0.002053 | 4.70E-08 | G | A | 0.732602 | 29.84918243 |
| Processed meat intake    id:ukb-b-6324        | rs7531118  | 461981 | -0.01407 | 0.002113 | 2.80E-11 | C | T | 0.531133 | 44.33158973 |
| Processed meat intake    id:ukb-b-6324        | rs77165542 | 461981 | 0.033879 | 0.005725 | 3.30E-09 | T | C | 0.035496 | 35.01844797 |
| Processed meat intake    id:ukb-b-6324        | rs11887120 | 461981 | 0.011962 | 0.00216  | 3.10E-08 | T | C | 0.397683 | 30.65733918 |
| Processed meat intake    id:ukb-b-6324        | rs11894162 | 461981 | 0.012049 | 0.002107 | 1.10E-08 | T | C | 0.547464 | 32.70197435 |
| Processed meat intake    id:ukb-b-6324        | rs4077924  | 461981 | 0.012499 | 0.002285 | 4.50E-08 | C | T | 0.701892 | 29.92808497 |
| Processed meat intake    id:ukb-b-6324        | rs3762621  | 461981 | -0.01499 | 0.002272 | 3.60E-08 | T | C | 0.183451 | 30.37723627 |
| Processed meat intake    id:ukb-b-6324        | rs9809856  | 461981 | 0.013289 | 0.0021   | 2.50E-10 | G | A | 0.475881 | 40.05556924 |
| Processed meat intake    id:ukb-b-6324        | rs2873054  | 461981 | 0.013996 | 0.00219  | 1.60E-10 | C | A | 0.353276 | 40.84724346 |
| Processed meat intake    id:ukb-b-6324        | rs6786550  | 461981 | 0.012187 | 0.002174 | 2.10E-08 | C | T | 0.635043 | 31.42314922 |
| Processed meat intake    id:ukb-b-6324        | rs6765179  | 461981 | -0.01276 | 0.002266 | 1.80E-08 | A | G | 0.309968 | 31.7087382  |
| Processed meat intake    id:ukb-b-6324        | rs10454812 | 461981 | -0.01996 | 0.003442 | 6.70E-09 | C | A | 0.103032 | 33.62616394 |
| Processed meat intake    id:ukb-b-6324        | rs2029401  | 461981 | 0.014631 | 0.002129 | 6.30E-12 | G | A | 0.586212 | 47.2201083  |
| Processed meat intake    id:ukb-b-6324        | rs1422192  | 461981 | 0.016968 | 0.002871 | 3.40E-09 | A | G | 0.158076 | 34.92330511 |
| Processed meat intake    id:ukb-b-6324        | rs6961970  | 461981 | -0.01401 | 0.002441 | 9.50E-09 | A | C | 0.244698 | 32.95106191 |
| Processed meat intake    id:ukb-b-6324        | rs4240672  | 461981 | 0.01712  | 0.002094 | 3.00E-16 | A | G | 0.494014 | 66.83584837 |
| Processed meat intake    id:ukb-b-6324        | rs6484504  | 461981 | 0.015473 | 0.002348 | 4.40E-11 | C | T | 0.72462  | 43.42888028 |
| Processed meat intake    id:ukb-b-6324        | rs11032380 | 461981 | -0.01332 | 0.002223 | 2.10E-09 | T | A | 0.333352 | 35.92015049 |
| Processed meat intake    id:ukb-b-6324        | rs4778053  | 461981 | 0.016467 | 0.002899 | 1.30E-08 | G | C | 0.843808 | 32.2701224  |
| Processed meat intake    id:ukb-b-6324        | rs34241936 | 461981 | 0.032837 | 0.005753 | 1.10E-08 | G | A | 0.037369 | 32.57424823 |
| Processed meat intake    id:ukb-b-6324        | rs8096167  | 461981 | -0.01459 | 0.002671 | 4.70E-08 | C | T | 0.1926   | 29.85623806 |
| Processed meat intake    id:ukb-b-6324        | rs838133   | 461981 | 0.019014 | 0.002166 | 1.60E-18 | G | A | 0.549369 | 77.08978661 |
| Processed meat intake    id:ukb-b-6324        | rs6010651  | 461981 | -0.01241 | 0.002168 | 1.10E-08 | C | A | 0.379439 | 32.74568067 |
| Processed meat intake    id:ukb-b-6324        | rs203319   | 461981 | -0.01642 | 0.002602 | 2.80E-10 | T | C | 0.204594 | 39.84163356 |
| Salad / raw vegetable intake    id:ukb-b-1996 | rs9427220  | 435435 | -0.00801 | 0.001442 | 2.80E-08 | T | A | 0.554661 | 30.83517474 |
| Salad / raw vegetable intake    id:ukb-b-1996 | rs4083969  | 435435 | 0.017133 | 0.003115 | 3.80E-08 | G | C | 0.057217 | 30.24846399 |
| Salad / raw vegetable intake    id:ukb-b-1996 | rs7619139  | 435435 | 0.012477 | 0.001451 | 8.00E-18 | A | T | 0.589193 | 73.94937827 |
| Salad / raw vegetable intake    id:ukb-b-1996 | rs13102393 | 435435 | 0.007979 | 0.00143  | 2.40E-08 | G | C | 0.499077 | 31.12322902 |
| Salad / raw vegetable intake    id:ukb-b-1996 | rs17460017 | 435435 | 0.011174 | 0.001813 | 7.20E-10 | T | A | 0.190124 | 37.97263927 |
| Salad / raw vegetable intake    id:ukb-b-1996 | rs2194027  | 435435 | -0.00861 | 0.001436 | 2.00E-09 | A | T | 0.484664 | 36.95028361 |
| Salad / raw vegetable intake    id:ukb-b-1996 | rs3129962  | 435435 | -0.0133  | 0.002123 | 3.70E-10 | A | G | 0.129168 | 39.28062216 |
| Salad / raw vegetable intake    id:ukb-b-1996 | rs12203592 | 435435 | -0.01029 | 0.001694 | 1.30E-09 | T | C | 0.219338 | 36.86605923 |
| Salad / raw vegetable intake    id:ukb-b-1996 | rs3095337  | 435435 | -0.01262 | 0.001766 | 9.00E-13 | C | G | 0.203909 | 51.05981399 |
| Salad / raw vegetable intake    id:ukb-b-1996 | rs75248709 | 435435 | -0.01973 | 0.003528 | 2.20E-08 | T | C | 0.045947 | 31.29195574 |
| Salad / raw vegetable intake    id:ukb-b-1996 | rs57221424 | 435435 | 0.008941 | 0.001533 | 5.50E-09 | G | C | 0.321733 | 34.00446016 |
| Salad / raw vegetable intake    id:ukb-b-1996 | rs62461186 | 435435 | -0.01134 | 0.001857 | 1.00E-09 | C | A | 0.179827 | 37.30299064 |
| Salad / raw vegetable intake    id:ukb-b-1996 | rs790561   | 435435 | 0.012474 | 0.001562 | 1.40E-15 | G | A | 0.704134 | 63.77566285 |
| Salad / raw vegetable intake    id:ukb-b-1996 | rs7821179  | 435435 | -0.01082 | 0.001976 | 4.40E-08 | C | G | 0.846577 | 29.96117219 |
| Salad / raw vegetable intake    id:ukb-b-1996 | rs10819082 | 435435 | -0.00916 | 0.001513 | 1.40E-09 | A | G | 0.66734  | 36.67096236 |
| Salad / raw vegetable intake    id:ukb-b-1996 | rs6482190  | 435435 | 0.011272 | 0.00159  | 1.40E-12 | G | A | 0.719408 | 50.2415982  |
| Salad / raw vegetable intake    id:ukb-b-1996 | rs1890012  | 435435 | -0.01043 | 0.001808 | 8.10E-09 | G | T | 0.19473  | 33.25452525 |
| Salad / raw vegetable intake    id:ukb-b-1996 | rs12908495 | 435435 | -0.00935 | 0.001666 | 2.00E-08 | A | C | 0.242533 | 31.30750448 |
| Salad / raw vegetable intake    id:ukb-b-1996 | rs1052352  | 435435 | 0.008164 | 0.001426 | 1.00E-08 | T | C | 0.52355  | 32.79691991 |
| Salad / raw vegetable intake    id:ukb-b-1996 | rs34186148 | 435435 | -0.00805 | 0.001475 | 4.80E-08 | C | G | 0.370054 | 29.80024351 |
| Salad / raw vegetable intake    id:ukb-b-1996 | rs4291983  | 435435 | -0.0084  | 0.001425 | 3.70E-09 | A | C | 0.517576 | 34.75594909 |
| Salad / raw vegetable intake    id:ukb-b-1996 | rs8130508  | 435435 | 0.00874  | 0.001578 | 3.00E-08 | A | G | 0.289686 | 30.68069068 |
| Salt added to food    id:ukb-b-8121           | rs12563932 | 462630 | -0.02849 | 0.00521  | 4.50E-08 | C | A | 0.029478 | 29.90918161 |
| Salt added to food    id:ukb-b-8121           | rs10752999 | 462630 | 0.012762 | 0.001927 | 3.50E-11 | C | A | 0.702035 | 43.85373858 |
| Salt added to food    id:ukb-b-8121           | rs12094804 | 462630 | 0.020506 | 0.003656 | 2.00E-08 | G | A | 0.061754 | 31.46264204 |
| Salt added to food    id:ukb-b-8121           | rs11210985 | 462630 | -0.01566 | 0.001818 | 7.20E-18 | A | G | 0.3791   | 74.16054984 |
| Salt added to food    id:ukb-b-8121           | rs6695915  | 462630 | -0.01663 | 0.002998 | 2.90E-08 | G | A | 0.095551 | 30.75941412 |
| Salt added to food    id:ukb-b-8121           | rs1008078  | 462630 | 0.01166  | 0.001806 | 1.10E-10 | T | C | 0.395512 | 41.65850007 |
| Salt added to food    id:ukb-b-8121           | rs528301   | 462630 | 0.015261 | 0.00177  | 6.60E-18 | A | G | 0.554846 | 74.3317749  |
| Salt added to food    id:ukb-b-8121           | rs976179   | 462630 | 0.010067 | 0.001765 | 1.20E-08 | T | A | 0.485324 | 32.53725369 |
| Salt added to food    id:ukb-b-8121           | rs55897719 | 462630 | 0.013502 | 0.001896 | 1.10E-12 | A | C | 0.316817 | 50.71377907 |
| Salt added to food    id:ukb-b-8121           | rs7591518  | 462630 | -0.02077 | 0.00193  | 5.10E-27 | C | T | 0.298453 | 115.8653479 |
| Salt added to food    id:ukb-b-8121           | rs11126666 | 462630 | -0.01199 | 0.002019 | 2.90E-09 | A | G | 0.255562 | 35.25162725 |
| Salt added to food    id:ukb-b-8121           | rs2263636  | 462630 | 0.011256 | 0.001965 | 1.00E-08 | C | A | 0.719001 | 32.82698401 |
| Salt added to food    id:ukb-b-8121           | rs13400612 | 462630 | 0.020285 | 0.002043 | 3.00E-23 | G | C | 0.246906 | 98.62800776 |
| Salt added to food    id:ukb-b-8121           | rs12988960 | 462630 | 0.014981 | 0.001896 | 2.80E-15 | C | G | 0.315972 | 62.40138572 |
| Salt added to food    id:ukb-b-8121           | rs264932   | 462630 | -0.01042 | 0.001802 | 7.30E-09 | G | A | 0.605889 | 33.44367058 |
| Salt added to food    id:ukb-b-8121           | rs7581335  | 462630 | 0.014931 | 0.002533 | 3.80E-09 | T | A | 0.140518 | 34.74126996 |
| Salt added to food    id:ukb-b-8121           | rs17805497 | 462630 | 0.012482 | 0.00185  | 1.50E-11 | C | T | 0.345071 | 45.51036228 |
| Salt added to food    id:ukb-b-8121           | rs13084934 | 462630 | -0.00968 | 0.001767 | 4.40E-08 | T | A | 0.494691 | 29.969865   |
| Salt added to food    id:ukb-b-8121           | rs6776248  | 462630 | 0.011341 | 0.001998 | 1.40E-08 | C | T | 0.26336  | 32.21977471 |
| Salt added to food    id:ukb-b-8121           | rs6780346  | 462630 | -0.01684 | 0.001817 | 1.90E-20 | T | C | 0.620997 | 85.84503183 |
| Salt added to food    id:ukb-b-8121           | rs400750   | 462630 | 0.016712 | 0.001815 | 3.30E-20 | G | T | 0.616712 | 84.8128261  |
| Salt added to food    id:ukb-b-8121           | rs2736748  | 462630 | 0.028012 | 0.00216  | 1.80E-38 | G | A | 0.789193 | 168.2486097 |
| Salt added to food    id:ukb-b-8121           | rs73040343 | 462630 | -0.01035 | 0.001814 | 1.20E-08 | G | A | 0.381434 | 32.5544108  |
| Salt added to food    id:ukb-b-8121           | rs736935   | 462630 | 0.015688 | 0.001879 | 6.80E-17 | T | C | 0.336413 | 69.72802014 |
| Salt added to food    id:ukb-b-8121           | rs9843358  | 462630 | 0.018953 | 0.002344 | 6.20E-16 | T | C | 0.171903 | 65.36627414 |
| Salt added to food    id:ukb-b-8121           | rs9835772  | 462630 | 0.011451 | 0.002052 | 2.40E-08 | T | A | 0.243664 | 31.13738978 |
| Salt added to food    id:ukb-b-8121           | rs11130206 | 462630 | -0.01203 | 0.001776 | 1.20E-11 | G | C | 0.432321 | 45.9249289  |
| Salt added to food    id:ukb-b-8121           | rs6804929  | 462630 | 0.016706 | 0.002889 | 7.40E-09 | A | G | 0.105016 | 33.43330753 |
| Salt added to food    id:ukb-b-8121           | rs6443950  | 462630 | -0.01421 | 0.001831 | 8.50E-15 | T | A | 0.631504 | 60.21326612 |
| Salt added to food    id:ukb-b-8121           | rs7673170  | 462630 | -0.0126  | 0.001801 | 2.70E-12 | A | G | 0.395273 | 48.90204364 |

|                                     |             |        |           |          |          |   |   |          |             |
|-------------------------------------|-------------|--------|-----------|----------|----------|---|---|----------|-------------|
| Salt added to food    id:ukb-b-8121 | rs12501838  | 462630 | 0.014667  | 0.002082 | 1.80E-12 | T | A | 0.23366  | 49.64778409 |
| Salt added to food    id:ukb-b-8121 | rs7670308   | 462630 | -0.01164  | 0.001801 | 1.00E-10 | A | G | 0.409195 | 41.75946011 |
| Salt added to food    id:ukb-b-8121 | rs4860797   | 462630 | 0.011667  | 0.001808 | 1.10E-10 | A | G | 0.601276 | 41.65808626 |
| Salt added to food    id:ukb-b-8121 | rs34906832  | 462630 | 0.015098  | 0.00253  | 2.40E-09 | G | A | 0.140896 | 35.60826027 |
| Salt added to food    id:ukb-b-8121 | rs526210    | 462630 | 0.010095  | 0.001819 | 2.80E-08 | A | G | 0.542868 | 30.8095771  |
| Salt added to food    id:ukb-b-8121 | rs3890316   | 462630 | -0.01133  | 0.002042 | 2.80E-08 | A | G | 0.249954 | 30.81064487 |
| Salt added to food    id:ukb-b-8121 | rs13131880  | 462630 | -0.01262  | 0.002128 | 3.00E-09 | C | T | 0.220413 | 35.18221896 |
| Salt added to food    id:ukb-b-8121 | rs12658060  | 462630 | -0.02741  | 0.002118 | 2.50E-38 | C | T | 0.222971 | 167.5963664 |
| Salt added to food    id:ukb-b-8121 | rs868720    | 462630 | 0.015994  | 0.001925 | 9.60E-17 | C | G | 0.305451 | 69.05358891 |
| Salt added to food    id:ukb-b-8121 | rs33137     | 462630 | -0.01208  | 0.001773 | 9.40E-12 | T | C | 0.493871 | 46.44332372 |
| Salt added to food    id:ukb-b-8121 | rs1823011   | 462630 | -0.01023  | 0.001861 | 3.90E-08 | G | A | 0.659939 | 30.18540582 |
| Salt added to food    id:ukb-b-8121 | rs4912891   | 462630 | 0.010655  | 0.001923 | 3.00E-08 | C | T | 0.691882 | 30.70249555 |
| Salt added to food    id:ukb-b-8121 | rs4235642   | 462630 | 0.012294  | 0.001816 | 1.30E-11 | G | A | 0.379691 | 45.80406063 |
| Salt added to food    id:ukb-b-8121 | rs6887291   | 462630 | 0.012676  | 0.001836 | 5.10E-12 | G | T | 0.636126 | 47.63945323 |
| Salt added to food    id:ukb-b-8121 | rs2339234   | 462630 | -0.01764  | 0.0019   | 1.60E-20 | A | G | 0.683186 | 86.20494285 |
| Salt added to food    id:ukb-b-8121 | rs9375448   | 462630 | -0.01168  | 0.001762 | 3.40E-11 | T | A | 0.492981 | 43.95057289 |
| Salt added to food    id:ukb-b-8121 | rs35099536  | 462630 | 0.025959  | 0.003207 | 5.80E-16 | C | A | 0.08461  | 65.49908856 |
| Salt added to food    id:ukb-b-8121 | rs4236065   | 462630 | -0.01117  | 0.002031 | 3.80E-08 | C | T | 0.255885 | 30.26706717 |
| Salt added to food    id:ukb-b-8121 | rs28366169  | 462630 | -0.02085  | 0.003299 | 2.60E-10 | A | G | 0.077319 | 39.92541372 |
| Salt added to food    id:ukb-b-8121 | rs2506738   | 462630 | -0.0151   | 0.001801 | 5.00E-17 | G | A | 0.401141 | 70.33413718 |
| Salt added to food    id:ukb-b-8121 | rs9278020   | 462630 | 0.023222  | 0.002862 | 4.80E-16 | A | G | 0.10619  | 65.85915985 |
| Salt added to food    id:ukb-b-8121 | rs2463710   | 462630 | 0.011952  | 0.002191 | 4.90E-08 | A | T | 0.753885 | 29.75383129 |
| Salt added to food    id:ukb-b-8121 | rs1726866   | 462630 | 0.026544  | 0.00177  | 7.70E-51 | A | G | 0.552077 | 224.8983154 |
| Salt added to food    id:ukb-b-8121 | rs11761254  | 462630 | -0.01768  | 0.002546 | 3.80E-12 | T | C | 0.136978 | 48.2298397  |
| Salt added to food    id:ukb-b-8121 | rs2457427   | 462630 | -0.01658  | 0.002569 | 1.10E-10 | C | T | 0.863856 | 41.64764359 |
| Salt added to food    id:ukb-b-8121 | rs6987313   | 462630 | 0.009907  | 0.001766 | 2.00E-08 | C | T | 0.520156 | 31.47780687 |
| Salt added to food    id:ukb-b-8121 | rs4739105   | 462630 | 0.015465  | 0.00218  | 1.30E-12 | C | T | 0.787781 | 50.3180536  |
| Salt added to food    id:ukb-b-8121 | rs10971930  | 462630 | 0.015501  | 0.002644 | 4.50E-09 | C | T | 0.127418 | 38.28315493 |
| Salt added to food    id:ukb-b-8121 | rs586716    | 462630 | 0.014367  | 0.001793 | 1.10E-15 | A | G | 0.414681 | 64.18088129 |
| Salt added to food    id:ukb-b-8121 | rs7465705   | 462630 | -0.01185  | 0.001816 | 6.80E-11 | A | G | 0.384538 | 42.56725616 |
| Salt added to food    id:ukb-b-8121 | rs7021360   | 462630 | -0.01012  | 0.00181  | 2.30E-08 | A | C | 0.388225 | 31.25260398 |
| Salt added to food    id:ukb-b-8121 | rs10128297  | 462630 | -0.01055  | 0.0018   | 4.50E-09 | T | C | 0.402787 | 34.38236171 |
| Salt added to food    id:ukb-b-8121 | rs10883796  | 462630 | 0.011441  | 0.001934 | 3.30E-09 | A | G | 0.294358 | 34.98459757 |
| Salt added to food    id:ukb-b-8121 | rs4595499   | 462630 | -0.01728  | 0.001808 | 1.20E-21 | T | C | 0.391888 | 91.34708069 |
| Salt added to food    id:ukb-b-8121 | rs4948275   | 462630 | -0.012715 | 0.001773 | 7.40E-13 | T | C | 0.481851 | 51.44692403 |
| Salt added to food    id:ukb-b-8121 | rs10736951  | 462630 | -0.01136  | 0.001843 | 7.00E-10 | C | G | 0.635537 | 38.00926553 |
| Salt added to food    id:ukb-b-8121 | rs9667150   | 462630 | 0.012589  | 0.001781 | 1.50E-12 | A | G | 0.559523 | 49.98615471 |
| Salt added to food    id:ukb-b-8121 | rs329670    | 462630 | -0.01529  | 0.002633 | 6.30E-09 | C | T | 0.870289 | 33.73501715 |
| Salt added to food    id:ukb-b-8121 | rs35271178  | 462630 | 0.010244  | 0.001791 | 1.10E-08 | T | C | 0.588507 | 32.71763603 |
| Salt added to food    id:ukb-b-8121 | rs7927679   | 462630 | 0.014954  | 0.001764 | 2.30E-17 | T | C | 0.504024 | 71.86569511 |
| Salt added to food    id:ukb-b-8121 | rs12789951  | 462630 | -0.01172  | 0.001797 | 7.00E-11 | T | C | 0.411036 | 42.52020593 |
| Salt added to food    id:ukb-b-8121 | rs7110845   | 462630 | -0.01154  | 0.001786 | 1.10E-10 | G | A | 0.579174 | 41.71927452 |
| Salt added to food    id:ukb-b-8121 | rs35702851  | 462630 | 0.012196  | 0.002191 | 2.60E-08 | C | G | 0.204203 | 30.99853126 |
| Salt added to food    id:ukb-b-8121 | rs11022746  | 462630 | 0.011827  | 0.001913 | 6.30E-10 | G | T | 0.681941 | 38.21516977 |
| Salt added to food    id:ukb-b-8121 | rs99780     | 462630 | 0.010907  | 0.001848 | 3.60E-09 | T | C | 0.350239 | 34.85112376 |
| Salt added to food    id:ukb-b-8121 | rs667128    | 462630 | 0.015426  | 0.002652 | 6.00E-09 | T | C | 0.126584 | 33.82515219 |
| Salt added to food    id:ukb-b-8121 | rs1895951   | 462630 | -0.01169  | 0.002142 | 4.80E-08 | C | T | 0.220794 | 29.78591831 |
| Salt added to food    id:ukb-b-8121 | rs324018    | 462630 | 0.01001   | 0.001812 | 3.30E-08 | G | T | 0.613528 | 30.53313421 |
| Salt added to food    id:ukb-b-8121 | rs12579997  | 462630 | 0.016031  | 0.002348 | 8.60E-12 | C | G | 0.170455 | 46.62146884 |
| Salt added to food    id:ukb-b-8121 | rs1045411   | 462630 | -0.01507  | 0.001993 | 4.00E-14 | T | C | 0.268305 | 57.17062891 |
| Salt added to food    id:ukb-b-8121 | rs9569747   | 462630 | -0.01256  | 0.001936 | 8.60E-11 | G | T | 0.298073 | 42.10585185 |
| Salt added to food    id:ukb-b-8121 | rs9317406   | 462630 | -0.0107   | 0.001824 | 4.40E-09 | T | C | 0.376115 | 34.42832064 |
| Salt added to food    id:ukb-b-8121 | rs7982263   | 462630 | 0.010608  | 0.001788 | 2.90E-09 | C | T | 0.581981 | 35.22148582 |
| Salt added to food    id:ukb-b-8121 | rs10140751  | 462630 | -0.01127  | 0.002047 | 3.60E-08 | T | G | 0.245951 | 32.47374832 |
| Salt added to food    id:ukb-b-8121 | rs4981196   | 462630 | -0.01146  | 0.001822 | 3.30E-10 | C | A | 0.635898 | 39.51373198 |
| Salt added to food    id:ukb-b-8121 | rs8022455   | 462630 | -0.01114  | 0.001774 | 3.40E-10 | C | T | 0.54702  | 39.44578346 |
| Salt added to food    id:ukb-b-8121 | rs2693687   | 462630 | 0.011628  | 0.00182  | 1.70E-10 | T | C | 0.393736 | 40.79768528 |
| Salt added to food    id:ukb-b-8121 | rs961044    | 462630 | -0.01401  | 0.002527 | 3.00E-08 | T | C | 0.857621 | 30.72064854 |
| Salt added to food    id:ukb-b-8121 | rs2521501   | 462630 | -0.0114   | 0.0019   | 2.00E-09 | T | A | 0.322086 | 35.95619075 |
| Salt added to food    id:ukb-b-8121 | rs8040685   | 462630 | -0.01541  | 0.002758 | 2.30E-08 | T | C | 0.884465 | 31.20392241 |
| Salt added to food    id:ukb-b-8121 | rs491907    | 462630 | 0.010986  | 0.001763 | 4.60E-10 | G | A | 0.511555 | 38.83452439 |
| Salt added to food    id:ukb-b-8121 | rs6416794   | 462630 | -0.012    | 0.0022   | 4.90E-08 | C | T | 0.798724 | 29.74170034 |
| Salt added to food    id:ukb-b-8121 | rs1728779   | 462630 | 0.009871  | 0.001789 | 3.50E-08 | G | A | 0.436092 | 30.43583114 |
| Salt added to food    id:ukb-b-8121 | rs11075194  | 462630 | -0.00982  | 0.001787 | 4.00E-08 | G | A | 0.425797 | 30.16236733 |
| Salt added to food    id:ukb-b-8121 | rs2547040   | 462630 | -0.01271  | 0.002229 | 1.20E-08 | C | G | 0.805074 | 32.49178461 |
| Salt added to food    id:ukb-b-8121 | rs72807804  | 462630 | 0.012064  | 0.002139 | 1.70E-08 | T | C | 0.218782 | 31.81063573 |
| Salt added to food    id:ukb-b-8121 | rs35142265  | 462630 | 0.015013  | 0.002136 | 2.10E-12 | G | A | 0.218202 | 49.38614983 |
| Salt added to food    id:ukb-b-8121 | rs11082431  | 462630 | 0.010565  | 0.001921 | 3.80E-08 | T | C | 0.301904 | 30.25466782 |
| Salt added to food    id:ukb-b-8121 | rs62098445  | 462630 | -0.01586  | 0.001911 | 1.00E-16 | A | C | 0.318657 | 68.87986577 |
| Salt added to food    id:ukb-b-8121 | rs8097544   | 462630 | 0.01403   | 0.002513 | 2.40E-08 | G | A | 0.145366 | 31.17563684 |
| Salt added to food    id:ukb-b-8121 | rs4799949   | 462630 | -0.01098  | 0.001872 | 4.50E-09 | T | C | 0.667226 | 34.39990489 |
| Salt added to food    id:ukb-b-8121 | rs2852348   | 462630 | -0.01312  | 0.001777 | 1.60E-13 | G | A | 0.458696 | 54.4601483  |
| Salt added to food    id:ukb-b-8121 | rs429358    | 462630 | -0.0154   | 0.002442 | 2.90E-10 | C | T | 0.154168 | 39.75827215 |
| Salt added to food    id:ukb-b-8121 | rs2835623   | 462630 | 0.022677  | 0.004144 | 4.40E-08 | T | C | 0.04766  | 29.95112178 |
| Salt added to food    id:ukb-b-8121 | rs9611875   | 462630 | 0.066201  | 0.004519 | 1.30E-48 | G | A | 0.039616 | 214.635715  |
| Salt added to food    id:ukb-b-8121 | rs2899345   | 462630 | 0.009887  | 0.001773 | 2.50E-08 | C | T | 0.504298 | 31.09436749 |
| Water intake    id:ukb-b-14898      | rs34967813  | 427588 | -0.01206  | 0.001956 | 7.10E-10 | G | A | 0.311025 | 38.00302747 |
| Water intake    id:ukb-b-14898      | rs2305813   | 427588 | -0.01912  | 0.002769 | 5.00E-12 | C | G | 0.123354 | 47.66951406 |
| Water intake    id:ukb-b-14898      | rs782221    | 427588 | -0.01271  | 0.002262 | 1.90E-08 | T | C | 0.200429 | 31.58096512 |
| Water intake    id:ukb-b-14898      | rs182050989 | 427588 | 0.030528  | 0.005474 | 2.40E-08 | T | C | 0.02835  | 31.10316429 |
| Water intake    id:ukb-b-14898      | rs11890994  | 427588 | 0.011095  | 0.001879 | 3.60E-09 | T | A | 0.371683 | 34.85067295 |
| Water intake    id:ukb-b-14898      | rs2198234   | 427588 | 0.01167   | 0.001816 | 1.30E-10 | T | G | 0.528757 | 41.30033818 |
| Water intake    id:ukb-b-14898      | rs11125629  | 427588 | 0.010867  | 0.001823 | 2.50E-09 | G | A | 0.546761 | 35.53872078 |
| Water intake    id:ukb-b-14898      | rs9830293   | 427588 | 0.019082  | 0.003475 | 4.00E-08 | G | A | 0.073462 | 30.15829689 |
| Water intake    id:ukb-b-14898      | rs7626335   | 427588 | 0.010769  | 0.001933 | 2.50E-08 | C | A | 0.668446 | 31.04722459 |
| Water intake    id:ukb-b-14898      | rs6844845   | 427588 | -0.02151  | 0.003894 | 3.30E-08 | G | A | 0.057487 | 30.5230641  |
| Water intake    id:ukb-b-14898      | rs6835325   | 427588 | -0.01187  | 0.001978 | 2.00E-09 | G | T | 0.30096  | 35.97622437 |

|                                         |             |        |          |          |          |   |   |          |             |
|-----------------------------------------|-------------|--------|----------|----------|----------|---|---|----------|-------------|
| Water intake    id:ukb-b-14898          | rs67174962  | 427588 | -0.01226 | 0.002157 | 1.30E-08 | A | G | 0.232324 | 32.34092507 |
| Water intake    id:ukb-b-14898          | rs6905712   | 427588 | 0.011088 | 0.001928 | 8.90E-09 | A | T | 0.664977 | 33.06715227 |
| Water intake    id:ukb-b-14898          | rs2274156   | 427588 | -0.01149 | 0.002071 | 2.90E-08 | T | C | 0.258771 | 30.76619403 |
| Water intake    id:ukb-b-14898          | rs6957745   | 427588 | -0.01529 | 0.002262 | 1.40E-11 | C | T | 0.202686 | 45.69599112 |
| Water intake    id:ukb-b-14898          | rs3808058   | 427588 | 0.018332 | 0.002816 | 7.50E-11 | T | C | 0.117807 | 42.37345884 |
| Water intake    id:ukb-b-14898          | rs4410790   | 427588 | -0.03087 | 0.001877 | 8.60E-61 | C | T | 0.629877 | 270.5421948 |
| Water intake    id:ukb-b-14898          | rs10954732  | 427588 | 0.01062  | 0.001928 | 3.60E-08 | A | G | 0.671297 | 30.33775273 |
| Water intake    id:ukb-b-14898          | rs2656285   | 427588 | 0.012242 | 0.002007 | 1.10E-09 | C | T | 0.709918 | 37.19674487 |
| Water intake    id:ukb-b-14898          | rs9414686   | 427588 | 0.01476  | 0.002406 | 8.60E-10 | T | C | 0.178007 | 37.62204636 |
| Water intake    id:ukb-b-14898          | rs10758255  | 427588 | -0.01079 | 0.00186  | 6.70E-09 | A | T | 0.609855 | 33.61739575 |
| Water intake    id:ukb-b-14898          | rs11140831  | 427588 | -0.01238 | 0.001836 | 1.50E-11 | G | A | 0.514151 | 45.47717791 |
| Water intake    id:ukb-b-14898          | rs35028442  | 427588 | 0.016424 | 0.002688 | 9.90E-10 | C | G | 0.137272 | 37.33602984 |
| Water intake    id:ukb-b-14898          | rs11012726  | 427588 | -0.01224 | 0.001979 | 6.20E-10 | C | T | 0.307334 | 38.24414741 |
| Water intake    id:ukb-b-14898          | rs3763874   | 427588 | 0.01633  | 0.00184  | 6.90E-19 | A | G | 0.41763  | 78.79441688 |
| Water intake    id:ukb-b-14898          | rs7124005   | 427588 | 0.010367 | 0.00186  | 2.50E-08 | T | C | 0.415348 | 31.04995536 |
| Water intake    id:ukb-b-14898          | rs2229357   | 427588 | -0.01221 | 0.002115 | 7.90E-09 | A | G | 0.240393 | 33.30314151 |
| Water intake    id:ukb-b-14898          | rs34940743  | 427588 | -0.01039 | 0.001898 | 4.40E-08 | G | A | 0.346783 | 29.96484877 |
| Water intake    id:ukb-b-14898          | rs146394874 | 427588 | 0.026142 | 0.00422  | 5.80E-10 | A | C | 0.049323 | 38.37927245 |
| Water intake    id:ukb-b-14898          | rs1963510   | 427588 | 0.013307 | 0.00182  | 2.60E-13 | G | A | 0.458107 | 53.48637183 |
| Water intake    id:ukb-b-14898          | rs4603502   | 427588 | -0.01307 | 0.001993 | 5.40E-11 | C | T | 0.292378 | 43.0259953  |
| Water intake    id:ukb-b-14898          | rs2472297   | 427588 | -0.03342 | 0.002057 | 2.40E-59 | T | C | 0.26061  | 263.9073012 |
| Water intake    id:ukb-b-14898          | rs8054636   | 427588 | -0.01033 | 0.001851 | 2.40E-08 | C | T | 0.537476 | 31.14808957 |
| Water intake    id:ukb-b-14898          | rs2289292   | 427588 | -0.01277 | 0.001927 | 3.40E-11 | T | C | 0.334337 | 43.90867628 |
| Water intake    id:ukb-b-14898          | rs1421085   | 427588 | 0.01201  | 0.001846 | 7.70E-11 | C | T | 0.403711 | 42.33483863 |
| Water intake    id:ukb-b-14898          | rs2435200   | 427588 | 0.011214 | 0.001838 | 1.10E-09 | A | G | 0.412694 | 37.20774372 |
| Water intake    id:ukb-b-14898          | rs4239466   | 427588 | 0.010643 | 0.001896 | 2.00E-08 | C | A | 0.391897 | 31.49257013 |
| Water intake    id:ukb-b-14898          | rs9957088   | 427588 | -0.01183 | 0.002087 | 1.40E-08 | T | C | 0.253192 | 32.12392725 |
| Water intake    id:ukb-b-14898          | rs429358    | 427588 | 0.016681 | 0.002509 | 3.00E-11 | C | T | 0.154368 | 44.2019162  |
| Water intake    id:ukb-b-14898          | rs56100328  | 427588 | -0.01755 | 0.003217 | 4.80E-08 | G | A | 0.090196 | 29.78130102 |
| Water intake    id:ukb-b-14898          | rs3746410   | 427588 | 0.016839 | 0.00225  | 7.30E-14 | G | A | 0.20396  | 55.99847645 |
| Hot drink temperature    id:ukb-b-14203 | rs79564740  | 457873 | -0.01925 | 0.003453 | 2.50E-08 | C | T | 0.030417 | 31.08358054 |
| Hot drink temperature    id:ukb-b-14203 | rs2786529   | 457873 | -0.00831 | 0.001456 | 1.20E-08 | G | C | 0.209494 | 32.55132125 |
| Hot drink temperature    id:ukb-b-14203 | rs12132579  | 457873 | 0.007053 | 0.001238 | 1.20E-08 | T | C | 0.357498 | 32.43585083 |
| Hot drink temperature    id:ukb-b-14203 | rs10927006  | 457873 | -0.01374 | 0.001693 | 4.80E-16 | C | T | 0.143611 | 65.88046637 |
| Hot drink temperature    id:ukb-b-14203 | rs12038134  | 457873 | 0.006537 | 0.001187 | 3.60E-08 | A | T | 0.508213 | 30.35154638 |
| Hot drink temperature    id:ukb-b-14203 | rs1001880   | 457873 | 0.007384 | 0.001284 | 8.90E-09 | C | T | 0.313764 | 33.06738103 |
| Hot drink temperature    id:ukb-b-14203 | rs12622811  | 457873 | -0.01026 | 0.001302 | 3.10E-15 | T | C | 0.298571 | 62.17992726 |
| Hot drink temperature    id:ukb-b-14203 | rs74384251  | 457873 | 0.009525 | 0.001727 | 3.50E-08 | T | C | 0.136886 | 30.43161005 |
| Hot drink temperature    id:ukb-b-14203 | rs62134736  | 457873 | 0.007577 | 0.001351 | 2.00E-08 | A | G | 0.2591   | 31.45238438 |
| Hot drink temperature    id:ukb-b-14203 | rs17409597  | 457873 | -0.00699 | 0.001194 | 4.90E-09 | C | T | 0.491526 | 34.2191888  |
| Hot drink temperature    id:ukb-b-14203 | rs1260326   | 457873 | -0.00919 | 0.00121  | 3.20E-14 | C | T | 0.604332 | 57.59371483 |
| Hot drink temperature    id:ukb-b-14203 | rs1568452   | 457873 | -0.01205 | 0.001222 | 5.90E-23 | T | C | 0.382005 | 97.32815252 |
| Hot drink temperature    id:ukb-b-14203 | rs17024335  | 457873 | -0.00829 | 0.001431 | 6.90E-09 | C | T | 0.223585 | 33.5667636  |
| Hot drink temperature    id:ukb-b-14203 | rs6736362   | 457873 | -0.00665 | 0.001195 | 2.70E-08 | T | C | 0.560656 | 30.93425193 |
| Hot drink temperature    id:ukb-b-14203 | rs1997468   | 457873 | 0.010862 | 0.001194 | 9.40E-20 | T | C | 0.439876 | 82.7289413  |
| Hot drink temperature    id:ukb-b-14203 | rs34292254  | 457873 | 0.007443 | 0.001195 | 4.70E-10 | T | G | 0.552492 | 38.81751032 |
| Hot drink temperature    id:ukb-b-14203 | rs1144428   | 457873 | 0.012221 | 0.00146  | 5.80E-17 | A | G | 0.790277 | 70.02982548 |
| Hot drink temperature    id:ukb-b-14203 | rs9835772   | 457873 | -0.00808 | 0.001381 | 4.90E-09 | T | A | 0.243662 | 34.24505228 |
| Hot drink temperature    id:ukb-b-14203 | rs12695358  | 457873 | -0.00706 | 0.00121  | 5.40E-09 | T | G | 0.597342 | 34.04426384 |
| Hot drink temperature    id:ukb-b-14203 | rs888405    | 457873 | 0.009196 | 0.001468 | 3.80E-10 | G | A | 0.794793 | 39.22013877 |
| Hot drink temperature    id:ukb-b-14203 | rs17023019  | 457873 | 0.012121 | 0.001242 | 1.70E-22 | G | A | 0.647408 | 95.24613315 |
| Hot drink temperature    id:ukb-b-14203 | rs11710570  | 457873 | -0.00768 | 0.001192 | 1.20E-10 | C | T | 0.448108 | 41.53538335 |
| Hot drink temperature    id:ukb-b-14203 | rs1513475   | 457873 | -0.00891 | 0.001244 | 7.80E-13 | C | T | 0.34937  | 51.34250586 |
| Hot drink temperature    id:ukb-b-14203 | rs2255015   | 457873 | -0.00698 | 0.001192 | 4.70E-09 | A | G | 0.454555 | 34.29084504 |
| Hot drink temperature    id:ukb-b-14203 | rs2702576   | 457873 | 0.007416 | 0.001224 | 1.40E-09 | G | A | 0.621311 | 36.73459649 |
| Hot drink temperature    id:ukb-b-14203 | rs2952894   | 457873 | 0.0072   | 0.001258 | 1.00E-08 | C | T | 0.664339 | 32.76689754 |
| Hot drink temperature    id:ukb-b-14203 | rs6876382   | 457873 | -0.01514 | 0.002524 | 2.00E-09 | G | C | 0.05895  | 35.97775683 |
| Hot drink temperature    id:ukb-b-14203 | rs111251222 | 457873 | -0.00773 | 0.00136  | 1.30E-08 | A | G | 0.258804 | 32.340478   |
| Hot drink temperature    id:ukb-b-14203 | rs2728784   | 457873 | -0.01101 | 0.001463 | 5.30E-14 | G | A | 0.208554 | 56.63337995 |
| Hot drink temperature    id:ukb-b-14203 | rs6892119   | 457873 | -0.00807 | 0.00122  | 3.90E-11 | G | A | 0.574513 | 43.68683053 |
| Hot drink temperature    id:ukb-b-14203 | rs6469      | 457873 | 0.010933 | 0.001931 | 1.50E-08 | T | C | 0.127478 | 32.05461809 |
| Hot drink temperature    id:ukb-b-14203 | rs1326609   | 457873 | -0.00781 | 0.001228 | 2.10E-10 | A | G | 0.371579 | 40.3905707  |
| Hot drink temperature    id:ukb-b-14203 | rs12664031  | 457873 | -0.01045 | 0.001376 | 3.00E-14 | A | C | 0.289569 | 57.71417917 |
| Hot drink temperature    id:ukb-b-14203 | rs3132487   | 457873 | -0.00965 | 0.00128  | 4.80E-14 | T | G | 0.345911 | 56.79464766 |
| Hot drink temperature    id:ukb-b-14203 | rs9372734   | 457873 | -0.00802 | 0.001188 | 1.40E-11 | T | C | 0.482495 | 45.60284033 |
| Hot drink temperature    id:ukb-b-14203 | rs62403110  | 457873 | -0.00743 | 0.00129  | 8.40E-09 | A | G | 0.302512 | 33.18868793 |
| Hot drink temperature    id:ukb-b-14203 | rs3117103   | 457873 | -0.01526 | 0.001707 | 4.00E-19 | T | A | 0.139554 | 79.89262948 |
| Hot drink temperature    id:ukb-b-14203 | rs58391518  | 457873 | -0.00737 | 0.001307 | 1.70E-08 | C | T | 0.291369 | 31.79826863 |
| Hot drink temperature    id:ukb-b-14203 | rs4410790   | 457873 | -0.01096 | 0.001229 | 4.80E-19 | C | T | 0.630852 | 79.50706537 |
| Hot drink temperature    id:ukb-b-14203 | rs2113336   | 457873 | -0.00721 | 0.001192 | 1.40E-09 | A | C | 0.470426 | 36.60539892 |
| Hot drink temperature    id:ukb-b-14203 | rs35968894  | 457873 | -0.00722 | 0.001225 | 3.80E-09 | G | A | 0.377461 | 34.71953421 |
| Hot drink temperature    id:ukb-b-14203 | rs210600    | 457873 | 0.007675 | 0.001326 | 7.10E-09 | A | G | 0.27676  | 33.50258837 |
| Hot drink temperature    id:ukb-b-14203 | rs2360802   | 457873 | -0.00942 | 0.001423 | 3.60E-11 | T | A | 0.225125 | 43.8358507  |
| Hot drink temperature    id:ukb-b-14203 | rs62572325  | 457873 | 0.011211 | 0.001739 | 1.20E-10 | A | C | 0.13467  | 41.53914692 |
| Hot drink temperature    id:ukb-b-14203 | rs62580693  | 457873 | 0.008041 | 0.001367 | 4.10E-09 | C | G | 0.252484 | 34.58186543 |
| Hot drink temperature    id:ukb-b-14203 | rs1027583   | 457873 | -0.00766 | 0.001344 | 1.20E-08 | C | G | 0.272924 | 32.50465369 |
| Hot drink temperature    id:ukb-b-14203 | rs10822089  | 457873 | -0.00728 | 0.001188 | 8.90E-10 | G | A | 0.523143 | 37.55909285 |
| Hot drink temperature    id:ukb-b-14203 | rs10764990  | 457873 | 0.009482 | 0.001214 | 5.80E-15 | A | G | 0.607319 | 60.96180986 |
| Hot drink temperature    id:ukb-b-14203 | rs10829603  | 457873 | 0.007357 | 0.001195 | 7.50E-10 | G | T | 0.451828 | 37.87986576 |
| Hot drink temperature    id:ukb-b-14203 | rs17461712  | 457873 | 0.012089 | 0.001595 | 3.40E-14 | C | T | 0.167426 | 57.46297641 |
| Hot drink temperature    id:ukb-b-14203 | rs11570094  | 457873 | 0.007546 | 0.001302 | 6.80E-09 | A | C | 0.295801 | 33.59042568 |
| Hot drink temperature    id:ukb-b-14203 | rs4492837   | 457873 | -0.00679 | 0.001206 | 1.80E-08 | C | G | 0.586887 | 31.71251389 |
| Hot drink temperature    id:ukb-b-14203 | rs1447182   | 457873 | 0.009392 | 0.001451 | 9.50E-11 | C | T | 0.782248 | 41.91942528 |
| Hot drink temperature    id:ukb-b-14203 | rs61909866  | 457873 | -0.00734 | 0.001277 | 8.90E-09 | T | C | 0.316065 | 33.06403153 |
| Hot drink temperature    id:ukb-b-14203 | rs2712661   | 457873 | -0.00824 | 0.001409 | 5.10E-09 | A | G | 0.769898 | 34.16220827 |
| Hot drink temperature    id:ukb-b-14203 | rs10744560  | 457873 | -0.00689 | 0.001254 | 3.90E-08 | T | C | 0.340057 | 30.19418932 |
| Hot drink temperature    id:ukb-b-14203 | rs826848    | 457873 | -0.01478 | 0.002388 | 6.10E-10 | T | C | 0.933713 | 38.30242227 |

|                                            |             |        |          |          |           |   |   |          |              |
|--------------------------------------------|-------------|--------|----------|----------|-----------|---|---|----------|--------------|
| Hot drink temperature    id:ukb-b-14203    | rs4477562   | 457873 | -0.01047 | 0.001786 | 4.50E-09  | T | C | 0.1287   | 34.38656641  |
| Hot drink temperature    id:ukb-b-14203    | rs9570736   | 457873 | -0.00656 | 0.001187 | 3.30E-08  | G | A | 0.518982 | 30.49624368  |
| Hot drink temperature    id:ukb-b-14203    | rs34759521  | 457873 | -0.00826 | 0.001417 | 5.60E-09  | A | T | 0.227077 | 33.97207095  |
| Hot drink temperature    id:ukb-b-14203    | rs2472297   | 457873 | -0.01539 | 0.001345 | 2.60E-30  | T | C | 0.261771 | 130.9128068  |
| Hot drink temperature    id:ukb-b-14203    | rs34935263  | 457873 | -0.00682 | 0.00119  | 1.00E-08  | G | A | 0.533192 | 32.82318419  |
| Hot drink temperature    id:ukb-b-14203    | rs58726064  | 457873 | 0.006771 | 0.001196 | 1.50E-08  | G | C | 0.442086 | 32.06326818  |
| Hot drink temperature    id:ukb-b-14203    | rs55880962  | 457873 | 0.008487 | 0.001505 | 1.70E-08  | A | G | 0.192325 | 31.7875179   |
| Hot drink temperature    id:ukb-b-14203    | rs17513240  | 457873 | -0.01065 | 0.001569 | 1.20E-11  | T | A | 0.172466 | 46.04594926  |
| Hot drink temperature    id:ukb-b-14203    | rs4452038   | 457873 | -0.01118 | 0.001223 | 6.50E-20  | T | C | 0.389867 | 83.45611928  |
| Hot drink temperature    id:ukb-b-14203    | rs1132845   | 457873 | -0.00699 | 0.001213 | 8.20E-09  | T | C | 0.404377 | 33.23506008  |
| Hot drink temperature    id:ukb-b-14203    | rs1680349   | 457873 | -0.00673 | 0.001198 | 1.90E-08  | A | G | 0.563781 | 31.57143105  |
| Hot drink temperature    id:ukb-b-14203    | rs6045331   | 457873 | -0.00759 | 0.001227 | 6.10E-10  | G | C | 0.37918  | 38.28236343  |
| Hot drink temperature    id:ukb-b-14203    | rs2825972   | 457873 | 0.008751 | 0.001304 | 1.90E-11  | G | A | 0.292758 | 45.04134557  |
| Hot drink temperature    id:ukb-b-14203    | rs2032512   | 457873 | -0.00892 | 0.001215 | 2.10E-13  | C | A | 0.607796 | 53.89209135  |
| Tea intake    id:ukb-b-6066                | rs11587444  | 447485 | 0.014033 | 0.002171 | 1.00E-10  | G | A | 0.393464 | 41.78852554  |
| Tea intake    id:ukb-b-6066                | rs11164870  | 447485 | -0.01196 | 0.002182 | 4.20E-08  | G | C | 0.604574 | 30.03686088  |
| Tea intake    id:ukb-b-6066                | rs56188862  | 447485 | -0.01576 | 0.002175 | 4.30E-13  | C | T | 0.387454 | 52.49734455  |
| Tea intake    id:ukb-b-6066                | rs1156588   | 447485 | -0.01545 | 0.002603 | 2.90E-09  | G | A | 0.210071 | 35.24114916  |
| Tea intake    id:ukb-b-6066                | rs57462170  | 447485 | 0.019151 | 0.003406 | 1.90E-08  | A | G | 0.108773 | 31.62025072  |
| Tea intake    id:ukb-b-6066                | rs2117137   | 447485 | 0.012995 | 0.002156 | 1.70E-09  | G | A | 0.405148 | 36.33812848  |
| Tea intake    id:ukb-b-6066                | rs1481012   | 447485 | -0.02624 | 0.003356 | 5.30E-15  | G | A | 0.112209 | 61.14752739  |
| Tea intake    id:ukb-b-6066                | rs34619     | 447485 | 0.011712 | 0.002138 | 4.30E-08  | A | G | 0.430905 | 30.02117124  |
| Tea intake    id:ukb-b-6066                | rs72797284  | 447485 | -0.01711 | 0.002384 | 7.00E-13  | G | A | 0.270797 | 51.55815132  |
| Tea intake    id:ukb-b-6066                | rs7757102   | 447485 | -0.0118  | 0.002133 | 3.10E-08  | G | A | 0.555426 | 30.62394866  |
| Tea intake    id:ukb-b-6066                | rs2478875   | 447485 | 0.021894 | 0.002611 | 5.10E-17  | G | A | 0.208758 | 70.29944849  |
| Tea intake    id:ukb-b-6066                | rs149805207 | 447485 | -0.07193 | 0.012582 | 1.10E-08  | G | A | 0.008538 | 32.68471685  |
| Tea intake    id:ukb-b-6066                | rs4410790   | 447485 | 0.040551 | 0.002195 | 3.40E-76  | C | T | 0.631224 | 341.2697706  |
| Tea intake    id:ukb-b-6066                | rs17685     | 447485 | 0.023066 | 0.002362 | 1.60E-22  | A | G | 0.277512 | 95.36397544  |
| Tea intake    id:ukb-b-6066                | rs141071726 | 447485 | 0.040732 | 0.006812 | 2.20E-09  | A | G | 0.026713 | 35.75355444  |
| Tea intake    id:ukb-b-6066                | rs9648476   | 447485 | 0.012501 | 0.002185 | 1.10E-08  | A | G | 0.622954 | 32.72205182  |
| Tea intake    id:ukb-b-6066                | rs713598    | 447485 | 0.013397 | 0.002157 | 5.20E-10  | G | C | 0.402254 | 38.58988258  |
| Tea intake    id:ukb-b-6066                | rs13282783  | 447485 | -0.01358 | 0.002354 | 7.90E-09  | T | C | 0.285899 | 33.28933955  |
| Tea intake    id:ukb-b-6066                | rs56348300  | 447485 | 0.015882 | 0.002732 | 6.10E-09  | G | C | 0.184619 | 33.79866009  |
| Tea intake    id:ukb-b-6066                | rs10764990  | 447485 | -0.01219 | 0.002169 | 1.90E-08  | A | G | 0.607155 | 31.58923203  |
| Tea intake    id:ukb-b-6066                | rs10752269  | 447485 | -0.01287 | 0.00212  | 1.30E-09  | A | G | 0.506082 | 36.87822488  |
| Tea intake    id:ukb-b-6066                | rs2351187   | 447485 | 0.012902 | 0.002282 | 1.60E-08  | A | G | 0.318935 | 31.95867836  |
| Tea intake    id:ukb-b-6066                | rs17245213  | 447485 | -0.01465 | 0.002609 | 2.00E-08  | A | G | 0.208046 | 31.52084042  |
| Tea intake    id:ukb-b-6066                | rs10741694  | 447485 | 0.015004 | 0.002194 | 7.90E-12  | C | T | 0.627915 | 46.78446497  |
| Tea intake    id:ukb-b-6066                | rs1453548   | 447485 | -0.01334 | 0.002225 | 3.00E-09  | A | T | 0.664929 | 35.16754172  |
| Tea intake    id:ukb-b-6066                | rs977474    | 447485 | 0.021781 | 0.002856 | 2.40E-14  | T | C | 0.833746 | 58.18029093  |
| Tea intake    id:ukb-b-6066                | rs2783129   | 447485 | -0.01173 | 0.002133 | 3.80E-08  | G | C | 0.484878 | 30.25428023  |
| Tea intake    id:ukb-b-6066                | rs17576658  | 447485 | -0.01348 | 0.002457 | 4.10E-08  | A | G | 0.247081 | 30.11659629  |
| Tea intake    id:ukb-b-6066                | rs6829      | 447485 | -0.01192 | 0.002165 | 3.70E-08  | T | C | 0.596155 | 30.28185843  |
| Tea intake    id:ukb-b-6066                | rs2645929   | 447485 | -0.01498 | 0.002717 | 3.50E-08  | G | A | 0.813066 | 30.42395917  |
| Tea intake    id:ukb-b-6066                | rs12591786  | 447485 | -0.01844 | 0.002942 | 3.70E-10  | T | C | 0.158804 | 39.27397356  |
| Tea intake    id:ukb-b-6066                | rs2472297   | 447485 | 0.053345 | 0.002401 | 2.30E-109 | T | C | 0.262049 | 493.6455641  |
| Tea intake    id:ukb-b-6066                | rs9937354   | 447485 | -0.01409 | 0.002143 | 4.90E-11  | A | G | 0.424074 | 43.23125388  |
| Tea intake    id:ukb-b-6066                | rs9302428   | 447485 | 0.012246 | 0.002201 | 2.60E-08  | G | C | 0.635799 | 30.94855178  |
| Tea intake    id:ukb-b-6066                | rs2279844   | 447485 | -0.01199 | 0.002183 | 4.00E-08  | A | G | 0.379343 | 30.15137588  |
| Tea intake    id:ukb-b-6066                | rs4808193   | 447485 | 0.015115 | 0.002247 | 1.70E-11  | C | T | 0.335324 | 45.24046958  |
| Tea intake    id:ukb-b-6066                | rs57631352  | 447485 | -0.0131  | 0.002321 | 1.70E-08  | G | A | 0.296859 | 31.68843439  |
| Tea intake    id:ukb-b-6066                | rs2273447   | 447485 | 0.017472 | 0.002634 | 3.30E-11  | T | A | 0.203788 | 43.99057077  |
| Tea intake    id:ukb-b-6066                | rs4817505   | 447485 | 0.015068 | 0.002175 | 4.20E-12  | C | T | 0.38998  | 48.01229387  |
| Tea intake    id:ukb-b-6066                | rs132904    | 447485 | 0.016601 | 0.002553 | 7.80E-11  | C | G | 0.778651 | 42.29582311  |
| Tea intake    id:ukb-b-6066                | rs9624470   | 447485 | 0.025207 | 0.002155 | 1.30E-31  | A | G | 0.580054 | 136.8395635  |
| Alcohol intake frequency.    id:ukb-b-5779 | rs780569    | 462346 | 0.019803 | 0.003365 | 4.00E-09  | A | T | 0.70882  | 34.64365792  |
| Alcohol intake frequency.    id:ukb-b-5779 | rs4503294   | 462346 | 0.018148 | 0.00307  | 3.40E-09  | T | C | 0.565333 | 34.93196544  |
| Alcohol intake frequency.    id:ukb-b-5779 | rs28787109  | 462346 | 0.017811 | 0.003085 | 7.70E-09  | A | G | 0.40423  | 33.33968197  |
| Alcohol intake frequency.    id:ukb-b-5779 | rs2244598   | 462346 | -0.01838 | 0.003119 | 3.80E-09  | C | T | 0.605114 | 34.7173247   |
| Alcohol intake frequency.    id:ukb-b-5779 | rs4417025   | 462346 | -0.01884 | 0.003165 | 2.70E-09  | A | G | 0.361153 | 35.42204553  |
| Alcohol intake frequency.    id:ukb-b-5779 | rs7514579   | 462346 | 0.019667 | 0.003598 | 4.60E-08  | C | A | 0.232457 | 28.98076555  |
| Alcohol intake frequency.    id:ukb-b-5779 | rs2717063   | 462346 | -0.02037 | 0.003085 | 4.00E-11  | A | C | 0.585731 | 43.61238661  |
| Alcohol intake frequency.    id:ukb-b-5779 | rs6727281   | 462346 | -0.02432 | 0.00392  | 5.50E-10  | T | C | 0.184023 | 38.5040317   |
| Alcohol intake frequency.    id:ukb-b-5779 | rs780094    | 462346 | -0.05099 | 0.003105 | 1.30E-60  | C | T | 0.615206 | 269.70085781 |
| Alcohol intake frequency.    id:ukb-b-5779 | rs13390019  | 462346 | 0.029612 | 0.004492 | 4.30E-11  | C | T | 0.134041 | 43.458933    |
| Alcohol intake frequency.    id:ukb-b-5779 | rs10188314  | 462346 | -0.01979 | 0.003036 | 7.20E-11  | T | C | 0.470852 | 42.47541969  |
| Alcohol intake frequency.    id:ukb-b-5779 | rs4241258   | 462346 | 0.025064 | 0.004403 | 1.30E-08  | T | C | 0.13763  | 32.3996422   |
| Alcohol intake frequency.    id:ukb-b-5779 | rs72769229  | 462346 | -0.02314 | 0.004192 | 3.40E-08  | T | A | 0.154942 | 30.464867    |
| Alcohol intake frequency.    id:ukb-b-5779 | rs17662759  | 462346 | 0.030135 | 0.00546  | 3.40E-08  | C | T | 0.089115 | 30.45804524  |
| Alcohol intake frequency.    id:ukb-b-5779 | rs1991083   | 462346 | -0.02239 | 0.003258 | 6.30E-12  | T | C | 0.679886 | 47.23548167  |
| Alcohol intake frequency.    id:ukb-b-5779 | rs473098    | 462346 | -0.02174 | 0.003043 | 9.10E-13  | T | C | 0.557689 | 51.02825402  |
| Alcohol intake frequency.    id:ukb-b-5779 | rs9829192   | 462346 | 0.016932 | 0.00305  | 2.80E-08  | T | G | 0.435133 | 30.81386917  |
| Alcohol intake frequency.    id:ukb-b-5779 | rs76082653  | 462346 | 0.046427 | 0.006687 | 3.80E-12  | T | C | 0.054327 | 48.2071878   |
| Alcohol intake frequency.    id:ukb-b-5779 | rs262240    | 462346 | -0.01721 | 0.003035 | 1.40E-08  | T | C | 0.468553 | 32.14708366  |
| Alcohol intake frequency.    id:ukb-b-5779 | rs9814516   | 462346 | -0.02511 | 0.003556 | 1.60E-12  | T | G | 0.237423 | 49.87186315  |
| Alcohol intake frequency.    id:ukb-b-5779 | rs7610856   | 462346 | -0.02386 | 0.00307  | 7.70E-15  | A | C | 0.429053 | 60.41537671  |
| Alcohol intake frequency.    id:ukb-b-5779 | rs1515591   | 462346 | 0.01823  | 0.003116 | 4.90E-09  | G | T | 0.383186 | 34.22119536  |
| Alcohol intake frequency.    id:ukb-b-5779 | rs1228589   | 462346 | 0.02107  | 0.003528 | 2.30E-09  | A | G | 0.246133 | 35.66588658  |
| Alcohol intake frequency.    id:ukb-b-5779 | rs28622224  | 462346 | -0.01862 | 0.003368 | 3.20E-08  | T | C | 0.280364 | 30.55916633  |
| Alcohol intake frequency.    id:ukb-b-5779 | rs13135092  | 462346 | 0.043834 | 0.005499 | 1.60E-15  | G | A | 0.083483 | 63.54509331  |
| Alcohol intake frequency.    id:ukb-b-5779 | rs11940694  | 462346 | -0.04371 | 0.003116 | 1.00E-44  | G | A | 0.604193 | 196.7963941  |
| Alcohol intake frequency.    id:ukb-b-5779 | rs362307    | 462346 | 0.043305 | 0.005802 | 8.40E-14  | T | C | 0.074582 | 55.70397358  |
| Alcohol intake frequency.    id:ukb-b-5779 | rs1229984   | 462346 | -0.26171 | 0.009185 | 1.40E-178 | C | T | 0.97277  | 811.8568483  |
| Alcohol intake frequency.    id:ukb-b-5779 | rs13102973  | 462346 | -0.01941 | 0.003119 | 4.90E-10  | C | T | 0.61881  | 38.72261133  |
| Alcohol intake frequency.    id:ukb-b-5779 | rs62339673  | 462346 | 0.018294 | 0.003154 | 6.60E-09  | A | C | 0.626705 | 33.64276576  |
| Alcohol intake frequency.    id:ukb-b-5779 | rs34811474  | 462346 | -0.02018 | 0.003593 | 1.90E-08  | A | G | 0.230728 | 31.54674383  |
| Alcohol intake frequency.    id:ukb-b-5779 | rs2159935   | 462346 | -0.01857 | 0.003026 | 8.30E-10  | A | G | 0.490369 | 37.68200968  |

|                                            |             |        |          |          |          |   |   |          |             |
|--------------------------------------------|-------------|--------|----------|----------|----------|---|---|----------|-------------|
| Alcohol intake frequency.    id:ukb-b-5779 | rs62305780  | 462346 | -0.04852 | 0.005066 | 9.90E-22 | G | C | 0.102253 | 91.74144456 |
| Alcohol intake frequency.    id:ukb-b-5779 | rs13178443  | 462346 | -0.01865 | 0.00339  | 3.80E-08 | T | C | 0.276349 | 30.27445602 |
| Alcohol intake frequency.    id:ukb-b-5779 | rs11750777  | 462346 | -0.02049 | 0.003726 | 3.80E-08 | A | G | 0.209454 | 30.24788927 |
| Alcohol intake frequency.    id:ukb-b-5779 | rs4916723   | 462346 | 0.023948 | 0.0031   | 1.10E-14 | C | A | 0.420617 | 59.69648887 |
| Alcohol intake frequency.    id:ukb-b-5779 | rs461599    | 462346 | -0.01919 | 0.00304  | 2.70E-10 | C | A | 0.462259 | 39.84870236 |
| Alcohol intake frequency.    id:ukb-b-5779 | rs56194430  | 462346 | 0.02254  | 0.004071 | 3.10E-08 | T | C | 0.16931  | 30.64889155 |
| Alcohol intake frequency.    id:ukb-b-5779 | rs9403297   | 462346 | 0.018823 | 0.00313  | 1.80E-09 | A | G | 0.372967 | 36.15803299 |
| Alcohol intake frequency.    id:ukb-b-5779 | rs9349379   | 462346 | -0.01935 | 0.003082 | 3.50E-10 | G | A | 0.405493 | 39.39602243 |
| Alcohol intake frequency.    id:ukb-b-5779 | rs12153855  | 462346 | 0.029444 | 0.004935 | 2.40E-09 | C | T | 0.10497  | 35.59858335 |
| Alcohol intake frequency.    id:ukb-b-5779 | rs9372625   | 462346 | -0.02556 | 0.003125 | 2.90E-16 | A | G | 0.381706 | 66.9024493  |
| Alcohol intake frequency.    id:ukb-b-5779 | rs62466318  | 462346 | -0.02549 | 0.003774 | 1.40E-11 | T | C | 0.202827 | 45.6199276  |
| Alcohol intake frequency.    id:ukb-b-5779 | rs2622167   | 462346 | -0.01912 | 0.003067 | 4.60E-10 | A | G | 0.428653 | 38.83564281 |
| Alcohol intake frequency.    id:ukb-b-5779 | rs73050128  | 462346 | -0.026   | 0.004091 | 2.10E-10 | A | C | 0.164488 | 40.40857686 |
| Alcohol intake frequency.    id:ukb-b-5779 | rs6943160   | 462346 | 0.020627 | 0.003728 | 3.10E-08 | C | T | 0.208646 | 30.6182884  |
| Alcohol intake frequency.    id:ukb-b-5779 | rs4726481   | 462346 | 0.021761 | 0.003102 | 2.30E-12 | T | G | 0.400576 | 49.21796788 |
| Alcohol intake frequency.    id:ukb-b-5779 | rs9648478   | 462346 | 0.01686  | 0.003029 | 2.60E-08 | A | G | 0.510245 | 30.98545356 |
| Alcohol intake frequency.    id:ukb-b-5779 | rs2160935   | 462346 | -0.01872 | 0.003091 | 1.40E-09 | T | C | 0.604293 | 36.66680814 |
| Alcohol intake frequency.    id:ukb-b-5779 | rs34440851  | 462346 | -0.02268 | 0.004151 | 4.60E-08 | T | C | 0.157151 | 29.8666998  |
| Alcohol intake frequency.    id:ukb-b-5779 | rs11787216  | 462346 | 0.024416 | 0.003201 | 2.40E-14 | T | C | 0.369127 | 58.18948292 |
| Alcohol intake frequency.    id:ukb-b-5779 | rs2977454   | 462346 | -0.02592 | 0.004599 | 1.70E-08 | G | C | 0.124072 | 31.77647113 |
| Alcohol intake frequency.    id:ukb-b-5779 | rs74679146  | 462346 | -0.03207 | 0.005758 | 2.50E-08 | C | T | 0.074515 | 31.03232076 |
| Alcohol intake frequency.    id:ukb-b-5779 | rs489062    | 462346 | 0.01665  | 0.003053 | 4.90E-08 | A | G | 0.437454 | 29.74336079 |
| Alcohol intake frequency.    id:ukb-b-5779 | rs34473884  | 462346 | -0.02036 | 0.003503 | 6.20E-09 | A | G | 0.24819  | 33.77732173 |
| Alcohol intake frequency.    id:ukb-b-5779 | rs61873510  | 462346 | 0.020374 | 0.003303 | 6.90E-10 | T | G | 0.32785  | 38.0446629  |
| Alcohol intake frequency.    id:ukb-b-5779 | rs4242715   | 462346 | -0.01865 | 0.003248 | 9.30E-09 | A | G | 0.680585 | 32.97941711 |
| Alcohol intake frequency.    id:ukb-b-5779 | rs10792669  | 462346 | 0.017432 | 0.003041 | 9.90E-09 | G | A | 0.505254 | 32.86786802 |
| Alcohol intake frequency.    id:ukb-b-5779 | rs11223617  | 462346 | 0.025091 | 0.003754 | 2.30E-11 | A | G | 0.206155 | 44.6770453  |
| Alcohol intake frequency.    id:ukb-b-5779 | rs550942    | 462346 | 0.022401 | 0.003989 | 2.00E-08 | T | C | 0.823865 | 31.53853961 |
| Alcohol intake frequency.    id:ukb-b-5779 | rs11039429  | 462346 | -0.02356 | 0.003037 | 8.70E-15 | T | C | 0.454624 | 60.16400522 |
| Alcohol intake frequency.    id:ukb-b-5779 | rs1666658   | 462346 | 0.017967 | 0.003099 | 6.70E-09 | C | T | 0.392206 | 33.62192855 |
| Alcohol intake frequency.    id:ukb-b-5779 | rs12312693  | 462346 | -0.01768 | 0.00305  | 6.80E-09 | C | T | 0.451772 | 33.60043049 |
| Alcohol intake frequency.    id:ukb-b-5779 | rs7302200   | 462346 | -0.01842 | 0.003198 | 8.40E-09 | A | G | 0.339998 | 33.17528913 |
| Alcohol intake frequency.    id:ukb-b-5779 | rs28768122  | 462346 | 0.0207   | 0.003552 | 5.60E-09 | C | T | 0.759525 | 33.96135389 |
| Alcohol intake frequency.    id:ukb-b-5779 | rs7298932   | 462346 | -0.02372 | 0.004312 | 3.80E-08 | G | A | 0.147849 | 30.26855022 |
| Alcohol intake frequency.    id:ukb-b-5779 | rs58905411  | 462346 | -0.02663 | 0.003078 | 5.10E-18 | A | G | 0.410052 | 74.85311902 |
| Alcohol intake frequency.    id:ukb-b-5779 | rs1937522   | 462346 | 0.016898 | 0.003032 | 2.50E-08 | G | A | 0.528054 | 31.05896823 |
| Alcohol intake frequency.    id:ukb-b-5779 | rs7330939   | 462346 | -0.02133 | 0.003405 | 3.70E-10 | T | C | 0.720352 | 39.25125918 |
| Alcohol intake frequency.    id:ukb-b-5779 | rs2535911   | 462346 | -0.01885 | 0.003168 | 2.70E-09 | T | C | 0.354749 | 35.3840411  |
| Alcohol intake frequency.    id:ukb-b-5779 | rs186347    | 462346 | 0.017949 | 0.003051 | 4.00E-09 | T | G | 0.463343 | 34.61575629 |
| Alcohol intake frequency.    id:ukb-b-5779 | rs80292319  | 462346 | -0.03937 | 0.006496 | 1.40E-09 | C | T | 0.057704 | 36.73865902 |
| Alcohol intake frequency.    id:ukb-b-5779 | rs117799466 | 462346 | -0.01967 | 0.00332  | 3.10E-09 | C | G | 0.336989 | 35.11025138 |
| Alcohol intake frequency.    id:ukb-b-5779 | rs34631026  | 462346 | -0.01691 | 0.003048 | 2.90E-08 | T | C | 0.446061 | 30.78292721 |
| Alcohol intake frequency.    id:ukb-b-5779 | rs72787062  | 462346 | -0.02819 | 0.004103 | 6.40E-12 | A | G | 0.162767 | 47.21512202 |
| Alcohol intake frequency.    id:ukb-b-5779 | rs35105141  | 462346 | 0.026345 | 0.003088 | 1.40E-17 | T | C | 0.401541 | 72.79064649 |
| Alcohol intake frequency.    id:ukb-b-5779 | rs1421085   | 462346 | 0.019939 | 0.003085 | 1.00E-10 | C | T | 0.403447 | 41.77905563 |
| Alcohol intake frequency.    id:ukb-b-5779 | rs1104608   | 462346 | 0.017421 | 0.003088 | 1.70E-08 | C | G | 0.426338 | 31.81733013 |
| Alcohol intake frequency.    id:ukb-b-5779 | rs8043563   | 462346 | 0.023365 | 0.003471 | 1.70E-11 | C | G | 0.737192 | 45.30797529 |
| Alcohol intake frequency.    id:ukb-b-5779 | rs2411453   | 462346 | -0.03508 | 0.00309  | 7.30E-30 | G | T | 0.597353 | 128.8472807 |
| Alcohol intake frequency.    id:ukb-b-5779 | rs728538    | 462346 | 0.022875 | 0.004063 | 1.80E-08 | G | T | 0.168868 | 31.70471177 |
| Alcohol intake frequency.    id:ukb-b-5779 | rs9906502   | 462346 | 0.023788 | 0.003962 | 1.90E-09 | A | G | 0.176998 | 36.05338973 |
| Alcohol intake frequency.    id:ukb-b-5779 | rs8614      | 462346 | 0.024781 | 0.003925 | 2.70E-10 | A | C | 0.182509 | 39.85313011 |
| Alcohol intake frequency.    id:ukb-b-5779 | rs4968391   | 462346 | -0.01927 | 0.003227 | 2.30E-09 | T | G | 0.674892 | 35.66790102 |
| Alcohol intake frequency.    id:ukb-b-5779 | rs9912298   | 462346 | 0.020589 | 0.00359  | 9.70E-09 | C | A | 0.239585 | 32.89390404 |
| Alcohol intake frequency.    id:ukb-b-5779 | rs17690703  | 462346 | 0.025034 | 0.00343  | 2.90E-13 | T | C | 0.262687 | 53.26304827 |
| Alcohol intake frequency.    id:ukb-b-5779 | rs650558    | 462346 | 0.020736 | 0.003508 | 3.40E-09 | T | C | 0.247918 | 34.94330164 |
| Alcohol intake frequency.    id:ukb-b-5779 | rs1893659   | 462346 | -0.02933 | 0.003053 | 7.60E-22 | A | C | 0.459939 | 92.2603435  |
| Alcohol intake frequency.    id:ukb-b-5779 | rs5022348   | 462346 | 0.020264 | 0.00357  | 1.40E-08 | T | C | 0.40703  | 32.21855383 |
| Alcohol intake frequency.    id:ukb-b-5779 | rs2043677   | 462346 | 0.026113 | 0.004327 | 1.60E-09 | T | C | 0.145599 | 36.41745392 |
| Alcohol intake frequency.    id:ukb-b-5779 | rs9958320   | 462346 | 0.024855 | 0.004271 | 5.90E-09 | C | T | 0.153147 | 33.86843628 |
| Alcohol intake frequency.    id:ukb-b-5779 | rs62097995  | 462346 | 0.020002 | 0.003067 | 6.90E-11 | A | T | 0.423591 | 42.53903583 |
| Alcohol intake frequency.    id:ukb-b-5779 | rs2924321   | 462346 | -0.01951 | 0.00305  | 1.60E-10 | A | G | 0.539592 | 40.92514357 |
| Alcohol intake frequency.    id:ukb-b-5779 | rs4940926   | 462346 | -0.0191  | 0.003441 | 2.80E-08 | C | T | 0.735045 | 30.81710309 |
| Alcohol intake frequency.    id:ukb-b-5779 | rs838145    | 462346 | 0.021955 | 0.003055 | 6.70E-13 | A | G | 0.542982 | 51.6294189  |
| Alcohol intake frequency.    id:ukb-b-5779 | rs6030200   | 462346 | -0.01953 | 0.003271 | 2.40E-09 | A | G | 0.31415  | 35.65047418 |
| Alcohol intake frequency.    id:ukb-b-5779 | rs11700855  | 462346 | -0.0298  | 0.005233 | 1.20E-08 | G | A | 0.093465 | 32.41892344 |
| Alcohol intake frequency.    id:ukb-b-5779 | rs71651683  | 462346 | -0.07046 | 0.012791 | 3.60E-08 | T | C | 0.0142   | 30.3451915  |
| Alcohol intake frequency.    id:ukb-b-5779 | rs1894544   | 462346 | 0.017393 | 0.003046 | 1.10E-08 | C | G | 0.454379 | 32.60071975 |

Table S3:SNPs removed due to associated with outcome or confounders

| trait                                      | SNP         | samplesize.exposure | beta.exposure | se.exposure | pval.exposure | effect_allele.exposure | other_allele.exposure | eaf.exposure |
|--------------------------------------------|-------------|---------------------|---------------|-------------|---------------|------------------------|-----------------------|--------------|
| Years of educational attainment in females | rs1008078   | 462630              | 0.01166       | 0.001806    | 1.10E-10      | T                      | C                     | 0.395512     |
| Years of educational attainment            | rs10140751  | 462630              | -0.01127      | 0.002047    | 3.60E-08      | T                      | G                     | 0.245951     |
| Years of educational attainment in females | rs10156602  | 448651              | 0.011006      | 0.001637    | 1.80E-11      | G                      | A                     | 0.361369     |
| Ever smoked                                | rs10161952  | 448651              | -0.00958      | 0.001686    | 1.30E-08      | C                      | A                     | 0.31274      |
| Alcohol intake frequency                   | rs10188314  | 462346              | -0.01979      | 0.003036    | 7.20E-11      | T                      | C                     | 0.470852     |
| Ever smoked                                | rs10192394  | 446462              | -0.00766      | 0.001229    | 4.50E-10      | T                      | C                     | 0.528785     |
| Ever smoked                                | rs1051730   | 461900              | -0.01088      | 0.001929    | 1.70E-08      | A                      | G                     | 0.331381     |
| Years of educational attainment in females | rs1073242   | 451486              | 0.015728      | 0.002292    | 6.70E-12      | A                      | G                     | 0.553825     |
| Usual walking pace                         | rs10740991  | 421764              | 0.016739      | 0.001857    | 2.00E-19      | C                      | G                     | 0.717606     |
| Usual walking pace                         | rs10828250  | 460443              | -0.02015      | 0.002073    | 2.60E-22      | G                      | C                     | 0.309332     |
| Usual walking pace                         | rs10828266  | 446462              | 0.012364      | 0.001357    | 8.10E-20      | G                      | A                     | 0.715634     |
| Usual walking pace                         | rs10838724  | 446462              | 0.009011      | 0.001283    | 2.10E-12      | T                      | G                     | 0.367992     |
| Years of educational attainment            | rs10883796  | 462630              | 0.011441      | 0.001934    | 3.30E-09      | A                      | G                     | 0.294358     |
| Time spent watching television             | rs10896050  | 451486              | -0.01847      | 0.002834    | 7.20E-11      | T                      | G                     | 0.193171     |
| Usual walking pace                         | rs10927006  | 457873              | -0.01374      | 0.001693    | 4.80E-16      | C                      | T                     | 0.143611     |
| Usual walking pace                         | rs11012726  | 427588              | -0.01224      | 0.001979    | 6.20E-10      | C                      | T                     | 0.307334     |
| Usual walking pace                         | rs11039429  | 462346              | -0.02356      | 0.003037    | 8.70E-15      | T                      | C                     | 0.454624     |
| Alcohol intake frequency                   | rs1104608   | 462346              | 0.017421      | 0.003088    | 1.70E-08      | C                      | G                     | 0.426338     |
| Alcohol intake frequency                   | rs1104608   | 441640              | 0.010863      | 0.001818    | 2.30E-09      | C                      | G                     | 0.426239     |
| Years of educational attainment in females | rs11130206  | 462630              | -0.01203      | 0.001776    | 1.20E-11      | G                      | C                     | 0.432321     |
| Alcohol intake frequency                   | rs11223617  | 462346              | 0.025091      | 0.003754    | 2.30E-11      | A                      | G                     | 0.206155     |
| Usual walking pace                         | rs11570094  | 457873              | 0.007546      | 0.001302    | 6.80E-09      | A                      | C                     | 0.295801     |
| Years of educational attainment in females | rs11586016  | 421764              | 0.009878      | 0.00173     | 1.10E-08      | C                      | G                     | 0.371004     |
| Alcohol intake frequency                   | rs11649653  | 451486              | 0.013849      | 0.002292    | 1.50E-09      | G                      | C                     | 0.38208      |
| Alcohol intake frequency                   | rs11700855  | 462346              | -0.0298       | 0.005233    | 1.20E-08      | G                      | A                     | 0.093465     |
| Years of educational attainment in females | rs11743441  | 460006              | -0.00884      | 0.001486    | 2.70E-09      | T                      | G                     | 0.574343     |
| Years of educational attainment            | rs11772627  | 421764              | 0.018334      | 0.002171    | 3.00E-17      | C                      | G                     | 0.18202      |
| Alcohol intake frequency                   | rs117799466 | 462346              | -0.01967      | 0.00332     | 3.10E-09      | C                      | G                     | 0.336989     |
| Years of educational attainment in females | rs11787216  | 462346              | 0.024416      | 0.003201    | 2.40E-14      | T                      | C                     | 0.369127     |
| Years of educational attainment in females | rs11811826  | 421764              | 0.013218      | 0.002006    | 4.40E-11      | A                      | T                     | 0.224231     |
| Alcohol intake frequency                   | rs11940694  | 462346              | -0.04371      | 0.003116    | 1.00E-44      | G                      | A                     | 0.604193     |
| Alcohol intake frequency                   | rs11940694  | 441640              | -0.01266      | 0.001834    | 5.00E-12      | G                      | A                     | 0.604068     |
| Years of educational attainment in females | rs12044599  | 446462              | 0.009421      | 0.001503    | 3.70E-10      | G                      | A                     | 0.21008      |
| Alcohol intake frequency                   | rs12153855  | 462346              | 0.029444      | 0.004935    | 2.40E-09      | C                      | T                     | 0.10497      |
| Years of educational attainment in males   | rs12247907  | 461053              | 0.009841      | 0.001711    | 8.90E-09      | C                      | G                     | 0.485752     |
| Alcohol intake frequency                   | rs1228589   | 462346              | 0.02107       | 0.003528    | 2.30E-09      | A                      | G                     | 0.246133     |
| Alcohol intake frequency                   | rs1229984   | 462346              | -0.26171      | 0.009185    | 1.40E-178     | C                      | T                     | 0.97277      |
| Alcohol intake frequency                   | rs12312693  | 462346              | -0.01768      | 0.00305     | 6.80E-09      | C                      | T                     | 0.451772     |
| Years of educational attainment in males   | rs12354267  | 441640              | 0.011647      | 0.001933    | 1.70E-09      | C                      | T                     | 0.309145     |
| Alcohol intake frequency                   | rs1260326   | 460880              | -0.00955      | 0.001655    | 7.90E-09      | C                      | T                     | 0.604249     |
| Alcohol intake frequency                   | rs1260326   | 457873              | -0.00919      | 0.00121     | 3.20E-14      | C                      | T                     | 0.604332     |
| Ever smoked                                | rs12855717  | 460443              | -0.01223      | 0.001923    | 2.00E-10      | T                      | C                     | 0.526774     |
| Alcohol intake frequency                   | rs1291145   | 451486              | -0.02025      | 0.00241     | 4.40E-17      | C                      | T                     | 0.685848     |
| Alcohol intake frequency                   | rs13070166  | 460443              | 0.014211      | 0.002278    | 4.40E-10      | A                      | T                     | 0.228586     |
| Alcohol intake frequency                   | rs13102973  | 462346              | -0.01941      | 0.003119    | 4.90E-10      | C                      | T                     | 0.61881      |
| Usual walking pace                         | rs13107325  | 451486              | -0.02916      | 0.004253    | 7.00E-12      | T                      | C                     | 0.074693     |
| Usual walking pace                         | rs13135092  | 462346              | 0.043834      | 0.005499    | 1.60E-15      | G                      | A                     | 0.083483     |
| Years of educational attainment            | rs13163336  | 428860              | 0.014947      | 0.00221     | 1.30E-11      | A                      | C                     | 0.15761      |
| Alcohol intake frequency                   | rs13178443  | 462346              | -0.01865      | 0.00339     | 3.80E-08      | T                      | C                     | 0.276349     |
| Alcohol intake frequency                   | rs13234131  | 441640              | 0.017012      | 0.00266     | 1.60E-10      | G                      | A                     | 0.128369     |
| Years of educational attainment in females | rs1338549   | 428860              | -0.00945      | 0.001622    | 5.60E-09      | G                      | T                     | 0.533932     |
| Alcohol intake frequency                   | rs13390019  | 462346              | 0.029612      | 0.004492    | 4.30E-11      | C                      | T                     | 0.134041     |
| Alcohol intake frequency                   | rs1375566   | 446462              | -0.00783      | 0.001266    | 6.10E-10      | A                      | G                     | 0.627412     |
| Usual walking pace                         | rs1421085   | 460443              | 0.018481      | 0.001949    | 2.50E-21      | C                      | T                     | 0.40341      |
| Usual walking pace                         | rs1421085   | 428860              | 0.018543      | 0.001644    | 1.70E-29      | C                      | T                     | 0.40357      |
| Usual walking pace                         | rs1421085   | 461053              | -0.01212      | 0.001743    | 3.50E-12      | C                      | T                     | 0.403433     |
| Usual walking pace                         | rs1421085   | 448651              | 0.010332      | 0.001591    | 8.30E-11      | C                      | T                     | 0.40346      |
| Usual walking pace                         | rs1421085   | 462346              | 0.019939      | 0.003085    | 1.00E-10      | C                      | T                     | 0.403447     |
| Usual walking pace                         | rs1421085   | 427588              | 0.01201       | 0.001846    | 7.70E-11      | C                      | T                     | 0.403711     |
| Years of educational attainment            | rs1422192   | 461981              | 0.016968      | 0.002871    | 3.40E-09      | A                      | G                     | 0.158076     |
| Ever smoked                                | rs1453548   | 447485              | -0.01334      | 0.00225     | 3.00E-09      | A                      | T                     | 0.664929     |
| Coffee consumption cups per day            | rs1481012   | 447485              | -0.02624      | 0.003356    | 5.30E-15      | G                      | A                     | 0.112209     |
| Usual walking pace                         | rs1513475   | 457873              | -0.00891      | 0.001244    | 7.80E-13      | C                      | T                     | 0.34937      |
| Alcohol intake frequency                   | rs1515591   | 462346              | 0.01823       | 0.003116    | 4.90E-09      | G                      | T                     | 0.383186     |
| Years of educational attainment in females | rs1620977   | 446462              | -0.01317      | 0.001378    | 1.10E-21      | G                      | A                     | 0.730517     |
| Alcohol intake frequency                   | rs1666658   | 462346              | 0.017967      | 0.003099    | 6.70E-09      | C                      | T                     | 0.392206     |
| Alcohol intake frequency                   | rs1680349   | 457873              | -0.00673      | 0.001198    | 1.90E-08      | A                      | G                     | 0.563781     |
| Years of educational attainment            | rs16822430  | 460880              | 0.011634      | 0.00192     | 1.40E-09      | C                      | T                     | 0.23321      |
| Ever smoked                                | rs16891727  | 460443              | -0.02372      | 0.00284     | 6.80E-17      | A                      | C                     | 0.129814     |

|                                            |            |        |          |          |           |   |   |          |
|--------------------------------------------|------------|--------|----------|----------|-----------|---|---|----------|
| Alcohol intake frequency                   | rs17023019 | 457873 | 0.012121 | 0.001242 | 1.70E-22  | G | A | 0.647408 |
| Alcohol intake frequency                   | rs17175518 | 421764 | 0.011496 | 0.001975 | 5.90E-09  | A | C | 0.232775 |
| Alcohol intake frequency                   | rs1726866  | 462630 | 0.026544 | 0.00177  | 7.70E-51  | A | G | 0.552077 |
| Ever smoked                                | rs17409597 | 457873 | -0.00699 | 0.001194 | 4.90E-09  | C | T | 0.491526 |
| Alcohol intake frequency                   | rs17662759 | 462346 | 0.030135 | 0.00546  | 3.40E-08  | C | T | 0.089115 |
| Coffee consumption                         | rs17685    | 447485 | 0.023066 | 0.002362 | 1.60E-22  | A | G | 0.277512 |
| Years of educational attainment            | rs17690703 | 462346 | 0.025034 | 0.00343  | 2.90E-13  | T | C | 0.262687 |
| Alcohol intake frequency                   | rs17842490 | 428860 | -0.04517 | 0.006808 | 3.30E-11  | G | A | 0.014248 |
| Alcohol intake frequency                   | rs186347   | 462346 | 0.017949 | 0.003051 | 4.00E-09  | T | G | 0.463343 |
| Years of educational attainment            | rs1876245  | 460443 | 0.015116 | 0.001931 | 5.00E-15  | C | T | 0.431482 |
| Alcohol intake frequency                   | rs1894544  | 462346 | 0.017393 | 0.003046 | 1.10E-08  | C | G | 0.454379 |
| Alcohol intake frequency                   | rs1991083  | 462346 | -0.02239 | 0.003258 | 6.30E-12  | T | C | 0.679886 |
| Alcohol intake frequency                   | rs2043677  | 462346 | 0.026113 | 0.004327 | 1.60E-09  | T | C | 0.145599 |
| Years of educational attainment            | rs2048522  | 446462 | 0.009563 | 0.001248 | 1.80E-14  | T | A | 0.434968 |
| Alcohol intake frequency                   | rs2159935  | 462346 | -0.01857 | 0.003026 | 8.30E-10  | A | G | 0.490369 |
| Alcohol intake frequency                   | rs2160935  | 462346 | -0.01872 | 0.003091 | 1.40E-09  | T | C | 0.604293 |
| Years of educational attainment            | rs2189234  | 428860 | 0.009987 | 0.001661 | 1.80E-09  | G | T | 0.617795 |
| Alcohol intake frequency                   | rs2194027  | 435435 | -0.00861 | 0.001436 | 2.00E-09  | A | T | 0.484664 |
| Ever smoked                                | rs2198234  | 427588 | 0.01167  | 0.001816 | 1.30E-10  | T | G | 0.528757 |
| Alcohol intake frequency                   | rs2244598  | 462346 | -0.01838 | 0.003119 | 3.80E-09  | C | T | 0.605114 |
| Time spent watching television             | rs2252508  | 448651 | 0.009102 | 0.001562 | 5.70E-09  | G | A | 0.480256 |
| Years of educational attainment in females | rs2352974  | 451486 | -0.0145  | 0.002243 | 1.00E-10  | T | C | 0.48979  |
| Usual walking pace                         | rs2411453  | 462346 | -0.03508 | 0.00309  | 7.30E-30  | G | T | 0.597353 |
| Coffee consumption                         | rs2472297  | 457873 | -0.01539 | 0.001345 | 2.60E-30  | T | C | 0.261771 |
| Coffee consumption                         | rs2472297  | 428860 | 0.046471 | 0.001827 | 1.10E-142 | T | C | 0.262883 |
| Coffee consumption                         | rs2472297  | 427588 | -0.03342 | 0.002057 | 2.40E-59  | T | C | 0.26061  |
| Coffee consumption                         | rs2472297  | 447485 | 0.053345 | 0.002401 | 2.30E-109 | T | C | 0.262049 |
| Coffee consumption                         | rs2472297  | 441640 | -0.01585 | 0.002022 | 4.50E-15  | T | C | 0.261458 |
| Alcohol intake frequency                   | rs2535911  | 462346 | -0.01885 | 0.003168 | 2.70E-09  | T | C | 0.354749 |
| Alcohol intake frequency                   | rs2622167  | 462346 | -0.01912 | 0.003067 | 4.60E-10  | A | G | 0.428653 |
| Alcohol intake frequency                   | rs262240   | 462346 | -0.01721 | 0.003035 | 1.40E-08  | T | C | 0.468553 |
| Ever smoked                                | rs264932   | 462630 | -0.01042 | 0.001802 | 7.30E-09  | G | A | 0.605889 |
| Years of educational attainment in females | rs26579    | 451486 | -0.0128  | 0.002294 | 2.40E-08  | C | G | 0.586217 |
| Alcohol intake frequency                   | rs2717063  | 462346 | -0.02037 | 0.003085 | 4.00E-11  | A | C | 0.585731 |
| Alcohol intake frequency                   | rs2726033  | 460006 | -0.00949 | 0.00148  | 1.50E-10  | G | A | 0.422384 |
| Years of educational attainment            | rs2728784  | 457873 | -0.01101 | 0.001463 | 5.30E-14  | G | A | 0.208554 |
| Years of educational attainment in females | rs2736748  | 462630 | 0.028012 | 0.00216  | 1.80E-38  | G | A | 0.789193 |
| Ever smoked                                | rs2799849  | 441640 | -0.01233 | 0.001906 | 9.80E-11  | T | C | 0.678123 |
| Years of educational attainment in males   | rs2802530  | 451486 | 0.018627 | 0.003397 | 4.20E-08  | A | G | 0.876502 |
| Alcohol intake frequency                   | rs28479795 | 446462 | 0.011232 | 0.001473 | 2.50E-14  | T | C | 0.221473 |
| Years of educational attainment in females | rs28768122 | 462346 | 0.0207   | 0.003552 | 5.60E-09  | C | T | 0.759525 |
| Alcohol intake frequency                   | rs2924321  | 462346 | -0.01951 | 0.00305  | 1.60E-10  | A | G | 0.539592 |
| Years of educational attainment            | rs2960578  | 451486 | 0.017028 | 0.002236 | 2.60E-14  | G | T | 0.496281 |
| Ever smoked                                | rs3095337  | 435435 | -0.01262 | 0.001766 | 9.00E-13  | C | G | 0.203909 |
| Years of educational attainment            | rs3101339  | 421764 | 0.01426  | 0.001705 | 6.20E-17  | C | A | 0.603285 |
| Alcohol intake frequency                   | rs34060476 | 428860 | 0.018429 | 0.00237  | 7.50E-15  | G | A | 0.133855 |
| Alcohol intake frequency                   | rs34161520 | 460162 | 0.011592 | 0.002021 | 9.60E-09  | G | C | 0.160381 |
| Years of educational attainment            | rs34186148 | 435435 | -0.00805 | 0.001475 | 4.80E-08  | C | G | 0.370054 |
| Years of educational attainment            | rs34198643 | 451486 | -0.0167  | 0.002679 | 4.50E-10  | T | C | 0.224165 |
| Years of educational attainment            | rs34473884 | 462346 | -0.02036 | 0.003503 | 6.20E-09  | A | G | 0.24819  |
| Years of educational attainment in females | rs34619    | 447485 | 0.011712 | 0.002138 | 4.30E-08  | A | G | 0.430905 |
| Alcohol intake frequency                   | rs34631026 | 462346 | -0.01691 | 0.003048 | 2.90E-08  | T | C | 0.446061 |
| Usual walking pace                         | rs34811474 | 462346 | -0.02018 | 0.003593 | 1.90E-08  | A | G | 0.230728 |
| Alcohol intake frequency                   | rs35105141 | 462346 | 0.026345 | 0.003088 | 1.40E-17  | T | C | 0.401541 |
| Alcohol intake frequency                   | rs362307   | 462346 | 0.043305 | 0.005802 | 8.40E-14  | T | C | 0.074582 |
| Alcohol intake frequency                   | rs4002471  | 460443 | -0.01924 | 0.001924 | 1.50E-23  | T | C | 0.547362 |
| Years of educational attainment in males   | rs4149513  | 421764 | 0.01173  | 0.001671 | 2.20E-12  | A | G | 0.493537 |
| Ever smoked                                | rs4235642  | 462630 | 0.012294 | 0.001816 | 1.30E-11  | G | A | 0.379691 |
| Time spent watching television             | rs4240672  | 461981 | 0.01712  | 0.002094 | 3.00E-16  | A | G | 0.494014 |
| Alcohol intake frequency                   | rs4241258  | 462346 | 0.025064 | 0.004403 | 1.30E-08  | T | C | 0.13763  |
| Alcohol intake frequency                   | rs4242715  | 462346 | -0.01865 | 0.003248 | 9.30E-09  | A | G | 0.680585 |
| Alcohol intake frequency                   | rs4291983  | 435435 | -0.0084  | 0.001425 | 3.70E-09  | A | C | 0.517576 |
| Years of educational attainment in females | rs4302893  | 446462 | 0.007389 | 0.0013   | 1.30E-08  | A | G | 0.334189 |
| Coffee consumption                         | rs4410790  | 457873 | -0.01096 | 0.001229 | 4.80E-19  | C | T | 0.630852 |
| Coffee consumption                         | rs4410790  | 447485 | 0.040551 | 0.002195 | 3.40E-76  | C | T | 0.631224 |
| Coffee consumption                         | rs4410790  | 428860 | 0.039072 | 0.001673 | 1.20E-120 | C | T | 0.632141 |
| Coffee consumption                         | rs4410790  | 427588 | -0.03087 | 0.001877 | 8.60E-61  | C | T | 0.629877 |
| Coffee consumption                         | rs4410790  | 441640 | -0.01091 | 0.001847 | 3.40E-09  | C | T | 0.630668 |
| Alcohol intake frequency                   | rs4417025  | 462346 | -0.01884 | 0.003165 | 2.70E-09  | A | G | 0.361153 |
| Time spent watching television             | rs4503172  | 451486 | 0.01296  | 0.002293 | 1.60E-08  | T | C | 0.608301 |
| Alcohol intake frequency                   | rs4503294  | 462346 | 0.018148 | 0.00307  | 3.40E-09  | T | C | 0.565333 |
| Alcohol intake frequency                   | rs4510068  | 460443 | -0.01301 | 0.001971 | 4.00E-11  | T | G | 0.402798 |
| Years of educational attainment in females | rs45501495 | 460443 | 0.01568  | 0.002257 | 3.70E-12  | T | C | 0.236013 |
| Alcohol intake frequency                   | rs461599   | 462346 | -0.01919 | 0.00304  | 2.70E-10  | C | A | 0.462259 |
| Alcohol intake frequency                   | rs4665972  | 452236 | -0.01424 | 0.002043 | 3.20E-12  | C | T | 0.604541 |
| Alcohol intake frequency                   | rs4726481  | 462346 | 0.021761 | 0.003102 | 2.30E-12  | T | G | 0.400576 |

|                                            |            |        |          |          |          |   |   |          |
|--------------------------------------------|------------|--------|----------|----------|----------|---|---|----------|
| Alcohol intake frequency                   | rs473098   | 462346 | -0.02174 | 0.003043 | 9.10E-13 | T | C | 0.557689 |
| Alcohol intake frequency                   | rs4739105  | 462630 | 0.015465 | 0.00218  | 1.30E-12 | C | T | 0.787781 |
| Alcohol intake frequency                   | rs476828   | 428860 | 0.017346 | 0.001895 | 5.60E-20 | C | T | 0.237409 |
| Years of educational attainment in females | rs4799949  | 462630 | -0.01098 | 0.001872 | 4.50E-09 | T | C | 0.667226 |
| Years of educational attainment            | rs4800488  | 421764 | 0.011984 | 0.001672 | 7.70E-13 | A | C | 0.489858 |
| Ever smoked                                | rs4851029  | 448651 | 0.010174 | 0.001564 | 7.80E-11 | G | T | 0.526969 |
| Years of educational attainment            | rs4860797  | 462630 | 0.011667 | 0.001808 | 1.10E-10 | A | G | 0.601276 |
| Alcohol intake frequency                   | rs489062   | 462346 | 0.01665  | 0.003053 | 4.90E-08 | A | G | 0.437454 |
| Alcohol intake frequency                   | rs4916723  | 462346 | 0.023948 | 0.0031   | 1.10E-14 | C | A | 0.420617 |
| Alcohol intake frequency                   | rs4940926  | 462346 | -0.0191  | 0.003441 | 2.80E-08 | C | T | 0.735045 |
| Alcohol intake frequency                   | rs4953150  | 446462 | -0.00844 | 0.001293 | 6.60E-11 | T | C | 0.344088 |
| Alcohol intake frequency                   | rs4968391  | 462346 | -0.01927 | 0.003227 | 2.30E-09 | T | G | 0.674892 |
| Ever smoked                                | rs4984685  | 452236 | 0.013585 | 0.002481 | 4.40E-08 | A | G | 0.201006 |
| Alcohol intake frequency                   | rs504675   | 451486 | 0.027442 | 0.002342 | 1.00E-31 | T | C | 0.352634 |
| Alcohol intake frequency                   | rs528301   | 462630 | 0.015261 | 0.00177  | 6.60E-18 | A | G | 0.554846 |
| Time spent watching television             | rs531358   | 451486 | 0.013167 | 0.002337 | 1.80E-08 | T | C | 0.649768 |
| Alcohol intake frequency                   | rs550942   | 462346 | 0.022401 | 0.003989 | 2.00E-08 | T | C | 0.823865 |
| Usual walking pace                         | rs56094641 | 460880 | 0.012588 | 0.001651 | 2.50E-14 | G | A | 0.404619 |
| Alcohol intake frequency                   | rs58905411 | 462346 | -0.02663 | 0.003078 | 5.10E-18 | A | G | 0.410052 |
| Time spent watching television             | rs6010651  | 461981 | -0.01241 | 0.002168 | 1.10E-08 | C | A | 0.379439 |
| Alcohol intake frequency                   | rs6030200  | 462346 | -0.01953 | 0.003271 | 2.40E-09 | A | G | 0.31415  |
| Alcohol intake frequency                   | rs61873510 | 462346 | 0.020374 | 0.003303 | 6.90E-10 | T | G | 0.32785  |
| Years of educational attainment            | rs62034322 | 451486 | -0.01394 | 0.0023   | 1.40E-09 | A | G | 0.379848 |
| Years of educational attainment            | rs62097995 | 462346 | 0.020002 | 0.003067 | 6.90E-11 | A | T | 0.423591 |
| Alcohol intake frequency                   | rs62305780 | 462346 | -0.04852 | 0.005066 | 9.90E-22 | G | C | 0.102253 |
| Alcohol intake frequency                   | rs62339673 | 462346 | 0.018294 | 0.003154 | 6.60E-09 | A | C | 0.626705 |
| Years of educational attainment in females | rs62396185 | 461053 | -0.01484 | 0.001951 | 2.80E-14 | C | G | 0.260057 |
| Years of educational attainment            | rs62442924 | 441640 | 0.012731 | 0.002257 | 1.70E-08 | T | C | 0.194276 |
| Alcohol intake frequency                   | rs62466318 | 462346 | -0.02549 | 0.003774 | 1.40E-11 | T | C | 0.202827 |
| Usual walking pace                         | rs6482190  | 435435 | 0.011272 | 0.00159  | 1.40E-12 | G | A | 0.719408 |
| Alcohol intake frequency                   | rs650558   | 462346 | 0.020736 | 0.003508 | 3.40E-09 | T | C | 0.247918 |
| Years of educational attainment            | rs6727281  | 462346 | -0.02432 | 0.00392  | 5.50E-10 | T | C | 0.184023 |
| Alcohol intake frequency                   | rs6780346  | 462630 | -0.01684 | 0.001817 | 1.90E-20 | T | C | 0.620997 |
| Ever smoked                                | rs6887291  | 462630 | 0.012676 | 0.001836 | 5.10E-12 | G | T | 0.636126 |
| Alcohol intake frequency                   | rs6957745  | 427588 | -0.01529 | 0.002262 | 1.40E-11 | C | T | 0.202686 |
| Alcohol intake frequency                   | rs6957745  | 460880 | -0.01218 | 0.002023 | 1.80E-09 | C | T | 0.202978 |
| Alcohol intake frequency                   | rs713598   | 447485 | 0.013397 | 0.002157 | 5.20E-10 | G | C | 0.402254 |
| Alcohol intake frequency                   | rs71386942 | 451486 | 0.014455 | 0.002522 | 9.90E-09 | A | C | 0.268947 |
| Alcohol intake frequency                   | rs71651683 | 462346 | -0.07046 | 0.012791 | 3.60E-08 | T | C | 0.0142   |
| Years of educational attainment in females | rs7243428  | 460443 | -0.01298 | 0.002292 | 1.50E-08 | G | A | 0.224648 |
| Alcohol intake frequency                   | rs72787062 | 462346 | -0.02819 | 0.004103 | 6.40E-12 | A | G | 0.162767 |
| Alcohol intake frequency                   | rs728538   | 462346 | 0.022875 | 0.004063 | 1.80E-08 | G | T | 0.168868 |
| Years of educational attainment in females | rs7302200  | 462346 | -0.01842 | 0.003198 | 8.40E-09 | A | G | 0.339998 |
| Alcohol intake frequency                   | rs73050128 | 462346 | -0.026   | 0.004091 | 2.10E-10 | A | C | 0.164488 |
| Time spent watching television             | rs73096946 | 451486 | -0.02059 | 0.003067 | 1.90E-11 | C | T | 0.157396 |
| Alcohol intake frequency                   | rs7330939  | 462346 | -0.02133 | 0.003405 | 3.70E-10 | T | C | 0.720352 |
| Time spent watching television             | rs73802707 | 452236 | -0.01593 | 0.002762 | 8.00E-09 | T | C | 0.153694 |
| Time spent watching television             | rs7386207  | 451486 | -0.0125  | 0.002269 | 3.60E-08 | T | C | 0.563517 |
| Alcohol intake frequency                   | rs739320   | 446462 | -0.009   | 0.001277 | 1.90E-12 | C | T | 0.60575  |
| Alcohol intake frequency                   | rs7514579  | 462346 | 0.019667 | 0.003598 | 4.60E-08 | C | A | 0.232457 |
| Years of educational attainment            | rs7531118  | 461981 | -0.01407 | 0.002113 | 2.80E-11 | C | T | 0.531133 |
| Years of educational attainment            | rs75641275 | 421764 | -0.01416 | 0.002385 | 2.90E-09 | C | A | 0.143372 |
| Years of educational attainment in females | rs7599488  | 421764 | -0.01042 | 0.001687 | 6.70E-10 | T | C | 0.426408 |
| Years of educational attainment in females | rs76082653 | 462346 | 0.046427 | 0.006687 | 3.80E-12 | T | C | 0.054327 |
| Years of educational attainment            | rs7610856  | 462346 | -0.02386 | 0.00307  | 7.70E-15 | A | C | 0.429053 |
| Alcohol intake frequency                   | rs780093   | 428860 | 0.013294 | 0.001657 | 1.00E-15 | C | T | 0.615839 |
| Alcohol intake frequency                   | rs780094   | 462346 | -0.05099 | 0.003105 | 1.30E-60 | C | T | 0.615206 |
| Alcohol intake frequency                   | rs780569   | 462346 | 0.019803 | 0.003365 | 4.00E-09 | A | T | 0.70882  |
| Ever smoked                                | rs782221   | 427588 | -0.01271 | 0.002262 | 1.90E-08 | T | C | 0.200429 |
| Time spent watching television             | rs7829800  | 461900 | 0.011458 | 0.001943 | 3.70E-09 | G | A | 0.670759 |
| Time spent watching television             | rs7829800  | 421764 | -0.01045 | 0.001787 | 5.10E-09 | G | A | 0.671041 |
| Years of educational attainment in females | rs7869969  | 446462 | 0.007567 | 0.001299 | 5.70E-09 | G | A | 0.330836 |
| Alcohol intake frequency                   | rs790561   | 435435 | 0.012474 | 0.001562 | 1.40E-15 | G | A | 0.704134 |
| Alcohol intake frequency                   | rs790564   | 460443 | 0.014691 | 0.002148 | 7.90E-12 | C | A | 0.722952 |
| Years of educational attainment in males   | rs7916868  | 421764 | 0.009607 | 0.001672 | 9.10E-09 | T | A | 0.503499 |
| Alcohol intake frequency                   | rs80292319 | 462346 | -0.03937 | 0.006496 | 1.40E-09 | C | T | 0.057704 |
| Alcohol intake frequency                   | rs8043563  | 462346 | 0.023365 | 0.003471 | 1.70E-11 | C | G | 0.737192 |
| Ever smoked                                | rs817223   | 446462 | -0.00727 | 0.001223 | 2.80E-09 | C | T | 0.481314 |
| Alcohol intake frequency                   | rs838133   | 461981 | 0.019014 | 0.002166 | 1.60E-18 | G | A | 0.549369 |
| Alcohol intake frequency                   | rs838133   | 441640 | -0.02065 | 0.001843 | 3.90E-29 | G | A | 0.549201 |
| Alcohol intake frequency                   | rs838133   | 448651 | 0.011688 | 0.001615 | 4.50E-13 | G | A | 0.549575 |
| Alcohol intake frequency                   | rs838133   | 460880 | 0.016184 | 0.001676 | 4.70E-22 | G | A | 0.549409 |
| Alcohol intake frequency                   | rs838133   | 460162 | 0.010894 | 0.001525 | 9.00E-13 | G | A | 0.549354 |
| Alcohol intake frequency                   | rs838145   | 462346 | 0.021955 | 0.003055 | 6.70E-13 | A | G | 0.542982 |
| Alcohol intake frequency                   | rs8614     | 462346 | 0.024781 | 0.003925 | 2.70E-10 | A | C | 0.182509 |
| Alcohol intake frequency                   | rs9349379  | 462346 | -0.01935 | 0.003082 | 3.50E-10 | G | A | 0.405493 |

|                                            |           |        |          |          |          |   |   |          |
|--------------------------------------------|-----------|--------|----------|----------|----------|---|---|----------|
| Years of educational attainment in females | rs9372625 | 462346 | -0.02556 | 0.003125 | 2.90E-16 | A | G | 0.381706 |
| Years of educational attainment in females | rs9372734 | 457873 | -0.00802 | 0.001188 | 1.40E-11 | T | C | 0.482495 |
| Years of educational attainment in females | rs9374896 | 441640 | 0.017527 | 0.001792 | 1.30E-22 | T | C | 0.466274 |
| Usual walking pace                         | rs9379832 | 460162 | -0.01147 | 0.001706 | 1.80E-11 | G | A | 0.255452 |
| Years of educational attainment in females | rs9385269 | 421764 | 0.012067 | 0.001682 | 7.20E-13 | T | C | 0.524565 |
| Alcohol intake frequency                   | rs9403297 | 462346 | 0.018823 | 0.00313  | 1.80E-09 | A | G | 0.372967 |
| Time spent watching television             | rs9517948 | 446462 | 0.006953 | 0.001233 | 1.70E-08 | T | C | 0.451352 |
| Usual walking pace                         | rs9648478 | 462346 | 0.01686  | 0.003029 | 2.60E-08 | A | G | 0.510245 |
| Years of educational attainment            | rs975303  | 451486 | 0.021276 | 0.002907 | 2.50E-13 | G | A | 0.181313 |
| Alcohol intake frequency                   | rs9814516 | 462346 | -0.02511 | 0.003556 | 1.60E-12 | T | G | 0.237423 |
| Alcohol intake frequency                   | rs9829192 | 462346 | 0.016932 | 0.00305  | 2.80E-08 | T | G | 0.435133 |
| Ever smoked                                | rs9835772 | 462630 | 0.011451 | 0.002052 | 2.40E-08 | T | A | 0.243664 |
| Ever smoked                                | rs9835772 | 457873 | -0.00808 | 0.001381 | 4.90E-09 | T | A | 0.243662 |
| Ever smoked                                | rs9843358 | 462630 | 0.018953 | 0.002344 | 6.20E-16 | T | C | 0.171903 |
| Alcohol intake frequency                   | rs9906502 | 462346 | 0.023788 | 0.003962 | 1.90E-09 | A | G | 0.176998 |
| Alcohol intake frequency                   | rs9912298 | 462346 | 0.020589 | 0.00359  | 9.70E-09 | C | A | 0.239585 |
| Years of educational attainment in males   | rs9919429 | 446462 | -0.00672 | 0.001223 | 3.80E-08 | G | A | 0.486008 |
| Alcohol intake frequency                   | rs9923768 | 461900 | 0.010512 | 0.001859 | 1.60E-08 | A | G | 0.59853  |
| Usual walking pace                         | rs9937354 | 447485 | -0.01409 | 0.002143 | 4.90E-11 | A | G | 0.424074 |
| Years of educational attainment in females | rs9997448 | 461900 | -0.01046 | 0.001883 | 2.70E-08 | T | C | 0.369236 |

Table S4:Palindromic SNPs with intermediate allele frequencies

| exposure                                      | SNP        | samplesiz<br>e.exposure | beta.expos<br>ure | se.exposur<br>e | pval.expos<br>ure | effect_allele<br>e.exposure | other_allele<br>e.exposure | eaf.exposu<br>re |
|-----------------------------------------------|------------|-------------------------|-------------------|-----------------|-------------------|-----------------------------|----------------------------|------------------|
| Beef intake    id:ukb-b-2862                  | rs9407624  | 461053                  | -0.01376          | 0.001716        | 1.10E-15          | A                           | T                          | 0.488187         |
| Bread intake    id:ukb-b-11348                | rs7276867  | 452236                  | 0.011348          | 0.002003        | 1.50E-08          | C                           | G                          | 0.541677         |
| Bread intake    id:ukb-b-11348                | rs9832088  | 452236                  | 0.014729          | 0.001989        | 1.30E-13          | A                           | T                          | 0.521617         |
| Bread intake    id:ukb-b-11348                | rs9881332  | 452236                  | 0.01137           | 0.002022        | 1.90E-08          | G                           | C                          | 0.581804         |
| Cereal intake    id:ukb-b-15926               | rs10837531 | 441640                  | 0.010784          | 0.001797        | 2.00E-09          | G                           | C                          | 0.455002         |
| Cereal intake    id:ukb-b-15926               | rs3859193  | 441640                  | -0.01033          | 0.001799        | 9.50E-09          | A                           | T                          | 0.470074         |
| Cereal intake    id:ukb-b-15926               | rs627185   | 441640                  | -0.01083          | 0.001791        | 1.50E-09          | G                           | C                          | 0.544427         |
| Cheese intake    id:ukb-b-1489                | rs1024853  | 451486                  | -0.01286          | 0.002262        | 1.30E-08          | G                           | C                          | 0.437902         |
| Coffee intake    id:ukb-b-5237                | rs10119174 | 428860                  | -0.0094           | 0.001642        | 1.00E-08          | C                           | G                          | 0.571035         |
| Dried fruit intake    id:ukb-b-16576          | rs11037497 | 421764                  | 0.01044           | 0.001684        | 5.70E-10          | C                           | G                          | 0.446175         |
| Fresh fruit intake    id:ukb-b-3881           | rs2302593  | 446462                  | 0.008528          | 0.001223        | 3.10E-12          | G                           | C                          | 0.486625         |
| Lamb/mutton intake    id:ukb-b-14179          | rs2140714  | 460006                  | -0.00852          | 0.001476        | 7.70E-09          | G                           | C                          | 0.557738         |
| Oily fish intake    id:ukb-b-2209             | rs11986122 | 460443                  | 0.014817          | 0.001949        | 2.90E-14          | G                           | C                          | 0.422568         |
| Oily fish intake    id:ukb-b-2209             | rs9886779  | 460443                  | -0.01072          | 0.001929        | 2.70E-08          | A                           | T                          | 0.439213         |
| Poultry intake    id:ukb-b-8006               | rs7046351  | 461900                  | 0.011075          | 0.001817        | 1.10E-09          | A                           | T                          | 0.509739         |
| Salad / raw vegetable intake    id:ukb-b-1996 | rs13102393 | 435435                  | 0.007979          | 0.00143         | 2.40E-08          | G                           | C                          | 0.499077         |
| Salad / raw vegetable intake    id:ukb-b-1996 | rs9427220  | 435435                  | -0.00801          | 0.001442        | 2.80E-08          | T                           | A                          | 0.554661         |
| Salt added to food    id:ukb-b-8121           | rs13084934 | 462630                  | -0.00968          | 0.001767        | 4.40E-08          | T                           | A                          | 0.494691         |
| Salt added to food    id:ukb-b-8121           | rs9375448  | 462630                  | -0.01168          | 0.001762        | 3.40E-11          | T                           | A                          | 0.492981         |
| Salt added to food    id:ukb-b-8121           | rs976179   | 462630                  | 0.010067          | 0.001765        | 1.20E-08          | T                           | A                          | 0.485324         |
| Hot drink temperature    id:ukb-b-14203       | rs12038134 | 457873                  | 0.006537          | 0.001187        | 3.60E-08          | A                           | T                          | 0.508213         |
| Hot drink temperature    id:ukb-b-14203       | rs58726064 | 457873                  | 0.006771          | 0.001196        | 1.50E-08          | G                           | C                          | 0.442086         |
| Tea intake    id:ukb-b-6066                   | rs2783129  | 447485                  | -0.01173          | 0.002133        | 3.80E-08          | G                           | C                          | 0.484878         |
| Alcohol intake frequency.    id:ukb-b-5779    | rs9958320  | 462346                  | 0.024855          | 0.004271        | 5.90E-09          | C                           | T                          | 0.153147         |

Table S5: Numbers of SNP in final analysis

| Dietary habits                                | Number of SNPs |
|-----------------------------------------------|----------------|
| Alcohol intake frequency    id:ukb-b-5779     | 14             |
| Beef intake    id:ukb-b-2862                  | 13             |
| Bread intake    id:ukb-b-11348                | 26             |
| Cereal intake    id:ukb-b-15926               | 30             |
| Cheese intake    id:ukb-b-1489                | 46             |
| Coffee intake    id:ukb-b-5237                | 29             |
| Cooked vegetable intake    id:ukb-b-8089      | 11             |
| Dried fruit intake    id:ukb-b-16576          | 29             |
| Fresh fruit intake    id:ukb-b-3881           | 39             |
| Hot drink temperature    id:ukb-b-14203       | 57             |
| Lamb/mutton intake    id:ukb-b-14179          | 29             |
| Non-oily fish intake    id:ukb-b-17627        | 6              |
| Oily fish intake    id:ukb-b-2209             | 50             |
| Pork intake    id:ukb-b-5640                  | 11             |
| Poultry intake    id:ukb-b-8006               | 3              |
| Processed meat intake    id:ukb-b-6324        | 18             |
| Salad / raw vegetable intake    id:ukb-b-1996 | 14             |
| Salt added to food    id:ukb-b-8121           | 87             |
| Tea intake    id:ukb-b-6066                   | 32             |
| Water intake    id:ukb-b-14898                | 34             |

Table S6: MR results of IVW method for association of dietary habits and chronic hip pain.

| Exposure                     | Number of SNPs | $\beta$ | $SE_{\beta}$ | $p$ -value   | adjusted $p$ value |
|------------------------------|----------------|---------|--------------|--------------|--------------------|
| Beef intake                  | 13             | -0.01   | 0.07         | 0.824        | 0.891              |
| Bread intake                 | 27             | 0.03    | 0.04         | 0.483        | 0.691              |
| Cereal intake                | 30             | -0.05   | 0.04         | 0.244        | 0.52               |
| Cheese intake                | 46             | -0.08   | 0.03         | <b>0.005</b> | 0.109              |
| Coffee intake                | 29             | 0.07    | 0.05         | 0.145        | 0.468              |
| Cooked vegetable intake      | 11             | 0.13    | 0.08         | 0.133        | 0.468              |
| Dried fruit intake           | 29             | -0.07   | 0.05         | 0.114        | 0.468              |
| Fresh fruit intake           | 39             | 0.07    | 0.05         | 0.174        | 0.468              |
| Lamb/mutton intake           | 29             | -0.11   | 0.05         | <b>0.033</b> | 0.217              |
| Non-oily fish intake         | 6              | -0.06   | 0.1          | 0.558        | 0.744              |
| Oily fish intake             | 50             | -0.07   | 0.03         | <b>0.027</b> | 0.217              |
| Pork intake                  | 11             | -0.02   | 0.09         | 0.847        | 0.891              |
| Poultry intake               | 3              | 0       | 0.15         | 0.985        | 0.985              |
| Processed meat intake        | 18             | 0.06    | 0.05         | 0.26         | 0.52               |
| Salad / raw vegetable intake | 14             | -0.08   | 0.11         | 0.443        | 0.691              |
| Salt added to food           | 87             | 0.03    | 0.02         | 0.187        | 0.468              |
| Water intake                 | 34             | -0.03   | 0.04         | 0.478        | 0.691              |
| Hot drink temperature        | 57             | -0.04   | 0.04         | 0.406        | 0.691              |
| Tea intake                   | 32             | 0.02    | 0.03         | 0.649        | 0.811              |
| Alcohol intake frequency     | 15             | -0.01   | 0.04         | 0.796        | 0.891              |

Table S7: MR results of IVW method for association of dietary habits and chronic headache.

| Exposure                     | Number of SNPs | $\beta$ | $SE_{\beta}$ | $p$ -value   | adjusted $p$ value |
|------------------------------|----------------|---------|--------------|--------------|--------------------|
| Beef intake                  | 13             | 0.02    | 0.09         | 0.814        | 0.904              |
| Bread intake                 | 27             | 0.03    | 0.03         | 0.428        | 0.892              |
| Cereal intake                | 30             | 0       | 0.04         | 0.907        | 0.907              |
| Cheese intake                | 46             | 0.04    | 0.03         | 0.158        | 0.892              |
| Coffee intake                | 29             | -0.05   | 0.05         | 0.388        | 0.892              |
| Cooked vegetable intake      | 11             | 0.01    | 0.07         | 0.846        | 0.904              |
| Dried fruit intake           | 29             | -0.05   | 0.04         | 0.249        | 0.892              |
| Fresh fruit intake           | 39             | -0.02   | 0.06         | 0.711        | 0.904              |
| Lamb/mutton intake           | 29             | 0.02    | 0.05         | 0.612        | 0.904              |
| Non-oily fish intake         | 6              | -0.11   | 0.14         | 0.446        | 0.892              |
| Oily fish intake             | 50             | -0.03   | 0.03         | 0.322        | 0.892              |
| Pork intake                  | 11             | 0.03    | 0.14         | 0.853        | 0.904              |
| Poultry intake               | 3              | -0.03   | 0.13         | 0.794        | 0.904              |
| Processed meat intake        | 18             | -0.02   | 0.04         | 0.63         | 0.904              |
| Salad / raw vegetable intake | 14             | 0.06    | 0.07         | 0.373        | 0.892              |
| Salt added to food           | 87             | 0       | 0.03         | 0.859        | 0.904              |
| Water intake                 | 34             | -0.06   | 0.05         | 0.243        | 0.892              |
| Hot drink temperature        | 57             | 0.08    | 0.05         | 0.091        | 0.892              |
| Tea intake                   | 32             | -0.08   | 0.03         | <b>0.008</b> | 0.155              |
| Alcohol intake frequency     | 15             | 0.03    | 0.04         | 0.506        | 0.904              |

Table S8: MR results of IVW method for association of dietary habits and chronic knee pain.

| Exposure                     | Number of SNPs | $\beta$ | $SE_{\beta}$ | $p$ -value   | adjusted $p$ value |
|------------------------------|----------------|---------|--------------|--------------|--------------------|
| Beef intake                  | 13             | -0.03   | 0.05         | 0.602        | 0.935              |
| Bread intake                 | 27             | -0.01   | 0.04         | 0.74         | 0.935              |
| Cereal intake                | 30             | 0       | 0.03         | 0.882        | 0.98               |
| Cheese intake                | 46             | -0.02   | 0.02         | 0.326        | 0.844              |
| Coffee intake                | 29             | 0.01    | 0.03         | 0.748        | 0.935              |
| Cooked vegetable intake      | 11             | 0.08    | 0.06         | 0.199        | 0.665              |
| Dried fruit intake           | 29             | -0.03   | 0.03         | 0.409        | 0.844              |
| Fresh fruit intake           | 39             | 0       | 0.04         | 0.999        | 0.999              |
| Lamb/mutton intake           | 29             | -0.1    | 0.04         | <b>0.009</b> | 0.171              |
| Non-oily fish intake         | 6              | 0.06    | 0.07         | 0.458        | 0.844              |
| Oily fish intake             | 50             | -0.04   | 0.03         | 0.134        | 0.619              |
| Pork intake                  | 11             | 0.02    | 0.06         | 0.746        | 0.935              |
| Poultry intake               | 3              | 0.18    | 0.11         | 0.084        | 0.585              |
| Processed meat intake        | 18             | 0.02    | 0.04         | 0.633        | 0.935              |
| Salad / raw vegetable intake | 14             | 0       | 0.08         | 0.983        | 0.999              |
| Salt added to food           | 87             | 0.01    | 0.02         | 0.464        | 0.844              |
| Water intake                 | 34             | -0.05   | 0.03         | 0.088        | 0.585              |
| Hot drink temperature        | 57             | 0.01    | 0.03         | 0.859        | 0.98               |
| Tea intake                   | 32             | -0.02   | 0.02         | 0.376        | 0.844              |
| Alcohol intake frequency     | 15             | 0.04    | 0.03         | 0.155        | 0.619              |

Table S9: MR results of WM method for association of dietary habits and multisite chronic pain.

| Exposure                     | Number of SNPs | $\beta$ | $SE_{\beta}$ | $p$ -value       | adjusted $p$ value |
|------------------------------|----------------|---------|--------------|------------------|--------------------|
| Beef intake                  | 13             | 0.04    | 0.10         | 0.684            | 0.912              |
| Bread intake                 | 26             | -0.06   | 0.06         | 0.298            | 0.481              |
| Cereal intake                | 30             | -0.24   | 0.06         | <b>&lt;0.001</b> | <b>0.002</b>       |
| Cheese intake                | 46             | -0.08   | 0.04         | 0.052            | 0.138              |
| Coffee intake                | 29             | 0.08    | 0.07         | 0.255            | 0.481              |
| Cooked vegetable intake      | 11             | -0.01   | 0.11         | 0.922            | 0.97               |
| Dried fruit intake           | 29             | -0.07   | 0.07         | 0.313            | 0.481              |
| Fresh fruit intake           | 39             | -0.17   | 0.08         | <b>0.026</b>     | 0.104              |
| Lamb/mutton intake           | 29             | 0.02    | 0.08         | 0.838            | 0.956              |
| Non-oily fish intake         | 6              | -0.25   | 0.14         | 0.072            | 0.159              |
| Oily fish intake             | 50             | 0.05    | 0.05         | 0.302            | 0.481              |
| Pork intake                  | 11             | 0.36    | 0.13         | <b>0.006</b>     | <b>0.028</b>       |
| Poultry intake               | 3              | 0.70    | 0.19         | <b>&lt;0.001</b> | <b>0.002</b>       |
| Processed meat intake        | 18             | 0.07    | 0.07         | 0.35             | 0.499              |
| Salad / raw vegetable intake | 14             | -0.25   | 0.12         | 0.038            | 0.127              |
| Salt added to food           | 87             | 0.07    | 0.04         | 0.055            | 0.138              |
| Water intake                 | 33             | 0.00    | 0.06         | 0.985            | 0.985              |
| Hot drink temperature        | 57             | -0.02   | 0.06         | 0.775            | 0.956              |
| Tea intake                   | 31             | -0.01   | 0.06         | 0.86             | 0.956              |
| Alcohol intake frequency     | 14             | 0.22    | 0.06         | <b>&lt;0.001</b> | <b>0.002</b>       |

Table S10: MR results of WM method for association of dietary habits and chronic back pain.

| Exposure                     | Number of SNPs | $\beta$ | $SE_{\beta}$ | $p$ -value   | adjusted $p$ value |
|------------------------------|----------------|---------|--------------|--------------|--------------------|
| Beef intake                  | 13             | 0       | 0.08         | 0.98         | 0.98               |
| Bread intake                 | 27             | 0.02    | 0.04         | 0.65         | 0.867              |
| Cereal intake                | 30             | -0.05   | 0.04         | 0.228        | 0.757              |
| Cheese intake                | 46             | -0.03   | 0.03         | 0.265        | 0.757              |
| Coffee intake                | 29             | -0.03   | 0.05         | 0.606        | 0.867              |
| Cooked vegetable intake      | 11             | 0.04    | 0.08         | 0.643        | 0.867              |
| Dried fruit intake           | 29             | -0.06   | 0.05         | 0.196        | 0.757              |
| Fresh fruit intake           | 39             | -0.05   | 0.06         | 0.425        | 0.849              |
| Lamb/mutton intake           | 29             | -0.01   | 0.06         | 0.927        | 0.98               |
| Non-oily fish intake         | 6              | 0.09    | 0.1          | 0.361        | 0.803              |
| Oily fish intake             | 50             | 0       | 0.03         | 0.96         | 0.98               |
| Pork intake                  | 11             | 0.32    | 0.09         | <b>0.001</b> | <b>0.011</b>       |
| Poultry intake               | 3              | 0.23    | 0.14         | 0.096        | 0.482              |
| Processed meat intake        | 18             | -0.05   | 0.05         | 0.338        | 0.803              |
| Salad / raw vegetable intake | 14             | 0.06    | 0.09         | 0.512        | 0.867              |
| Salt added to food           | 87             | 0.01    | 0.03         | 0.753        | 0.935              |
| Water intake                 | 34             | -0.02   | 0.04         | 0.584        | 0.867              |
| Hot drink temperature        | 57             | -0.01   | 0.05         | 0.795        | 0.935              |
| Tea intake                   | 32             | -0.06   | 0.04         | 0.089        | 0.482              |
| Alcohol intake frequency     | 15             | 0.09    | 0.04         | <b>0.016</b> | 0.158              |

Table S11: MR results of WM method for association of dietary habits and chronic hip pain.

| Exposure                     | Number of SNPs | $\beta$ | $SE_{\beta}$ | $p$ -value   | adjusted $p$ value |
|------------------------------|----------------|---------|--------------|--------------|--------------------|
| Beef intake                  | 13             | -0.01   | 0.09         | 0.926        | 0.952              |
| Bread intake                 | 27             | 0.06    | 0.05         | 0.296        | 0.658              |
| Cereal intake                | 30             | -0.07   | 0.06         | 0.261        | 0.658              |
| Cheese intake                | 46             | -0.08   | 0.04         | 0.053        | 0.526              |
| Coffee intake                | 29             | 0.07    | 0.06         | 0.283        | 0.658              |
| Cooked vegetable intake      | 11             | 0.1     | 0.11         | 0.372        | 0.697              |
| Dried fruit intake           | 29             | -0.08   | 0.06         | 0.217        | 0.658              |
| Fresh fruit intake           | 39             | 0.09    | 0.08         | 0.258        | 0.658              |
| Lamb/mutton intake           | 29             | -0.12   | 0.07         | 0.084        | 0.561              |
| Non-oily fish intake         | 6              | -0.1    | 0.13         | 0.425        | 0.708              |
| Oily fish intake             | 50             | -0.08   | 0.04         | <b>0.048</b> | 0.526              |
| Pork intake                  | 11             | 0.05    | 0.12         | 0.682        | 0.802              |
| Poultry intake               | 3              | 0.11    | 0.2          | 0.594        | 0.78               |
| Processed meat intake        | 18             | 0.1     | 0.07         | 0.143        | 0.658              |
| Salad / raw vegetable intake | 14             | -0.02   | 0.12         | 0.84         | 0.934              |
| Salt added to food           | 87             | 0.02    | 0.03         | 0.614        | 0.78               |
| Water intake                 | 34             | -0.03   | 0.06         | 0.624        | 0.78               |
| Hot drink temperature        | 57             | -0.05   | 0.06         | 0.383        | 0.697              |
| Tea intake                   | 32             | 0.03    | 0.05         | 0.493        | 0.758              |
| Alcohol intake frequency     | 15             | 0       | 0.05         | 0.952        | 0.952              |

Table S12: MR results of WM method for association of dietary habits and chronic neck/shoulder pain.

| Exposure                     | Number of SNPs | $\beta$ | $SE_{\beta}$ | $p$ -value  | adjusted $p$ value |
|------------------------------|----------------|---------|--------------|-------------|--------------------|
| Beef intake                  | 13             | -0.03   | 0.07         | 0.71        | 0.902              |
| Bread intake                 | 27             | -0.05   | 0.04         | 0.298       | 0.709              |
| Cereal intake                | 30             | -0.04   | 0.04         | 0.4         | 0.8                |
| Cheese intake                | 46             | -0.01   | 0.03         | 0.784       | 0.902              |
| Coffee intake                | 29             | 0.01    | 0.05         | 0.8         | 0.902              |
| Cooked vegetable intake      | 11             | 0.03    | 0.09         | 0.707       | 0.902              |
| Dried fruit intake           | 29             | -0.02   | 0.05         | 0.772       | 0.902              |
| Fresh fruit intake           | 39             | -0.08   | 0.06         | 0.167       | 0.477              |
| Lamb/mutton intake           | 29             | -0.11   | 0.06         | 0.053       | 0.32               |
| Non-oily fish intake         | 6              | -0.11   | 0.11         | 0.319       | 0.709              |
| Oily fish intake             | 50             | -0.06   | 0.03         | 0.059       | 0.32               |
| Pork intake                  | 11             | 0.18    | 0.1          | 0.064       | 0.32               |
| Poultry intake               | 3              | 0.32    | 0.15         | <b>0.03</b> | 0.32               |
| Processed meat intake        | 18             | -0.09   | 0.06         | 0.15        | 0.477              |
| Salad / raw vegetable intake | 14             | 0       | 0.09         | 0.957       | 0.957              |
| Salt added to food           | 87             | -0.01   | 0.03         | 0.702       | 0.902              |
| Water intake                 | 34             | 0.01    | 0.04         | 0.857       | 0.902              |
| Hot drink temperature        | 57             | 0.02    | 0.05         | 0.676       | 0.902              |
| Tea intake                   | 32             | 0.01    | 0.04         | 0.849       | 0.902              |
| Alcohol intake frequency     | 15             | 0.07    | 0.04         | 0.097       | 0.389              |

Table S13: MR results of WM method for association of dietary habits and chronic headache.

| Exposure                     | Number of SNPs | $\beta$ | $SE_{\beta}$ | $p$ -value | adjusted $p$ value |
|------------------------------|----------------|---------|--------------|------------|--------------------|
| Beef intake                  | 13             | 0.06    | 0.09         | 0.504      | 0.836              |
| Bread intake                 | 27             | 0.03    | 0.05         | 0.557      | 0.836              |
| Cereal intake                | 30             | 0.04    | 0.05         | 0.417      | 0.836              |
| Cheese intake                | 46             | 0       | 0.04         | 0.975      | 0.99               |
| Coffee intake                | 29             | -0.01   | 0.07         | 0.877      | 0.974              |
| Cooked vegetable intake      | 11             | -0.06   | 0.11         | 0.546      | 0.836              |
| Dried fruit intake           | 29             | -0.03   | 0.06         | 0.581      | 0.836              |
| Fresh fruit intake           | 39             | -0.04   | 0.07         | 0.547      | 0.836              |
| Lamb/mutton intake           | 29             | 0.04    | 0.07         | 0.511      | 0.836              |
| Non-oily fish intake         | 6              | -0.15   | 0.13         | 0.247      | 0.836              |
| Oily fish intake             | 50             | 0.02    | 0.04         | 0.618      | 0.836              |
| Pork intake                  | 11             | 0.14    | 0.13         | 0.259      | 0.836              |
| Poultry intake               | 3              | -0.04   | 0.18         | 0.832      | 0.974              |
| Processed meat intake        | 18             | -0.03   | 0.07         | 0.65       | 0.836              |
| Salad / raw vegetable intake | 14             | 0       | 0.09         | 0.99       | 0.99               |
| Salt added to food           | 87             | 0.01    | 0.03         | 0.641      | 0.836              |
| Water intake                 | 34             | -0.03   | 0.05         | 0.564      | 0.836              |
| Hot drink temperature        | 57             | 0.07    | 0.06         | 0.245      | 0.836              |
| Tea intake                   | 32             | -0.04   | 0.05         | 0.357      | 0.836              |
| Alcohol intake frequency     | 15             | -0.02   | 0.05         | 0.669      | 0.836              |

Table S14: MR results of WM method for association of dietary habits and chronic knee pain.

| Exposure                     | Number of SNPs | $\beta$ | $SE_{\beta}$ | $p$ -value | adjusted $p$ value |
|------------------------------|----------------|---------|--------------|------------|--------------------|
| Beef intake                  | 13             | -0.12   | 0.07         | 0.081      | 0.751              |
| Bread intake                 | 27             | -0.03   | 0.04         | 0.473      | 0.751              |
| Cereal intake                | 30             | -0.04   | 0.04         | 0.323      | 0.751              |
| Cheese intake                | 46             | -0.03   | 0.03         | 0.329      | 0.751              |
| Coffee intake                | 29             | -0.04   | 0.05         | 0.393      | 0.751              |
| Cooked vegetable intake      | 11             | 0.05    | 0.08         | 0.563      | 0.751              |
| Dried fruit intake           | 29             | -0.05   | 0.05         | 0.255      | 0.751              |
| Fresh fruit intake           | 39             | 0       | 0.06         | 0.994      | 0.994              |
| Lamb/mutton intake           | 29             | -0.11   | 0.05         | 0.054      | 0.751              |
| Non-oily fish intake         | 6              | 0.05    | 0.09         | 0.602      | 0.752              |
| Oily fish intake             | 50             | 0.01    | 0.03         | 0.821      | 0.966              |
| Pork intake                  | 11             | -0.07   | 0.08         | 0.383      | 0.751              |
| Poultry intake               | 3              | 0.01    | 0.15         | 0.943      | 0.994              |
| Processed meat intake        | 18             | -0.03   | 0.05         | 0.508      | 0.751              |
| Salad / raw vegetable intake | 14             | -0.07   | 0.08         | 0.386      | 0.751              |
| Salt added to food           | 87             | 0       | 0.03         | 0.951      | 0.994              |
| Water intake                 | 34             | -0.06   | 0.04         | 0.166      | 0.751              |
| Hot drink temperature        | 57             | 0.05    | 0.05         | 0.273      | 0.751              |
| Tea intake                   | 32             | -0.02   | 0.04         | 0.532      | 0.751              |
| Alcohol intake frequency     | 15             | 0.03    | 0.04         | 0.518      | 0.751              |

Table S15: MR results of PRESSO method for association of dietary habits and multi-site chronic pain.

| Exposure                     | Number of SNPs | $\beta$ | $SE_{\beta}$ | $p$ -value   | adjusted $p$ value |
|------------------------------|----------------|---------|--------------|--------------|--------------------|
| Beef intake                  | 13             | 0.13    | 0.1          | 0.253        | 0.562              |
| Bread intake                 | 26             | -0.03   | 0.06         | 0.647        | 0.827              |
| Cereal intake                | 30             | -0.16   | 0.06         | <b>0.013</b> | <b>0.049</b>       |
| Cheese intake                | 46             | -0.12   | 0.04         | <b>0.003</b> | <b>0.017</b>       |
| Coffee intake                | 29             | -0.04   | 0.06         | 0.523        | 0.827              |
| Cooked vegetable intake      | 11             | 0.11    | 0.11         | 0.318        | 0.626              |
| Dried fruit intake           | 29             | -0.22   | 0.06         | <b>0.002</b> | <b>0.017</b>       |
| Fresh fruit intake           | 39             | -0.15   | 0.07         | <b>0.032</b> | 0.093              |
| Lamb/mutton intake           | 29             | -0.03   | 0.08         | 0.719        | 0.846              |
| Non-oily fish intake         | 6              | -0.02   | 0.22         | 0.928        | 0.937              |
| Oily fish intake             | 50             | -0.05   | 0.05         | 0.344        | 0.626              |
| Pork intake                  | 11             | 0.36    | 0.12         | <b>0.015</b> | <b>0.049</b>       |
| Poultry intake               | 3              | 0.63    | 0.1          | <b>0.007</b> | <b>0.036</b>       |
| Processed meat intake        | 18             | 0.01    | 0.08         | 0.937        | 0.937              |
| Salad / raw vegetable intake | 14             | -0.07   | 0.12         | 0.542        | 0.827              |
| Salt added to food           | 87             | 0.11    | 0.04         | <b>0.002</b> | <b>0.017</b>       |
| Water intake                 | 33             | -0.01   | 0.06         | 0.809        | 0.899              |
| Hot drink temperature        | 57             | 0.03    | 0.07         | 0.662        | 0.827              |
| Tea intake                   | 31             | -0.04   | 0.06         | 0.589        | 0.827              |
| Alcohol intake frequency     | 14             | 0.17    | 0.08         | 0.053        | 0.133              |

Table S16: MR results of PRESSO method for association of dietary habits and chronic back pain.

| Exposure                     | Number of SNPs | $\beta$ | $SE_{\beta}$ | $p$ -value   | adjusted $p$ value |
|------------------------------|----------------|---------|--------------|--------------|--------------------|
| Beef intake                  | 13             | 0.11    | 0.06         | 0.105        | 0.349              |
| Bread intake                 | 27             | -0.01   | 0.03         | 0.782        | 0.9                |
| Cereal intake                | 30             | -0.08   | 0.03         | <b>0.026</b> | 0.11               |
| Cheese intake                | 46             | -0.06   | 0.02         | <b>0.005</b> | 0.097              |
| Coffee intake                | 29             | -0.02   | 0.03         | 0.62         | 0.886              |
| Cooked vegetable intake      | 11             | 0.06    | 0.05         | 0.264        | 0.529              |
| Dried fruit intake           | 29             | -0.05   | 0.03         | 0.168        | 0.48               |
| Fresh fruit intake           | 39             | -0.05   | 0.04         | 0.262        | 0.529              |
| Lamb/mutton intake           | 29             | 0.02    | 0.04         | 0.708        | 0.9                |
| Non-oily fish intake         | 6              | 0.11    | 0.09         | 0.25         | 0.529              |
| Oily fish intake             | 50             | -0.01   | 0.02         | 0.81         | 0.9                |
| Pork intake                  | 11             | 0.23    | 0.08         | <b>0.023</b> | 0.11               |
| Poultry intake               | 3              | 0.26    | 0.07         | <b>0.028</b> | 0.11               |
| Processed meat intake        | 18             | -0.02   | 0.04         | 0.728        | 0.9                |
| Salad / raw vegetable intake | 14             | 0       | 0.06         | 0.966        | 0.966              |
| Salt added to food           | 87             | 0.01    | 0.02         | 0.582        | 0.886              |
| Water intake                 | 34             | -0.02   | 0.03         | 0.609        | 0.886              |
| Hot drink temperature        | 57             | 0       | 0.04         | 0.939        | 0.966              |
| Tea intake                   | 32             | -0.02   | 0.03         | 0.468        | 0.851              |
| Alcohol intake frequency     | 15             | 0.08    | 0.03         | <b>0.013</b> | 0.11               |

Table S17: MR results of PRESSO method for association of dietary habits and chronic hip pain.

| Exposure                     | Number of SNPs | $\beta$ | $SE_{\beta}$ | $p$ -value   | adjusted $p$ value |
|------------------------------|----------------|---------|--------------|--------------|--------------------|
| Beef intake                  | 13             | -0.01   | 0.05         | 0.919        | 0.919              |
| Bread intake                 | 27             | 0.02    | 0.04         | 0.594        | 0.742              |
| Cereal intake                | 30             | -0.03   | 0.05         | 0.501        | 0.742              |
| Cheese intake                | 46             | -0.08   | 0.03         | <b>0.003</b> | 0.054              |
| Coffee intake                | 29             | 0.07    | 0.04         | 0.071        | 0.449              |
| Cooked vegetable intake      | 11             | 0.13    | 0.08         | 0.144        | 0.449              |
| Dried fruit intake           | 29             | -0.07   | 0.05         | 0.157        | 0.449              |
| Fresh fruit intake           | 39             | 0.07    | 0.06         | 0.255        | 0.638              |
| Lamb/mutton intake           | 29             | -0.12   | 0.04         | <b>0.005</b> | 0.054              |
| Non-oily fish intake         | 6              | -0.06   | 0.05         | 0.298        | 0.645              |
| Oily fish intake             | 50             | -0.05   | 0.03         | 0.108        | 0.449              |
| Pork intake                  | 11             | -0.02   | 0.11         | 0.876        | 0.919              |
| Poultry intake               | 3              | 0.02    | 0.13         | 0.891        | 0.919              |
| Processed meat intake        | 18             | 0.06    | 0.05         | 0.322        | 0.645              |
| Salad / raw vegetable intake | 14             | -0.06   | 0.1          | 0.558        | 0.742              |
| Salt added to food           | 87             | 0.03    | 0.02         | 0.127        | 0.449              |
| Water intake                 | 34             | -0.03   | 0.04         | 0.523        | 0.742              |
| Hot drink temperature        | 57             | -0.03   | 0.04         | 0.399        | 0.726              |
| Tea intake                   | 32             | 0.02    | 0.03         | 0.547        | 0.742              |
| Alcohol intake frequency     | 15             | 0       | 0.03         | 0.907        | 0.919              |

Table S18: MR results of PRESSO method for association of dietary habits and chronic neck/shoulder pain.

| Exposure                     | Number of SNPs | $\beta$ | $SE_{\beta}$ | $p$ -value   | adjusted $p$ value |
|------------------------------|----------------|---------|--------------|--------------|--------------------|
| Beef intake                  | 13             | 0       | 0.05         | 0.936        | 0.985              |
| Bread intake                 | 27             | -0.05   | 0.03         | 0.124        | 0.385              |
| Cereal intake                | 30             | -0.05   | 0.03         | 0.088        | 0.351              |
| Cheese intake                | 46             | -0.03   | 0.02         | 0.257        | 0.543              |
| Coffee intake                | 29             | -0.03   | 0.04         | 0.408        | 0.543              |
| Cooked vegetable intake      | 11             | 0.08    | 0.06         | 0.19         | 0.474              |
| Dried fruit intake           | 29             | -0.03   | 0.04         | 0.487        | 0.609              |
| Fresh fruit intake           | 39             | -0.03   | 0.04         | 0.404        | 0.543              |
| Lamb/mutton intake           | 29             | -0.14   | 0.04         | <b>0.003</b> | 0.069              |
| Non-oily fish intake         | 6              | 0.01    | 0.13         | 0.932        | 0.985              |
| Oily fish intake             | 50             | -0.04   | 0.03         | 0.135        | 0.385              |
| Pork intake                  | 11             | 0.11    | 0.1          | 0.321        | 0.543              |
| Poultry intake               | 3              | 0.31    | 0.05         | <b>0.008</b> | 0.085              |
| Processed meat intake        | 18             | -0.05   | 0.05         | 0.349        | 0.543              |
| Salad / raw vegetable intake | 14             | -0.04   | 0.05         | 0.359        | 0.543              |
| Salt added to food           | 87             | 0.03    | 0.02         | <b>0.079</b> | 0.351              |
| Water intake                 | 34             | 0.01    | 0.03         | 0.678        | 0.797              |
| Hot drink temperature        | 57             | 0       | 0.03         | 0.985        | 0.985              |
| Tea intake                   | 32             | 0.03    | 0.03         | 0.273        | 0.543              |
| Alcohol intake frequency     | 15             | 0.09    | 0.03         | <b>0.019</b> | 0.125              |

Table S19: MR results of PRESSO method for association of dietary habits and chronic headache.

| Exposure                     | Number of SNPs | $\beta$ | $SE_{\beta}$ | $p$ -value  | adjusted $p$ value |
|------------------------------|----------------|---------|--------------|-------------|--------------------|
| Beef intake                  | 13             | 0.04    | 0.08         | 0.632       | 0.889              |
| Bread intake                 | 27             | 0.01    | 0.04         | 0.707       | 0.889              |
| Cereal intake                | 30             | 0.01    | 0.04         | 0.728       | 0.889              |
| Cheese intake                | 46             | 0.04    | 0.03         | 0.16        | 0.889              |
| Coffee intake                | 29             | -0.04   | 0.05         | 0.415       | 0.889              |
| Cooked vegetable intake      | 11             | 0.01    | 0.1          | 0.889       | 0.889              |
| Dried fruit intake           | 29             | -0.06   | 0.05         | 0.266       | 0.889              |
| Fresh fruit intake           | 39             | -0.01   | 0.06         | 0.885       | 0.889              |
| Lamb/mutton intake           | 29             | 0.03    | 0.05         | 0.61        | 0.889              |
| Non-oily fish intake         | 6              | -0.11   | 0.14         | 0.481       | 0.889              |
| Oily fish intake             | 50             | -0.02   | 0.03         | 0.436       | 0.889              |
| Pork intake                  | 11             | 0.03    | 0.14         | 0.856       | 0.889              |
| Poultry intake               | 3              | 0.06    | 0.15         | 0.73        | 0.889              |
| Processed meat intake        | 18             | -0.02   | 0.05         | 0.692       | 0.889              |
| Salad / raw vegetable intake | 14             | 0.02    | 0.05         | 0.729       | 0.889              |
| Salt added to food           | 87             | 0       | 0.02         | 0.875       | 0.889              |
| Water intake                 | 34             | -0.06   | 0.05         | 0.251       | 0.889              |
| Hot drink temperature        | 57             | 0.09    | 0.05         | 0.065       | 0.649              |
| Tea intake                   | 32             | -0.08   | 0.03         | <b>0.02</b> | 0.395              |
| Alcohol intake frequency     | 15             | 0.03    | 0.04         | 0.488       | 0.889              |

Table S20: MR results of PRESSO method for association of dietary habits and chronic knee pain.

| Exposure                     | Number of SNPs | $\beta$ | $SE_{\beta}$ | $p$ -value   | adjusted $p$ value |
|------------------------------|----------------|---------|--------------|--------------|--------------------|
| Beef intake                  | 13             | -0.03   | 0.05         | 0.548        | 0.913              |
| Bread intake                 | 27             | 0       | 0.03         | 0.928        | 0.998              |
| Cereal intake                | 30             | 0       | 0.03         | 0.998        | 0.998              |
| Cheese intake                | 46             | -0.02   | 0.02         | 0.258        | 0.729              |
| Coffee intake                | 29             | 0.01    | 0.03         | 0.71         | 0.989              |
| Cooked vegetable intake      | 11             | 0.08    | 0.04         | 0.114        | 0.603              |
| Dried fruit intake           | 29             | -0.03   | 0.03         | 0.328        | 0.729              |
| Fresh fruit intake           | 39             | 0       | 0.04         | 0.974        | 0.998              |
| Lamb/mutton intake           | 29             | -0.09   | 0.04         | <b>0.034</b> | 0.603              |
| Non-oily fish intake         | 6              | 0.06    | 0.06         | 0.433        | 0.866              |
| Oily fish intake             | 50             | -0.03   | 0.03         | 0.222        | 0.729              |
| Pork intake                  | 11             | 0.02    | 0.06         | 0.742        | 0.989              |
| Poultry intake               | 3              | 0.11    | 0.14         | 0.503        | 0.913              |
| Processed meat intake        | 18             | 0.02    | 0.04         | 0.654        | 0.989              |
| Salad / raw vegetable intake | 14             | 0.01    | 0.06         | 0.834        | 0.998              |
| Salt added to food           | 87             | 0.02    | 0.02         | 0.304        | 0.729              |
| Water intake                 | 34             | -0.05   | 0.03         | 0.09         | 0.603              |
| Hot drink temperature        | 57             | 0       | 0.03         | 0.995        | 0.998              |
| Tea intake                   | 32             | -0.03   | 0.02         | 0.298        | 0.729              |
| Alcohol intake frequency     | 15             | 0.04    | 0.03         | 0.121        | 0.603              |

Table S21: Heterogeneity and pleiotropy test for association of dietary habits and multi-site chronic pain.

| Exposure                     | Heterogeneity test (MR-Egger) |        | Heterogeneity test (IVW) |        | PRESSO Method |                   | Pleiotropy test (MR-Egger intercept test) |         | Steiger directionality test |           |
|------------------------------|-------------------------------|--------|--------------------------|--------|---------------|-------------------|-------------------------------------------|---------|-----------------------------|-----------|
|                              | Q                             | p      | Q                        | p      | Global p      | Distortion Test p | Egger Inter                               | Inter p | Correct Causal Direction    | Steiger p |
| Beef intake                  | 37.350                        | <0.001 | 38.235                   | <0.001 | <0.001        | <b>0.025</b>      | 0.004                                     | 0.620   | TRUE                        | < 0.001   |
| Bread intake                 | 83.276                        | <0.001 | 85.912                   | <0.001 | <0.001        | 0.107             | 0.004                                     | 0.392   | TRUE                        | < 0.001   |
| Cereal intake                | 71.064                        | <0.001 | 73.388                   | <0.001 | <0.001        | NA                | 0.003                                     | 0.347   | TRUE                        | < 0.001   |
| Cheese intake                | 87.459                        | <0.001 | 87.490                   | <0.001 | <0.001        | 0.098             | <0.001                                    | 0.901   | TRUE                        | < 0.001   |
| Coffee intake                | 56.508                        | 0.001  | 58.700                   | 0.001  | 0.001         | 0.298             | -0.003                                    | 0.315   | TRUE                        | < 0.001   |
| Cooked vegetable intake      | 18.200                        | 0.033  | 18.392                   | 0.049  | 0.052         | NA                | 0.004                                     | 0.765   | TRUE                        | < 0.001   |
| Dried fruit intake           | 67.203                        | <0.001 | 67.779                   | <0.001 | <0.001        | 0.724             | 0.002                                     | 0.634   | TRUE                        | < 0.001   |
| Fresh fruit intake           | 80.543                        | <0.001 | 83.220                   | <0.001 | <0.001        | 0.749             | -0.002                                    | 0.275   | TRUE                        | < 0.001   |
| Lamb/mutton                  | 75.593                        | <0.001 | 77.058                   | <0.001 | <0.001        | 0.628             | -0.003                                    | 0.476   | TRUE                        | < 0.001   |
| Non-oily fish intake         | 15.713                        | 0.003  | 25.205                   | <0.001 | 0.001         | >0.999            | 0.015                                     | 0.195   | TRUE                        | < 0.001   |
| Oily fish intake             | 145.781                       | <0.001 | 147.134                  | <0.001 | <0.001        | <b>0.023</b>      | -0.002                                    | 0.508   | TRUE                        | < 0.001   |
| Pork intake                  | 21.477                        | 0.011  | 22.102                   | 0.015  | 0.026         | 0.574             | -0.004                                    | 0.621   | TRUE                        | < 0.001   |
| Poultry intake               | 0.313                         | 0.576  | 0.438                    | 0.803  | 0.654         | NA                | -0.018                                    | 0.783   | TRUE                        | < 0.001   |
| Processed meat intake        | 56.528                        | <0.001 | 56.872                   | <0.001 | <0.001        | 0.615             | 0.002                                     | 0.759   | TRUE                        | < 0.001   |
| Salad / raw vegetable intake | 20.965                        | 0.051  | 28.023                   | 0.009  | 0.001         | NA                | -0.010                                    | 0.067   | TRUE                        | < 0.001   |
| Salt added to food           | 225.584                       | <0.001 | 228.171                  | <0.001 | <0.001        | 0.952             | 0.002                                     | 0.326   | TRUE                        | < 0.001   |
| Water intake                 | 78.512                        | <0.001 | 80.219                   | <0.001 | <0.001        | 0.997             | 0.003                                     | 0.418   | TRUE                        | < 0.001   |
| Hot drink temperature        | 137.439                       | <0.001 | 142.200                  | <0.001 | <0.001        | 0.228             | -0.004                                    | 0.173   | TRUE                        | < 0.001   |
| Tea intake                   | 125.355                       | <0.001 | 125.474                  | <0.001 | <0.001        | 0.837             | -0.001                                    | 0.869   | TRUE                        | < 0.001   |
| Alcohol intake frequency     | 43.307                        | <0.001 | 45.770                   | <0.001 | <0.001        | 0.920             | 0.006                                     | 0.425   | TRUE                        | < 0.001   |

Table S22: Heterogeneity and pleiotropy test for association of dietary habits and chronic neck/shoulder pain.

| Exposure                     | Heterogeneity test (MR-Egger) |       | Heterogeneity test (IVW) |       | PRESSO Method |                   | Pleiotropy test (MR-Egger intercept test) |         | Steiger directionality test |           |
|------------------------------|-------------------------------|-------|--------------------------|-------|---------------|-------------------|-------------------------------------------|---------|-----------------------------|-----------|
|                              | Q                             | p     | Q                        | p     | Global p      | Distortion Test p | Egger Inter                               | Inter p | Correct Causal Direction    | Steiger p |
| Beef intake                  | 8.555                         | 0.663 | 9.326                    | 0.675 | 0.335         | NA                | 0.003                                     | 0.399   | TRUE                        | < 0.001   |
| Bread intake                 | 29.301                        | 0.252 | 29.449                   | 0.291 | 0.252         | NA                | 0.001                                     | 0.725   | TRUE                        | < 0.001   |
| Cereal intake                | 26.374                        | 0.552 | 27.484                   | 0.546 | 0.516         | NA                | 0.002                                     | 0.301   | TRUE                        | < 0.001   |
| Cheese intake                | 46.712                        | 0.362 | 47.071                   | 0.388 | 0.377         | NA                | 0.001                                     | 0.564   | TRUE                        | < 0.001   |
| Coffee intake                | 23.719                        | 0.646 | 24.259                   | 0.668 | 0.438         | NA                | -0.001                                    | 0.469   | TRUE                        | < 0.001   |
| Cooked vegetable intake      | 6.755                         | 0.663 | 8.020                    | 0.627 | 0.646         | NA                | 0.008                                     | 0.290   | TRUE                        | < 0.001   |
| Dried fruit intake           | 38.375                        | 0.072 | 38.377                   | 0.091 | 0.106         | NA                | 0.000                                     | 0.969   | TRUE                        | < 0.001   |
| Fresh fruit intake           | 41.166                        | 0.293 | 42.364                   | 0.288 | 0.294         | NA                | 0.001                                     | 0.306   | TRUE                        | < 0.001   |
| Lamb/mutton                  | 31.770                        | 0.241 | 35.997                   | 0.143 | 0.165         | NA                | -0.004                                    | 0.069   | TRUE                        | < 0.001   |
| Non-oily fish                | 9.446                         | 0.051 | 12.467                   | 0.029 | 0.049         | 0.363             | 0.007                                     | 0.321   | TRUE                        | < 0.001   |
| Oily fish intake             | 59.488                        | 0.124 | 59.514                   | 0.144 | 0.006         | 0.657             | 0.000                                     | 0.886   | TRUE                        | < 0.001   |
| Pork intake                  | 20.543                        | 0.015 | 22.902                   | 0.011 | 0.013         | 0.518             | -0.007                                    | 0.336   | TRUE                        | < 0.001   |
| Poultry intake               | 0.119                         | 0.730 | 0.809                    | 0.667 | 0.874         | NA                | 0.034                                     | 0.559   | TRUE                        | < 0.001   |
| Processed meat intake        | 31.326                        | 0.012 | 32.610                   | 0.013 | 0.012         | 0.262             | 0.003                                     | 0.430   | TRUE                        | < 0.001   |
| Salad / raw vegetable intake | 10.104                        | 0.607 | 10.233                   | 0.675 | 0.812         | NA                | -0.001                                    | 0.726   | TRUE                        | < 0.001   |
| Salt added to food           | 101.492                       | 0.107 | 108.403                  | 0.052 | 0.055         | NA                | 0.002                                     | 0.018   | TRUE                        | < 0.001   |
| Water intake                 | 23.421                        | 0.865 | 24.711                   | 0.850 | 0.850         | NA                | -0.002                                    | 0.264   | TRUE                        | < 0.001   |
| Hot drink temperature        | 52.064                        | 0.588 | 52.064                   | 0.625 | 0.594         | NA                | 0.000                                     | 0.988   | TRUE                        | < 0.001   |
| Tea intake                   | 32.074                        | 0.364 | 32.865                   | 0.376 | 0.437         | NA                | 0.001                                     | 0.396   | TRUE                        | < 0.001   |
| Alcohol intake frequency     | 17.477                        | 0.178 | 18.133                   | 0.201 | 0.157         | NA                | 0.003                                     | 0.497   | TRUE                        | < 0.001   |

Table S23: Heterogeneity and pleiotropy test for association of dietary habits and chronic hip pain.

| Exposure                     | Heterogeneity test (MR-Egger) |       | Heterogeneity test (IVW) |       | PRESSO Method |                   | Pleiotropy test (MR-Egger intercept test) |         | Steiger directionality test |           |
|------------------------------|-------------------------------|-------|--------------------------|-------|---------------|-------------------|-------------------------------------------|---------|-----------------------------|-----------|
|                              | Q                             | p     | Q                        | p     | Global p      | Distortion Test p | Egger Inter                               | Inter p | Correct Causal Direction    | Steiger p |
| Beef intake                  | 6.850                         | 0.811 | 7.674                    | 0.810 | 0.858         | NA                | -0.004                                    | 0.384   | TRUE                        | < 0.001   |
| Bread intake                 | 25.804                        | 0.418 | 25.819                   | 0.473 | 0.534         | NA                | 0.000                                     | 0.904   | TRUE                        | < 0.001   |
| Cereal intake                | 38.630                        | 0.087 | 39.007                   | 0.102 | 0.063         | NA                | 0.001                                     | 0.605   | TRUE                        | < 0.001   |
| Cheese intake                | 37.820                        | 0.733 | 37.823                   | 0.767 | 0.803         | NA                | 0.000                                     | 0.952   | TRUE                        | < 0.001   |
| Coffee intake                | 18.575                        | 0.885 | 18.720                   | 0.907 | 0.929         | NA                | -0.001                                    | 0.706   | TRUE                        | < 0.001   |
| Cooked vegetable intake      | 7.068                         | 0.630 | 8.976                    | 0.534 | 0.546         | NA                | 0.012                                     | 0.200   | TRUE                        | < 0.001   |
| Dried fruit intake           | 28.314                        | 0.395 | 29.170                   | 0.404 | 0.432         | NA                | -0.002                                    | 0.374   | TRUE                        | < 0.001   |
| Fresh fruit intake           | 52.361                        | 0.048 | 52.601                   | 0.058 | 0.075         | NA                | -0.001                                    | 0.683   | TRUE                        | < 0.001   |
| Lamb/mutton intake           | 15.800                        | 0.957 | 16.604                   | 0.956 | 0.937         | NA                | -0.002                                    | 0.378   | TRUE                        | < 0.001   |
| Non-oily fish intake         | 1.169                         | 0.883 | 1.275                    | 0.938 | 0.943         | NA                | 0.002                                     | 0.762   | TRUE                        | < 0.001   |
| Oily fish intake             | 53.893                        | 0.259 | 56.903                   | 0.205 | 0.178         | NA                | 0.003                                     | 0.108   | TRUE                        | < 0.001   |
| Pork intake                  | 14.634                        | 0.101 | 14.639                   | 0.146 | 0.168         | NA                | 0.000                                     | 0.959   | TRUE                        | < 0.001   |
| Poultry intake               | 0.904                         | 0.342 | 3.106                    | 0.212 | 0.434         | NA                | -0.078                                    | 0.378   | TRUE                        | < 0.001   |
| Processed meat intake        | 20.046                        | 0.218 | 20.762                   | 0.237 | 0.247         | NA                | 0.003                                     | 0.461   | TRUE                        | < 0.001   |
| Salad / raw vegetable intake | 22.952                        | 0.028 | 23.577                   | 0.035 | 0.078         | NA                | 0.003                                     | 0.578   | TRUE                        | < 0.001   |
| Salt added to Water intake   | 79.477                        | 0.649 | 79.485                   | 0.677 | 0.670         | NA                | 0.000                                     | 0.929   | TRUE                        | < 0.001   |
| Hot drink temperature        | 39.420                        | 0.172 | 39.803                   | 0.193 | 0.201         | NA                | 0.001                                     | 0.581   | TRUE                        | < 0.001   |
| Tea intake                   | 50.278                        | 0.655 | 50.726                   | 0.674 | 0.790         | NA                | -0.001                                    | 0.506   | TRUE                        | < 0.001   |
| Alcohol intake frequency     | 26.223                        | 0.664 | 30.033                   | 0.516 | 0.535         | NA                | -0.004                                    | 0.060   | TRUE                        | < 0.001   |
|                              | 9.825                         | 0.708 | 10.255                   | 0.743 | 0.649         | NA                | 0.003                                     | 0.524   | TRUE                        | < 0.001   |

Table S24: Heterogeneity and pleiotropy test for association of dietary habits and chronic back pain.

| Exposure                     | Heterogeneity test (MR-Egger) |       | Heterogeneity test (IVW) |       | PRESSO Method |                   | Pleiotropy test (MR-Egger intercept test) |         | Steiger directionality test |           |
|------------------------------|-------------------------------|-------|--------------------------|-------|---------------|-------------------|-------------------------------------------|---------|-----------------------------|-----------|
|                              | Q                             | p     | Q                        | p     | Global p      | Distortion Test p | Egger Inter                               | Inter p | Correct Causal Direction    | Steiger p |
| Beef intake                  | 19.471                        | 0.053 | 20.990                   | 0.051 | 0.044         | NA                | -0.004                                    | 0.374   | TRUE                        | < 0.001   |
| Bread intake                 | 35.295                        | 0.083 | 36.388                   | 0.085 | 0.091         | NA                | -0.002                                    | 0.387   | TRUE                        | < 0.001   |
| Cereal intake                | 42.834                        | 0.036 | 43.447                   | 0.041 | 0.052         | NA                | 0.001                                     | 0.532   | TRUE                        | < 0.001   |
| Cheese intake                | 41.687                        | 0.571 | 41.708                   | 0.612 | 0.633         | NA                | 0.000                                     | 0.887   | TRUE                        | < 0.001   |
| Coffee intake                | 28.494                        | 0.386 | 29.040                   | 0.410 | 0.467         | NA                | 0.001                                     | 0.478   | TRUE                        | < 0.001   |
| Cooked vegetable intake      | 6.079                         | 0.732 | 6.525                    | 0.769 | 0.781         | NA                | 0.004                                     | 0.521   | TRUE                        | < 0.001   |
| Dried fruit intake           | 28.464                        | 0.387 | 28.945                   | 0.415 | 0.452         | NA                | 0.001                                     | 0.505   | TRUE                        | < 0.001   |
| Fresh fruit intake           | 45.648                        | 0.156 | 46.464                   | 0.163 | 0.178         | NA                | 0.001                                     | 0.421   | TRUE                        | < 0.001   |
| Lamb/mutton                  | 31.822                        | 0.239 | 38.944                   | 0.082 | 0.081         | NA                | -0.005                                    | 0.021   | TRUE                        | < 0.001   |
| Non-oily fish                | 5.118                         | 0.275 | 6.371                    | 0.272 | 0.309         | NA                | 0.004                                     | 0.378   | TRUE                        | < 0.001   |
| Oily fish intake             | 57.957                        | 0.154 | 58.582                   | 0.164 | 0.054         | NA                | -0.001                                    | 0.475   | TRUE                        | < 0.001   |
| Pork intake                  | 14.711                        | 0.099 | 16.698                   | 0.081 | 0.102         | NA                | -0.006                                    | 0.299   | TRUE                        | < 0.001   |
| Poultry intake               | 0.095                         | 0.758 | 1.123                    | 0.570 | 0.720         | NA                | 0.039                                     | 0.496   | TRUE                        | < 0.001   |
| Processed meat intake        | 23.716                        | 0.096 | 25.940                   | 0.076 | 0.079         | NA                | -0.004                                    | 0.238   | TRUE                        | < 0.001   |
| Salad / raw vegetable intake | 19.623                        | 0.075 | 19.966                   | 0.096 | 0.174         | NA                | -0.002                                    | 0.655   | TRUE                        | < 0.001   |
| Salt added to food           | 102.093                       | 0.100 | 102.095                  | 0.113 | 0.128         | NA                | 0.000                                     | 0.971   | TRUE                        | < 0.001   |
| Water intake                 | 44.216                        | 0.074 | 44.228                   | 0.092 | 0.082         | NA                | 0.000                                     | 0.926   | TRUE                        | < 0.001   |
| Hot drink temperature        | 69.332                        | 0.093 | 75.291                   | 0.044 | 0.050         | NA                | -0.003                                    | 0.034   | TRUE                        | < 0.001   |
| Tea intake                   | 40.311                        | 0.099 | 40.752                   | 0.113 | 0.134         | NA                | 0.001                                     | 0.571   | TRUE                        | < 0.001   |
| Alcohol intake frequency     | 10.076                        | 0.688 | 10.868                   | 0.696 | 0.469         | NA                | 0.003                                     | 0.390   | TRUE                        | < 0.001   |

Table S25: Heterogeneity and pleiotropy test for association of dietary habits and chronic knee pain.

| Exposure                     | Heterogeneity test (MR-Egger) |       | Heterogeneity test (IVW) |       | PRESSO Method |                   | Pleiotropy test (MR-Egger intercept test) |         | Steiger directionality test |           |
|------------------------------|-------------------------------|-------|--------------------------|-------|---------------|-------------------|-------------------------------------------|---------|-----------------------------|-----------|
|                              | Q                             | p     | Q                        | p     | Global p      | Distortion Test p | Egger Inter                               | Inter p | Correct Causal Direction    | Steiger p |
| Beef intake                  | 16.729                        | 0.116 | 17.891                   | 0.119 | 0.177         | NA                | 0.003                                     | 0.401   | TRUE                        | < 0.001   |
| Bread intake                 | 43.364                        | 0.013 | 43.703                   | 0.016 | 0.019         | 0.768             | 0.001                                     | 0.662   | TRUE                        | < 0.001   |
| Cereal intake                | 24.723                        | 0.643 | 28.759                   | 0.478 | 0.428         | NA                | 0.003                                     | 0.054   | TRUE                        | < 0.001   |
| Cheese intake                | 45.379                        | 0.414 | 45.772                   | 0.440 | 0.417         | NA                | 0.001                                     | 0.540   | TRUE                        | < 0.001   |
| Coffee intake                | 28.377                        | 0.392 | 29.419                   | 0.392 | 0.442         | NA                | 0.002                                     | 0.328   | TRUE                        | < 0.001   |
| Cooked vegetable intake      | 3.740                         | 0.928 | 5.481                    | 0.857 | 0.846         | NA                | 0.008                                     | 0.220   | TRUE                        | < 0.001   |
| Dried fruit intake           | 24.901                        | 0.580 | 27.151                   | 0.510 | 0.516         | NA                | -0.002                                    | 0.145   | TRUE                        | < 0.001   |
| Fresh fruit intake           | 46.255                        | 0.142 | 51.615                   | 0.069 | 0.091         | NA                | -0.003                                    | 0.045   | TRUE                        | < 0.001   |
| Lamb/mutton                  | 35.465                        | 0.127 | 35.609                   | 0.153 | 0.149         | NA                | -0.001                                    | 0.743   | TRUE                        | < 0.001   |
| Non-oily fish intake         | 3.745                         | 0.442 | 3.790                    | 0.580 | 0.615         | NA                | 0.001                                     | 0.842   | TRUE                        | < 0.001   |
| Oily fish intake             | 72.368                        | 0.013 | 73.088                   | 0.014 | 0.015         | 0.408             | -0.001                                    | 0.493   | TRUE                        | < 0.001   |
| Pork intake                  | 8.962                         | 0.441 | 9.146                    | 0.518 | 0.540         | NA                | -0.002                                    | 0.678   | TRUE                        | < 0.001   |
| Poultry intake               | 5.228                         | 0.022 | 5.667                    | 0.059 | 0.134         | NA                | -0.025                                    | 0.820   | TRUE                        | < 0.001   |
| Processed meat intake        | 18.490                        | 0.296 | 18.642                   | 0.349 | 0.361         | NA                | 0.001                                     | 0.722   | TRUE                        | < 0.001   |
| Salad / raw vegetable intake | 22.487                        | 0.032 | 22.526                   | 0.048 | 0.107         | NA                | 0.001                                     | 0.888   | TRUE                        | < 0.001   |
| Salt added to food           | 82.532                        | 0.556 | 85.359                   | 0.499 | 0.437         | NA                | 0.001                                     | 0.096   | TRUE                        | < 0.001   |
| Water intake                 | 30.229                        | 0.556 | 31.467                   | 0.543 | 0.548         | NA                | 0.002                                     | 0.274   | TRUE                        | < 0.001   |
| Hot drink temperature        | 47.816                        | 0.743 | 49.903                   | 0.704 | 0.713         | NA                | -0.002                                    | 0.154   | TRUE                        | < 0.001   |
| Tea intake                   | 30.344                        | 0.448 | 33.215                   | 0.360 | 0.327         | NA                | 0.002                                     | 0.102   | TRUE                        | < 0.001   |
| Alcohol intake frequency     | 15.041                        | 0.305 | 15.070                   | 0.373 | 0.386         | NA                | -0.001                                    | 0.877   | TRUE                        | < 0.001   |

Table S26: Heterogeneity and pleiotropy test for association of dietary habits and chronic headache.

| Exposure                     | Heterogeneity test (MR-Egger) |       | Heterogeneity test (IVW) |       | PRESSO Method |                   | Pleiotropy test (MR-Egger intercept test) |         | Steiger directionality test |           |
|------------------------------|-------------------------------|-------|--------------------------|-------|---------------|-------------------|-------------------------------------------|---------|-----------------------------|-----------|
|                              | Q                             | p     | Q                        | p     | Global p      | Distortion Test p | Egger Inter                               | Inter p | Correct Causal Direction    | Steiger p |
| Beef intake                  | 26.002                        | 0.006 | 26.014                   | 0.011 | 0.014         | <b>0.0381</b>     | 0.000                                     | 0.944   | TRUE                        | < 0.001   |
| Bread intake                 | 31.056                        | 0.187 | 33.813                   | 0.140 | 0.097         | NA                | 0.003                                     | 0.149   | TRUE                        | < 0.001   |
| Cereal intake                | 37.615                        | 0.106 | 40.613                   | 0.074 | 0.062         | NA                | 0.004                                     | 0.146   | TRUE                        | < 0.001   |
| Cheese intake                | 48.400                        | 0.300 | 48.879                   | 0.320 | 0.351         | NA                | 0.001                                     | 0.513   | TRUE                        | < 0.001   |
| Coffee intake                | 48.589                        | 0.007 | 48.765                   | 0.009 | 0.012         | NA                | 0.001                                     | 0.757   | TRUE                        | < 0.001   |
| Cooked vegetable intake      | 17.547                        | 0.041 | 18.305                   | 0.050 | 0.064         | NA                | 0.007                                     | 0.548   | TRUE                        | < 0.001   |
| Dried fruit intake           | 35.957                        | 0.116 | 41.137                   | 0.052 | 0.052         | NA                | 0.005                                     | 0.059   | TRUE                        | < 0.001   |
| Fresh fruit intake           | 68.481                        | 0.001 | 68.492                   | 0.002 | 0.001         | 0.1324            | 0.000                                     | 0.939   | TRUE                        | < 0.001   |
| Lamb/mutton intake           | 33.182                        | 0.191 | 33.453                   | 0.219 | 0.243         | NA                | -0.001                                    | 0.643   | TRUE                        | < 0.001   |
| Non-oily fish intake         | 11.475                        | 0.022 | 11.641                   | 0.040 | 0.065         | NA                | 0.002                                     | 0.822   | TRUE                        | < 0.001   |
| Oily fish intake             | 65.230                        | 0.049 | 65.318                   | 0.059 | 0.069         | NA                | 0.000                                     | 0.800   | TRUE                        | < 0.001   |
| Pork intake                  | 18.299                        | 0.032 | 30.638                   | NA    | 0.001         | 0.3083            | -0.018                                    | 0.036   | TRUE                        | < 0.001   |
| Poultry intake               | 0.188                         | 0.665 | 3.490                    | 0.175 | 0.230         | NA                | -0.085                                    | 0.320   | TRUE                        | < 0.001   |
| Processed meat               | 16.879                        | 0.393 | 24.291                   | 0.112 | 0.114         | NA                | -0.008                                    | 0.017   | TRUE                        | < 0.001   |
| Salad / raw vegetable intake | 3.990                         | 0.984 | 6.830                    | 0.911 | 0.899         | NA                | -0.006                                    | 0.118   | TRUE                        | < 0.001   |
| Salt added to food           | #####                         | 0.003 | 130.825                  | 0.001 | 0.001         | NA                | 0.002                                     | 0.076   | TRUE                        | < 0.001   |
| Water intake                 | 58.156                        | 0.003 | 58.853                   | 0.004 | 0.004         | 0.3365            | -0.002                                    | 0.540   | TRUE                        | < 0.001   |
| Hot drink                    | 83.003                        | 0.009 | 83.877                   | 0.009 | 0.018         | NA                | 0.002                                     | 0.450   | TRUE                        | < 0.001   |
| Tea intake                   | 38.916                        | 0.128 | 39.673                   | 0.137 | 0.175         | NA                | 0.002                                     | 0.451   | TRUE                        | < 0.001   |
| Alcohol intake frequency     | 23.696                        | 0.034 | 24.123                   | 0.044 | 0.066         | NA                | 0.003                                     | 0.637   | TRUE                        | < 0.001   |
